# Supplementary material for: Systematic review and meta-analysis of prognostic factors of acute exacerbation of idiopathic pulmonary fibrosis
Source: PubMed Central journal article supplement — BMJ Open. 2020 Jun 15;10(6):e035420. doi: 10.1136/bmjopen-2019-035420 (PMC7299085; doi:10.1136/bmjopen-2019-035420), 2020-06-15
Supplement: bmjopen-2019-035420.draft_revisions.pdf [file bmjopen-2019-035420.draft_revisions.pdf]

# BMJ Open

BMJ Open is committed to open peer review. As part of this commitment we make the peer review history of every article we publish publicly available.

When an article is published we post the peer reviewers' comments and the authors' responses online. We also post the versions of the paper that were used during peer review. These are the versions that the peer review comments apply to.

The versions of the paper that follow are the versions that were submitted during the peer review process. They are not the versions of record or the final published versions. They should not be cited or distributed as the published version of this manuscript.

BMJ Open is an open access journal and the full, final, typeset and author-corrected version of record of the manuscript is available on our site with no access controls, subscription charges or pay-per-view fees (<http://bmjopen.bmj.com>).

If you have any questions on BMJ Open's open peer review process please email [info.bmjopen@bmj.com](mailto:info.bmjopen@bmj.com)

# BMJ Open

## **A systematic review and meta-analysis of prognostic factors of acute exacerbation of idiopathic pulmonary fibrosis**

|                               |                                                                                                                                                                       |
|-------------------------------|-----------------------------------------------------------------------------------------------------------------------------------------------------------------------|
| Journal:                      | <i>BMJ Open</i>                                                                                                                                                       |
| Manuscript ID                 | bmjopen-2019-035420                                                                                                                                                   |
| Article Type:                 | Original research                                                                                                                                                     |
| Date Submitted by the Author: | 31-Oct-2019                                                                                                                                                           |
| Complete List of Authors:     | Kamiya, Hiroyuki; University of Western Australia, School of Population and Global Health<br>Panlaqui, Ogee; Northern Hospital, Department of Intensive Care Medicine |
| Keywords:                     | Interstitial lung disease < THORACIC MEDICINE, Epidemiology < THORACIC MEDICINE, Adult thoracic medicine < THORACIC MEDICINE                                          |
|                               |                                                                                                                                                                       |

SCHOLARONE™  
Manuscripts

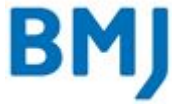

I, the Submitting Author has the right to grant and does grant on behalf of all authors of the Work (as defined in the below author licence), an exclusive licence and/or a non-exclusive licence for contributions from authors who are: i) UK Crown employees; ii) where BMJ has agreed a CC-BY licence shall apply, and/or iii) in accordance with the terms applicable for US Federal Government officers or employees acting as part of their official duties; on a worldwide, perpetual, irrevocable, royalty-free basis to BMJ Publishing Group Ltd ("BMJ") its licensees and where the relevant Journal is co-owned by BMJ to the co-owners of the Journal, to publish the Work in this journal and any other BMJ products and to exploit all rights, as set out in our [licence](#).

The Submitting Author accepts and understands that any supply made under these terms is made by BMJ to the Submitting Author unless you are acting as an employee on behalf of your employer or a postgraduate student of an affiliated institution which is paying any applicable article publishing charge ("APC") for Open Access articles. Where the Submitting Author wishes to make the Work available on an Open Access basis (and intends to pay the relevant APC), the terms of reuse of such Open Access shall be governed by a Creative Commons licence – details of these licences and which [Creative Commons](#) licence will apply to this Work are set out in our licence referred to above.

Other than as permitted in any relevant BMJ Author's Self Archiving Policies, I confirm this Work has not been accepted for publication elsewhere, is not being considered for publication elsewhere and does not duplicate material already published. I confirm all authors consent to publication of this Work and authorise the granting of this licence.

1  
2  
3  
4  
5  
6  
7 **Title page**  
8

9 **Title**  
10

11 A systematic review and meta-analysis of prognostic factors of acute exacerbation of  
12 idiopathic pulmonary fibrosis  
13  
14

15 **Authors**  
16

17 Hiroyuki Kamiya<sup>1\*</sup>, Ogee Mer Panlaqui<sup>2</sup>

18 <sup>1</sup>School of Population and Global Health, University of Western Australia, Perth,  
19 Australia 6009  
20

21 Tel: +61 8 6488 6000  
22

23 Email: mlb04194@nifty.com  
24

25 <sup>2</sup>Department of Intensive Care Medicine, Northern Hospital, Epping, Australia  
26

27 \*corresponding author  
28

29 **Word count**  
30

31 4160  
32  
33  
34  
35  
36  
37  
38  
39  
40  
41  
42  
43  
44  
45  
46  
47  
48  
49  
50  
51  
52  
53  
54  
55  
56  
57  
58  
59  
60

## Abstract

### Objective

To clarify prognostic factors of acute exacerbation (AE) of idiopathic pulmonary fibrosis (IPF).

### Design

A systematic review and meta-analysis.

### Data sources

Medline, EMBASE and Science Citation Index Expanded were searched from 2002 through 1 March 2019.

### Eligibility criteria for selecting studies

The review included primary studies addressing the association between the outcomes such as all-cause mortality of AE of IPF and its potential prognostic factors, which were designated as any clinical information related to the outcomes.

### Data extraction and synthesis

Two reviewers extracted relevant data independently and assessed risk of bias. Univariate results were pooled using a random-effects model if at least three studies were available. Prognostic factors were determined based on significant and consistent results on both univariate and multivariate analyses in the majority of studies.

### Results

Out of a total of 6763 articles retrieved, 37 were eligible and cumulatively, 30 potential prognostic factors for all-cause mortality were selected. Each study was subject to certain methodological shortcomings. The following five factors were statistically significant by a meta-analysis of univariate results, which was confirmed by multivariate analysis, i.e., Acute Physiology and Chronic Health Evaluation (APACHE) II score (hazard ratio (HR) 1.09, 1.04-1.15), partial pressure of arterial oxygen to fraction of inspired oxygen (PaO<sub>2</sub>/FiO<sub>2</sub>) ratio (HR 0.95, 0.92-0.97/odds ratio (OR) 0.92, 0.89-0.95), lactate dehydrogenase (LDH) (HR 1.02, 1.01-1.02/standardized mean difference (SMD) 0.48, 0.11-0.84), white blood cell (WBC) count (MD 1.35, 0.19-2.51) and oxygen therapy before AE (HR 1.88, 1.15-3.09) (pooled estimates of univariate

1  
2  
3  
4  
5  
6 results, 95% confidence interval). The quality of the presented evidence was rated as  
7 either low or very low.  
8

## 9 Conclusions

10  
11 APACHE II score, PaO<sub>2</sub>/FiO<sub>2</sub> ratio, LDH, WBC count and oxygen therapy before AE  
12 were deemed as prognostic factors of AE of IPF. However, the findings should be  
13 interpreted cautiously due to the low evidence level.  
14  
15

## 16 Registration

17  
18  
19 CRD 42018106172  
20  
21  
22  
23

## 24 Keywords

25  
26  
27 Idiopathic pulmonary fibrosis, acute exacerbation, prognosis, systematic review, meta-  
28 analysis  
29  
30  
31  
32  
33  
34  
35

## 36 Article Summary

### 37 Strengths and limitations of this study

- 38  
39  
40
- 41 • This systematic review and meta-analysis addressed the shortcoming in previous  
42 reports of prognostic factors of AE of IPF, which were composed of only small  
43 studies and thus may have generated spurious results.
  - 44 • All primary studies were subject to certain methodological constraints, which  
45 undermined the quality of evidence derived from this review.
  - 46 • An applicability of the findings may be limited because most of the reports  
47 constituting this review were derived from only one region.  
48  
49  
50  
51  
52  
53  
54  
55  
56  
57  
58  
59  
60

## Introduction

Interstitial pneumonia (IP) is a heterogeneous clinical entity, which is characterized by common pathological findings of fibrosis in the interstitium of pulmonary parenchyma.[1] Idiopathic pulmonary fibrosis (IPF) is the most common IP among idiopathic IPs (IIPs) with no apparent causes.[2] The disease has been at the centre of vigorous research over the last few decades given the evolution of diagnostic modalities.[3] IPF is known to be a fatal disease leading to respiratory failure due to its natural progression [4] and other comorbidities such as lung cancer, infection and cardiovascular diseases.[5] However, the most common cause of deaths of IPF is the event called an acute exacerbation (AE), occurring in approximately 40% of the cases.[6] This unique phenomenon was first reported as small case series, in which three patients with IPF presented with acute worsening of respiratory symptoms alongside with newly emerging bilateral radiological opacities that were related to no identifiable causes.[7] Subsequently, AE of IPF was recognized as not uncommon phenomenon and defined both clinically and radiologically by the latest international diagnostic criteria.[8] The pathogenesis of AE of IPF is still unknown although previous research disputed whether it is an autonomic acceleration of fibrotic process or an aggravation caused by external stimuli.[9] It is unpredictable in most cases regardless of some risk factors described by previous studies.[10] Once AE of IPF develops, the prognosis of this condition is extremely dismal due to no established therapeutic options.[11] However, there is a variation of mortality in previous reports, e.g., an estimated in-hospital mortality of 80% by an earlier study [12] and 90-day mortality of 70% by a recent study.[13] These discrepancies may suggest that the prognosis of AE of IPF varies between patients although between-study variations may be largely attributed to selection bias.[14] The knowledge of prognostic factors that would determine the prognosis of an individual patient is vital to make a therapeutic strategy, provide patients and families with relevant information to guide their decision-making and help design future research of pharmaceutical intervention.[15] Some research groups previously investigated prognostic factors of AE of IPF.[16] However, these previous findings may be anecdotal because most of them were derived from retrospective studies with a small sample size.[17] In addition, a prospective cohort study to investigate prognostic factors of AE of IPF may be unfeasible because of the unpredictable course of the disease, preventing recruitment of a larger sample size.[18] Therefore, the aim of this systematic review and meta-analysis was to overcome the limitation of a primary study in this research area and summarize current evidence

1  
2  
3  
4  
5  
6 regarding prognostic factors of AE of IPF. This study was registered with International  
7 Prospective Register of Systematic Reviews (PROSPERO) (CRD42018106172).  
8  
9

## 10 **Methods**

11  
12 This review was conducted and reported according to the Preferred Reporting Items for  
13 Systematic Reviews and Meta-Analyses (PRISMA) [19] and the Meta-analysis of  
14 Observational Studies in Epidemiology (MOOSE) statement.[20] The methods were  
15 described briefly as the in-depths of methodology of this study were reported as a  
16 protocol paper beforehand.[21]  
17  
18  
19

### 20 Patient and public involvement

21  
22 There was no patient and public involvement in the whole process of conducting this  
23 research.  
24  
25

### 26 Eligibility criteria

27  
28 Patients with AE of IPF were eligible for this review. AE and IPF were diagnosed based  
29 on previously published international guidelines relevant to respective condition or  
30 disease.[22-23] Subjects who presented with rapidly progressive IP at the first visit was  
31 included if radiological and/or pathological usual interstitial pneumonia (UIP) with no  
32 identifiable causes was confirmed. Only the first episode of AE was eligible if it was  
33 repeatedly manifested. The primary outcomes were short-term all-cause mortality and  
34 pulmonary-cause mortality, which were defined as in-hospital or 30-day mortality. The  
35 secondary outcomes were the proportion of patients discharged from the hospital and  
36 long-term all-cause mortality, which was determined at 90 days (3 months), 180 days (6  
37 months) or 1 year after the diagnosis of the disease. Long-term health-related quality of  
38 life (hQOL) was also considered as the secondary outcome. All primary study types  
39 excluding case reports were considered for the review if quantitative data was available  
40 for any clinical information that had been investigated for their association with the  
41 outcomes. Editorials, letters, review articles and conference proceedings were not  
42 considered. Only research papers published in English in 2002 or later were reviewed as  
43 2002 marked the year when the current classification system of IIPs was first  
44 introduced.[24]  
45  
46  
47  
48  
49  
50  
51  
52  
53  
54

### 55 Search strategy



1  
2  
3  
4  
5  
6 Electronic databases, i.e., Medline (Ovid), EMBASE (Ovid) and Science Citation Index  
7 Expanded (Web of Science) were searched using subject headings and text words  
8 related to study population such as 'idiopathic pulmonary fibrosis' and 'acute  
9 exacerbation' (e-Appendix). The search was conducted on the 1<sup>st</sup> of March 2019. The  
10 reference lists of eligible studies and relevant review articles were also hand-searched to  
11 find additional reports. Grey literature was identified using Google Scholar.[25]  
12  
13  
14

#### 15 Study selection and data extraction

16  
17 Two reviewers (H.K. and O.M.P.) independently examined the titles and abstracts of all  
18 retrieved articles to identify eligible reports. Data was extracted based on a modified  
19 data extraction form, which was previously published in a protocol paper reviewing  
20 prognostic factors.[26] Extracted data included first author's name, year of publication,  
21 study location, study design, sample size and their demographic features, outcomes,  
22 potential prognostic factors and their effect estimates, methods for statistical analysis  
23 and items associated with risk of bias. Any uncertainties or disagreements between  
24 reviewers arising from these processes were resolved through discussions. Authors were  
25 contacted to inquire about uncertain data or request for additional relevant information.  
26  
27  
28  
29  
30  
31

#### 32 Potential prognostic factors

33  
34 Any clinical information relevant to the pre-defined outcomes, which was reported by a  
35 minimum of three separate studies using either univariate or multivariate analysis, was  
36 further investigated as potential prognostic factors for this review. If the same research  
37 group reported a certain potential prognostic factor for a certain outcome in multiple  
38 studies, only the result derived from the study with the largest sample size was  
39 considered.  
40  
41  
42

#### 43 Risk of bias in individual studies

44  
45 The Quality in Prognostic Studies (QUIPS) tool was applied to assess risk of bias in  
46 individual studies. Overall risk of bias was rated as previously reported.[27]  
47  
48

#### 49 Statistical analysis

##### 50 *Summary statistics and statistical synthesis*

51  
52 The effect of potential prognostic factors was summarized with hazard ratios (HRs),  
53 odds ratios (ORs) or mean difference (MD) depending on the types of available data. If  
54 an association between a potential prognostic factor and an outcome of interest was  
55 presented using the same summary statistics in three or more studies, the results were  
56  
57  
58  
59  
60

1  
2  
3  
4  
5  
6 statistically combined. Pooled results were summarized separately using HRs, ORs or  
7 MD. If the unit of MD varied between studies, standardized MD (SMD) was calculated  
8 for meta-analysis.[28] Only unadjusted effect estimates of potential prognostic factors  
9 were combined and the effect estimates derived from multivariate models were  
10 described qualitatively. If meta-analysis was feasible from the collated data, it was  
11 conducted using a random-effects model employing the DerSimonian and Laird  
12 method.[29] Meta-analysis was conducted using the statistical software package,  
13 Review Manager (RevMan) Version 5.3 (Copenhagen: The Nordic Cochrane Centre,  
14 The Cochrane Collaboration, 2014). All the results were presented with the 95%  
15 confidence interval (CI) if available and the 95% prediction interval (PI) was also  
16 calculated if the effect estimates were pooled and there was heterogeneity between  
17 studies.[30] Statistical significance was considered with a p-value of <0.05. If  
18 combining data was deemed inappropriate (due to a small number of studies or  
19 substantial clinical or methodological variability between studies), the results were  
20 reported qualitatively.  
21  
22  
23  
24  
25  
26  
27  
28

### 29 *Heterogeneity*

30  
31 Between-study variance was estimated using the Tau<sup>2</sup> value and assessed using both Q  
32 statistic and I<sup>2</sup> value. For the assessment of heterogeneity between studies, statistical  
33 significance was considered with a p-value of <0.1 due to the low power of the test.  
34 Magnitude of heterogeneity was categorised as mild (0 to 30%), moderate (30 to 50%),  
35 considerable (50 to 70%) and substantial (70 to 100%).[31] To better interpret sources  
36 of heterogeneity, a subgroup analysis was to be conducted based on the definition of AE  
37 of IPF (idiopathic or triggered),[8] study location (Asia or non-Asia) and sample sizes  
38 (N≤50 or N>50) if there was statistically significant heterogeneity. As mortality was  
39 defined at a varied point in time by an individual study, it was also considered in  
40 subgroup analysis. Sensitivity analysis was to be conducted focusing on studies with  
41 low risk of bias.  
42  
43  
44  
45  
46  
47

### 48 *Small study bias*

49  
50 Small study bias such as publication bias was to be examined using graphical  
51 asymmetry of a funnel plot and the Egger's test,[32] if 10 or more studies were  
52 available for meta-analysis. A p-value of <0.1 was considered as statistical significance  
53 due to the low power of the test. If publication bias was suspected, an adjusted summary  
54 effect was to be estimated using the trim and fill method.[33]  
55  
56  
57  
58  
59  
60

## Confirmation of prognostic factors

Prognostic factors were confirmed if their effects were in the same direction and statistically significant in the majority of studies by both univariate and multivariate analyses. If a meta-analysis was conducted, its pooled effect was assigned to each study constituting the analysis in estimating the significance and consistency of individual studies. In other words, the effect estimate of individual studies was overridden by the result of meta-analysis to calculate the number of significant and consistent studies.

## Confidence in cumulative evidence

The credibility of evidence generated from this systematic review was assessed by the Grades of Recommendation, Assessment, Development and Evaluation (GRADE) system.[34] The GRADE system was applied to the final list of confirmed prognostic factors generated from both univariate and multivariate results.

## Results

### Search strategy

A total of 6763 reports were identified through Medline, EMBASE, Science Citation Index Expanded and Google Scholar. After excluding 1368 duplicates, 79 non-English records, 3293 reports of ineligible study types (consisting of 1353 conference proceedings, 1068 review articles, 294 editorials or letters and 578 case reports) and 1917 articles that did not relate to the topic of interest, the remaining 106 reports were obtained as full-texts. Out of these, 69 reports were excluded due to no prognosis in 43 studies, IP other than IPF in 12 studies, deterioration other than acute exacerbation in 3 studies, an inclusion of stable IPF in 5 studies, multiple episodes of AE in one study and no quantitative data in 5 studies. Finally, 37 articles/studies [35-71] were eligible for this review (e-Figure 1, e-Table 1). No additional reports were identified from other potential sources.

### Overview of included studies and potential prognostic factors

A total of 34 studies were conducted in Asia. Out of them the majority of studies took place in Japan (n=27), followed by Korea (n=6) and China (n=1). Two of the remaining 3 studies were conducted in Italy and the other one was in Greece. Twenty-three studies and one study utilized a retrospective and a prospective cohort study design,

1  
2  
3  
4  
5  
6 respectively, and the rest used a case-control design. Twenty-four studies had a sample  
7 size of  $\leq 50$  participants and the other 13 studies had 51 to 100 participants, which  
8 yielded a total number of 1607 patients included in this review. The outcomes were all-  
9 cause mortality in 35 studies and disease-related mortality in 2 studies. The measure of  
10 hQOL was also described in one study. A total of 8 research groups conducted multiple  
11 studies using the same cohort and published reports (Collard 2010,[40] Kim 2006,[50]  
12 Lee 2012 [54] and Song 2011[62]; Kishaba 2018 [51] and Kishaba 2014 [52]; Enomoto  
13 2015,[41] Enomoto 2018 [42] and Enomoto2019 [43]; Furuya 2017,[45] Isshiki  
14 2015,[46] Koyama 2017 [53] and Sakamoto 2018 [59]; Nikaido 2018 [55] and Sand  
15 2018 [60]; Kataoka 2015,[48] Suzuki 2018 [64] and Yokoyama 2010 [71]; Abe 2012  
16 [35] and Atsumi 2018 [38]; Tomioka 2007 [66] and Yamazoe 2018 [70]) (e-Table 1).  
17 Among these multiple research conducted by the same groups the study with the largest  
18 sample size was prioritized and a total of 30 potential prognostic factors, which were  
19 investigated for their association with all-cause mortality, were identified and followed  
20 by further analysis (e-Table 2).  
21  
22  
23  
24  
25  
26  
27  
28

### 29 Risk of bias

30  
31  
32 The rate of attrition was not explicitly stated and this could have biased the results in  
33 most of the cohort studies. There was also high risk of bias regarding confounding,  
34 statistical analysis and reporting in most of the studies. This was determined on the  
35 ground that many potential confounders were not addressed or insufficient detail was  
36 provided to describe the models used for the analysis. Consequently, all studies were  
37 rated as being subject to some methodological flaws (e-Table 3).  
38  
39  
40  
41

### 42 Statistical analysis

#### 43 *Confirmation of prognostic factors*

44  
45  
46 All potential prognostic factors were reported using univariate analysis in three or more  
47 studies. Meta-analysis was conducted for 17 out of the total of 30 potential prognostic  
48 factors. The effect estimates of the following 6 factors were in the same direction and  
49 statistically significant in the majority of the studies by univariate analysis. These  
50 prognostic factors were as follows; Acute Physiology and Chronic Health Evaluation  
51 (APACHE) II score, partial pressure of arterial oxygen to fraction of inspired oxygen  
52 (PaO<sub>2</sub>/FiO<sub>2</sub>) ratio, C-reactive protein (CRP), lactate dehydrogenase (LDH), white  
53 blood cell (WBC) and oxygen therapy before AE (e-Table 4). Out of the total of 30  
54  
55  
56  
57  
58  
59  
60

1  
2  
3  
4  
5  
6 potential prognostic factors, 20 were reported by multivariate analysis, mostly derived  
7 from only one or two studies. Among them, the effect estimates for 10 factors were in  
8 the same direction and statistically significant in the majority of the studies. These  
9 prognostic factors were as follows; APACHE II score, distribution pattern of newly  
10 emerging radiological opacities and extent of abnormality on high resolution computed  
11 tomography (HRCT) scan, PaO<sub>2</sub>/FiO<sub>2</sub> ratio, LDH, Krebs von den Lungen-6 (KL-6),  
12 WBC, D-dimer, neutrophil in bronchoalveolar fluid (BAL), oxygen therapy before AE  
13 (e-Table 5). Based on the criteria of prognostic factors that considered both univariate  
14 and multivariate analyses, 5 factors were confirmed as prognostic factors. The results of  
15 the other non-prognostic factors were described in a supplementary file (e-Table 4-5, e-  
16 Figure 2-20).

### 23 *Effect of prognostic factors*

24  
25  
26 A total of four studies reported APACHE II score using univariate analysis and the  
27 results of three studies were combined. Based on the combined result, APACHE II  
28 score was significantly associated with all-cause mortality of AE of IPF with an HR of  
29 1.09 (95%CI: 1.04-1.15) (Figure 1). The remaining one study excluded from meta-  
30 analysis demonstrated a higher APACHE II score for non-survivors although it was not  
31 statistically significant (MD 2.80 (95%CI: -1.19-6.79) (Nikaido 2018 [55]) (e-Table 4).  
32 A multivariate analysis reported by one study demonstrated a significant result with an  
33 HR of 1.10 (95%CI: 1.10-1.19) (Kawamura 2017 [49]) (e-Table 5).

34  
35  
36 A total of 15 studies reported PaO<sub>2</sub>/FiO<sub>2</sub> ratio using univariate analysis. The results of  
37 six studies were combined using an HR while those of other three and four studies were  
38 combined using an OR and MD, respectively. Based on the combined results,  
39 PaO<sub>2</sub>/FiO<sub>2</sub> ratio was significantly associated with all-cause mortality of AE of IPF with  
40 an HR of 0.95 (95%CI: 0.92-0.97) (Figure 2) and an OR of 0.92 (95%CI: 0.89-0.95)  
41 (Figure 3). Another result of meta-analysis demonstrated a marginal significance with  
42 an MD of -76.3 (95%CI: -153.9-1.28) (Figure 4). Of the remaining two studies excluded  
43 from meta-analysis, one study reported a non-significant lower PaO<sub>2</sub>/FiO<sub>2</sub> ratio for  
44 non-survivors than survivors (195 vs. 240) (Novelli 2016 [56]) whereas the other study  
45 demonstrated a point estimate in the opposite direction from the other studies with no  
46 statistical significance (HR 1.45 (95%CI: 0.71-3.03)) (Sokai 2017 [62]) (e-Table 4). A  
47 total of five studies reported PaO<sub>2</sub>/FiO<sub>2</sub> ratio using multivariate analysis. PaO<sub>2</sub>/FiO<sub>2</sub>  
48 ratio was demonstrated to be significantly associated with all-cause mortality in four  
49  
50  
51  
52  
53  
54  
55  
56  
57  
58  
59  
60

1  
2  
3  
4  
5  
6 studies with ORs of 0.99 (95%CI: 0.98-1.00) (Kang 2018 [47]) and 0.99 (95%CI: 0.99-  
7 1.00) (Sakamoto 2018 [59]) and HRs of 0.99 (95%CI: 0.99-1.00) (Kishaba 2018 [51])  
8 and 0.31 (95%CI: 0.14-0.67) (Suzuki 2018 [64]), respectively. In another study, the  
9 effect estimate was null value with no statistical significance (Yamazoe 2018 [70]) (e-  
10 Table 5).  
11  
12

13  
14 A total of 13 studies reported LDH using univariate analysis. The results of seven  
15 studies were combined using an HR while those of other four studies were combined  
16 using an SMD. Based on the combined results, LDH was significantly associated with  
17 all-cause mortality of AE of IPF with an HR of 1.02 (95%CI: 1.01-1.02) (Figure 5) and  
18 an SMD of 0.48 (0.11-0.84) (Figure 6), respectively. The remaining two studies  
19 excluded from meta-analysis demonstrated similar non-significant results with ORs of  
20 1.02 (95%CI: 1.00-1.04) (Kang 2018 [47]) and 1.01 (95%CI: 1.00-1.01) (Sakamoto  
21 2018 [59]), respectively (e-Table 4). A total of four studies reported LDH using  
22 multivariate analysis. LDH was demonstrated to be significantly associated with all-  
23 cause mortality in three studies with HRs of 1.002 (95%CI: 1.000-1.004) (Akira 2008  
24 [36]), 1.003 (95%CI: 1.001-1.005) (Kishaba 2018 [51]) and 1.01 (95%CI: 1.00-1.01)  
25 (Enomoto 2018 [42]), respectively. The other one study demonstrated non-significant  
26 result with an OR of 1.00 (95%CI: 1.00-1.00) (Kang 2018 [47]) (e-Table 5).  
27  
28  
29  
30  
31  
32  
33  
34

35 A total of 10 studies reported WBC using univariate analysis and the results of six  
36 studies were combined. Based on the combined result, non-survivors demonstrated a  
37 significantly higher value of WBC than survivors with an MD of 1.35 (95%CI: 0.19-  
38 2.51) (Figure 7). All of the remaining four studies excluded from meta-analysis  
39 demonstrated a point estimate of null value (e-Table 4). A multivariate analysis reported  
40 by one study demonstrated that WBC was significantly associated with all-cause  
41 mortality of AE of IPF with an OR of 1.38 (95%CI: 1.04-1.83) (Yamazoe 2018 [70]) (e-  
42 Table 5).  
43  
44  
45  
46  
47

48 A total of four studies reported oxygen therapy before AE using univariate analysis and  
49 the results of all these studies were combined. Based on the combined result, oxygen  
50 therapy before AE was significantly associated with all-cause mortality of AE of IPF  
51 with an HR of 1.88 (95%CI: 1.15-3.09) (Figure 8). A multivariate analysis reported by  
52 two studies demonstrated that oxygen therapy before AE was significantly associated  
53 with all-cause mortality of AE of IPF with HRs of 3.68 (95%CI: 1.05-12.9) (Enomoto  
54 2018 [42]) and 2.34 (95%CI: 1.04-5.28) (Sokai 2017 [62]), respectively (e-Table 5).  
55  
56  
57  
58  
59  
60

## Additional analysis

There was substantial heterogeneity in the result of meta-analysis using an MD for PaO<sub>2</sub>/FiO<sub>2</sub> ratio ( $\chi^2=32.91$ ,  $p<0.00001$ ,  $I^2=91\%$ ) (Figure 4). There was no variability in the location of study, the number of participants and diagnostic criteria for AE. All studies were conducted in Japan and included 50 or fewer patients who were diagnosed by nearly the same criteria. However, the effect of one study (Tsushima 2014 [67]) was extremely different from that of the other three studies. Meta-analysis excluding this study generated a significant result with an MD of -117.7 (95%CI: -148.0--87.5) and no heterogeneity was identified ( $\chi^2=1.69$ ,  $p=0.43$ ,  $I^2=0\%$ ) (e-Figure 21).

Two additional subgroup analyses were conducted for non-prognostic factors (e-Figure 15, 17) but sensitivity analysis was not undertaken due to the small number of studies with low risk of bias. Small study bias including publication bias could not be assessed because the designated minimum number of studies ( $\geq 10$ ) was not available for meta-analysis of any prognostic factor.

## Quality of evidence

The GRADE system rated the quality of evidence for identified prognostic factors as either low or very low (e-Table 6).

## Discussion

This systematic review and meta-analysis elucidated clinical information predictive of all-cause mortality of AE of IPF based on both univariate and multivariate analyses. These prognostic factors consisted of APACHE II score, PaO<sub>2</sub>/FiO<sub>2</sub> ratio, LDH, WBC and oxygen therapy before AE. The knowledge of prognostic factors, which are composed of clinical information that is easily accessible in daily clinical practice, will be of great help in developing therapeutic strategies for this intractable disease and can be very informative to patients and families in facilitating their decision-making.

Among the identified prognostic factors in this study, oxygen therapy before the development of AE suggests that the disease has already been in an advanced stage and there remains the limited capacity of the lung. The PaO<sub>2</sub>/FiO<sub>2</sub> ratio reflects the extent of the damage to the pulmonary parenchyma and the severity of the disease. LDH is a ubiquitous molecule distributed over the body and increases in bloodstream after tissue

1  
2  
3  
4  
5  
6 destruction.[72] Accordingly, a higher value of LDH may indicate extensive damage in  
7 the lung although LDH is not a specific marker for pulmonary disease. A non-specific  
8 inflammatory maker such as WBC elevates when the body is exposed to external  
9 stressful circumstances.[73] Therefore, an elevation of WBC may reflect the severity of  
10 the disease although it may possibly be an indicator of occult infection that could not be  
11 identified by ordinary diagnostic procedures. Acute physiologic scoring system such as  
12 APACHE II score is usually applied to in-patients in intensive care unit to assess the  
13 severity of their conditions. It is an established tool and known to correlate to the  
14 prognosis of the disease.[74] Although this system is composed of multiple factors that  
15 are not directly caused by the disease localized to the lung, such as renal dysfunction  
16 and electrolyte disturbance, the wide range of respiratory indexes is also included as its  
17 components. As a result, a higher value of APACHE II score may indicate respiratory  
18 distress caused by severely damaged pulmonary parenchyma.

19  
20  
21  
22  
23  
24  
25  
26 Overall, all of these prognostic factors are indicating progressive or severe disease state.  
27 They are analogous to those of other IPs.[75-76] In particular, oxygenation at  
28 presentation is reported to be predictive of the prognosis of the disease.[18] However,  
29 pulmonary function was not deemed as a prognostic factor in this study. This difference  
30 may suggest that the severity of the insult at the onset of AE is more closely associated  
31 with the subsequent clinical course of the disease. On the other hand, pulmonary state  
32 before AE may foretell the development of this devastating condition.[77] There was  
33 also no association between radiological findings and all-cause mortality of AE of IPF  
34 in this review and this was inconsistent with the reports of other IPs.[75-76] In contrast  
35 to the implication of baseline pulmonary function, radiological findings at the  
36 development of AE may directly reflect the damaged area of pulmonary parenchyma.  
37 AE of IPs can be pathologically classified into diffuse alveolar damage (DAD),  
38 organizing pneumonia (OP) and fibroblastic foci.[78] The prognosis of AE is reported  
39 to be closely related to these pathological patterns. In short, DAD demonstrates the  
40 worst prognosis.[79] However, these pathological findings are not necessarily correlated  
41 to radiological findings.[80] This may account for the finding of this review that no  
42 radiological findings were deemed as prognostic of all-cause mortality of AE of IPF.

43  
44  
45  
46  
47  
48  
49  
50  
51  
52  
53 The methodology of this review may have affected the selection and confirmation of  
54 prognostic factors although it had been reported in a protocol paper beforehand.[21]  
55 Potential prognostic factors were defined as any clinical information reported in three or  
56 more studies assuming that frequent reports would likely imply clinical relevance.  
57  
58  
59  
60



1  
2  
3  
4  
5  
6 However, this arbitrary definition may have missed other potential prognostic factors. In  
7 addition, prognostic factors were confirmed by the results of both univariate and  
8 multivariate analyses based on statistical significance and the effect estimates in the  
9 same direction in the majority of included studies. However, multivariate analysis was  
10 conducted in a small number of studies. As a result, all of the prognostic factors in this  
11 review were determined based on the results of only a few or several studies, which may  
12 have turned out to be statistically significant by chance or non-significant due to low  
13 statistical power.  
14  
15  
16  
17

18  
19 There is also some caveat that needs to be kept in mind to interpret the findings of this  
20 review. First, each study included in this review reported all-cause mortality at an  
21 arbitrary point in time such as in-hospital, 30 days, 90 days and overall. However,  
22 subgroup analysis was limited due to a small number of studies included for meta-  
23 analysis. Instead, causative clinical and/or methodological differences were sought to be  
24 identified qualitatively if there was statistically significant heterogeneity between  
25 studies. Second, most of the studies in this review were conducted in Japan. This  
26 finding may be related to the fact that AE of IPF was first reported by Japanese research  
27 group [7] and subsequently investigated vigorously in Japan.[81] In addition, it is  
28 reported that Japanese patients would more frequently develop progressive IP secondary  
29 to other medical conditions such as connective tissue disease [82] and drug toxicity.[83]  
30 Therefore, it is possible that Japanese people may be genetically more susceptible to AE  
31 of IPF, which may have led to more reports from Japan although the incidence of AE is  
32 reported to be similar between ethnicities.[84] However, this unbalanced report will  
33 limit an applicability of the findings of this review as they were mostly derived from  
34 data of Japanese patients. Therefore, further research needs to be conducted in other  
35 countries or regions to confirm the generalizability of the result of this study. Finally,  
36 the quality of evidence of this review was deemed low or very low for all prognostic  
37 factors by the GRADE system. This is because of methodological shortcomings in all  
38 studies and publication bias, which was assumed to be present in prognostic studies.[34]  
39 Therefore, further research of high quality is imperative to make a definitive conclusion.  
40  
41  
42  
43  
44  
45  
46  
47  
48  
49  
50

## 51 **Conclusion**

52  
53  
54 This systematic review and meta-analysis demonstrated that APACHE II score,  
55 PaO<sub>2</sub>/FiO<sub>2</sub> ratio, LDH, WBC and oxygen therapy before AE were deemed as  
56 prognostic factors of AE of IPF. However, the findings should be interpreted with  
57  
58  
59  
60

1  
2  
3  
4  
5  
6 caution because the quality of evidence was rated low or very low and the applicability  
7 is mostly restricted to Japanese patients.  
8  
9

### 10 **Ethics approval and participant consent**

11  
12  
13 Neither ethics approval nor participant consent was required as this study was based  
14 solely on the summary results of previously published articles. Individual patient data  
15 were not obtained or accessed.  
16  
17

### 18 **Data sharing**

19  
20  
21 The dataset used and/or analyzed for this review will be available from the  
22 corresponding author upon a reasonable request and may become open to the public  
23 through a digital repository (such as Dryad) after the final result is published in a  
24 journal.  
25  
26  
27  
28

### 29 **Conflict of interest**

30  
31  
32  
33 None to declare.  
34  
35  
36

### 37 **Funding**

38  
39  
40 This research received no specific grant from any funding agency in either the public,  
41 commercial, or not-for-profit sectors.  
42  
43

### 44 **Authors' contributions**

45  
46  
47 H.K. planned the entire research project and analysed the data. He also summarized the  
48 result and wrote the manuscript. H.K. has full access to the data and takes responsibility  
49 for its integrity as well as the accuracy of the analysis.  
50  
51

52  
53 O.M.P. contributed to the design of the research project and conducted the literature  
54 search and data extraction. He was also involved in revising the manuscript.  
55  
56

57 All researchers provided thoughts and opinions to compile a draft paper with revisions  
58 and then approved of the final version of the manuscript.  
59  
60

## References

1. Travis WD, Costabel U, Hansell DM, et al. An official American Thoracic Society/European Respiratory Society statement: update of the international multidisciplinary classification of the idiopathic interstitial pneumonias. *Am J Respir Crit Care Med* 2013;188:733-48.
2. American Thoracic Society. Idiopathic pulmonary fibrosis: diagnosis and treatment. International consensus statement. *Am J Respir Crit Care Med* 2000;161:646-64.
3. King TE, Jr. Clinical advances in the diagnosis and therapy of the interstitial lung diseases. *Am J Respir Crit Care Med* 2005;172:268-79.
4. Panos RJ, Mortenson RL, Niccoli SA, et al. Clinical deterioration in patients with idiopathic pulmonary fibrosis: causes and assessment. *Am J Med* 1990;88:396-404.
5. Raghu G, Amatto VC, Behr J, et al. Comorbidities in idiopathic pulmonary fibrosis patients: a systematic literature review. *Eur Respir J* 2015;46:1113-30.
6. Ley B, Collard HR, King TE, Jr. Clinical course and prediction of survival in idiopathic pulmonary fibrosis. *Am J Respir Crit Care Med* 2011;183:431-40.
7. Kondoh Y, Taniguchi H, Kawabata Y, et al. Acute exacerbation in idiopathic pulmonary fibrosis. Analysis of clinical and pathologic findings in three cases. *Chest* 1993;103:1808-12.
8. Collard HR, Ryerson CJ, Corte TJ, et al. Acute Exacerbation of Idiopathic Pulmonary Fibrosis. An international working group report. *Am J Respir Crit Care Med* 2016;194:265-75.
9. Kim DS. Acute exacerbation of idiopathic pulmonary fibrosis. *Clin Chest Med* 2012;33:59-68.
10. Qiu M, Chen Y, Ye Q. Risk factors for acute exacerbation of idiopathic pulmonary fibrosis: a systematic review and meta-analysis. *Clin Respir J* 2018;12:1084-92.
11. Raghu G, Collard HR, Egan JJ, et al. An official ATS/ERS/JRS/ALAT statement: idiopathic pulmonary fibrosis: evidence-based guidelines for diagnosis and management. *Am J Respir Crit Care Med* 2011;183:788-824.
12. Ambrosini V, Cancellieri A, Chilosi M, et al. Acute exacerbation of idiopathic pulmonary fibrosis: report of a series. *Eur Resp J* 2003;22:821-6.

13. Tachikawa R, Tomii K, Ueda H, et al. Clinical features and outcome of acute exacerbation of interstitial pneumonia: collagen vascular diseases-related versus idiopathic. *Respiration* 2012;83:20-7.
14. Mann CJ. Observational research methods. Research design II: cohort, cross sectional, and case-control studies. *Emerg Med J* 2003;20:54-60.
15. Riley RD, Hayden JA, Steyerberg EW, et al. Prognosis research strategy (PROGRESS) 2: prognostic factor research. *PLoS Med* 2013;10:e1001380.
16. Simon-Blancal V, Freynet O, Nunes H, et al. Acute exacerbation of idiopathic pulmonary fibrosis: outcome and prognostic factors. *Respiration* 2012;83:28-35.
17. Agarwal R, Jindal SK. Acute exacerbation of idiopathic pulmonary fibrosis: a systematic review. *Eur J Intern Med* 2008;19:227-35.
18. Kamiya H, Panlaqui OM, Izumi S, et al. Systematic review and meta-analysis of prognostic factors for idiopathic inflammatory myopathy-associated interstitial lung disease. *BMJ Open* 2018;8:e023998.
19. Moher D, Liberati A, Tetzlaff J, et al. Preferred reporting items for systematic reviews and meta-analyses: the PRISMA statement. *Ann Intern Med* 2009;151:264-9.
20. Stroup DF, Berlin JA, Morton SC, et al. Meta-analysis of observational studies in epidemiology: a proposal for reporting. Meta-analysis of observational studies in epidemiology (MOOSE) group. *JAMA* 2000;283:2008-12.
21. Kamiya H, Panlaqui OM. Prognostic factors for acute exacerbation of idiopathic pulmonary fibrosis: protocol for a systematic review and meta-analysis. *BMJ Open* 2019;9:e028226.
22. Collard HR, Moore BB, Flaherty KR, et al. Acute exacerbations of idiopathic pulmonary fibrosis. *Am J Respir Crit Care Med* 2007;176:636-43.
23. Raghu G, Remy-Jardin M, Myers JL, et al. Diagnosis of idiopathic pulmonary fibrosis. An official ATS/ERS/JRS/ALAT clinical practice guideline. *Am J Respir Crit Care Med* 2018;198:e44-e68.
24. American Thoracic Society. American Thoracic Society/European Respiratory Society international multidisciplinary consensus classification of the idiopathic interstitial pneumonias. *Am J Respir Crit Care Med* 2002;165:277-304.
25. Haddaway NR, Collins AM, Coughlin D, et al. The role of google scholar in evidence reviews and its applicability to grey literature searching. *PLoS One*. 2015;10:e0138237.
26. Kamiya H, Panlaqui OM. Prognostic significance of autoantibodies for idiopathic pulmonary fibrosis: protocol for a systematic review. *BMJ Open* 2018;8:e020862.

- 1
- 2
- 3
- 4
- 5
- 6 27. Hayden JA, Cote P, Bombardier C. Evaluation of the quality of prognosis
- 7 studies in systematic reviews. *Ann Intern Med* 2006;144:427-37.
- 8
- 9 28. Hedges LV. Distribution theory for Glass's estimator of effect size and related
- 10 estimators. *J Educ Behav Stat* 1981;6:107-28.
- 11
- 12 29. DerSimonian R, Laird N. Meta-analysis in clinical trials. *Control Clin Trials*
- 13 1986;7:177-88.
- 14
- 15 30. Riley RD, Higgins JP, Deeks JJ. Interpretation of random effects meta-
- 16 analyses. *BMJ* 2011;342:d549.
- 17
- 18 31. Higgins JPT, Green S, eds. *Cochrane Handbook for Systematic Reviews of*
- 19 *Interventions Version 5.1.0 [updated March 2011]*. The Cochrane Collaboration 2011.
- 20 Available from: <http://www.handbook.cochrane.org>.
- 21
- 22 32. Egger M, Davey Smith G, Schneider M, et al. Bias in meta-analysis detected
- 23 by a simple, graphical test. *BMJ* 1997;315:629-34.
- 24
- 25 33. Duval S, Tweedie R. Trim and fill: a simple funnel-plot-based method of
- 26 testing and adjusting for publication bias in meta-analysis. *Biometrics* 2000;56:455-63.
- 27
- 28 34. Iorio A, Spencer FA, Falavigna M, et al. Use of GRADE for assessment of
- 29 evidence about prognosis: rating confidence in estimates of event rates in broad
- 30 categories of patients. *BMJ* 2015;350:h870.
- 31
- 32 35. Abe S, Azuma A, Mukae H, et al. Polymyxin B-immobilized fiber column
- 33 (PMX) treatment for idiopathic pulmonary fibrosis with acute exacerbation: a
- 34 multicenter retrospective analysis. *Intern Med* 2012;51:1487-91.
- 35
- 36 36. Akira M, Kozuka T, Yamamoto S, et al. Computed tomography findings in
- 37 acute exacerbation of idiopathic pulmonary fibrosis. *Am J Respir Crit Care Med*
- 38 2008;178:372-8.
- 39
- 40 37. Anzai M, Fukushima Y, Obara K, et al. Clinical characteristics of acute
- 41 exacerbations of idiopathic pulmonary fibrosis and involvement of viral, mycoplasma
- 42 pneumoniae, and chlamydophila pneumoniae infections. *Dokkyo J Med Sci* 2013;40:9-
- 43 16.
- 44
- 45 38. Atsumi K, Saito Y, Kuse N, et al. Prognostic factors in the acute exacerbation
- 46 of idiopathic pulmonary fibrosis: a retrospective single-center study. *Intern Med*
- 47 2018;57:655-61.
- 48
- 49 39. Cao M, Swigris JJ, Wang X, et al. Plasma leptin is elevated in acute
- 50 exacerbation of idiopathic pulmonary fibrosis. *Mediators Inflamm* 2016;6940480.
- 51
- 52 40. Collard HR, Calfee CS, Wolters PJ, et al. Plasma biomarker profiles in acute
- 53 exacerbation of idiopathic pulmonary fibrosis. *Am J Physiol Lung Cell Mol Physiol*
- 54 2010;299:L3-7.
- 55
- 56
- 57
- 58
- 59
- 60

41. Enomoto N, Mikamo M, Oyama Y, et al. Treatment of acute exacerbation of idiopathic pulmonary fibrosis with direct hemoperfusion using a polymyxin B-immobilized fiber column improves survival. *BMC Pulm Med* 2015;15:15.
42. Enomoto N, Oyama Y, Enomoto Y, et al. Prognostic evaluation of serum ferritin in acute exacerbation of idiopathic pulmonary fibrosis. *Clin Respir J* 2018;12:2378-89.
43. Enomoto N, Oyama Y, Enomoto Y, et al. Differences in clinical features of acute exacerbation between connective tissue disease-associated interstitial pneumonia and idiopathic pulmonary fibrosis. *Chronic Respir Dis* 2019;16:1479972318809476.
44. Fujimoto K, Taniguchi H, Johkoh T, et al. Acute exacerbation of idiopathic pulmonary fibrosis: high-resolution CT scores predict mortality. *Eur Radiol* 2012;22:83-92.
45. Furuya K, Sakamoto S, Shimizu H, et al. Pirfenidone for acute exacerbation of idiopathic pulmonary fibrosis: a retrospective study. *Respir Med* 2017;126:93-9.
46. Isshiki T, Sakamoto S, Kinoshita A, et al. Recombinant human soluble thrombomodulin treatment for acute exacerbation of idiopathic pulmonary fibrosis: a retrospective study. *Respiration* 2015;89:201-7.
47. Kang HS, Cho KW, Kwon SS, et al. Prognostic significance of Glasgow prognostic score in patients with acute exacerbation of idiopathic pulmonary fibrosis. *Respirology* 2018;23:206-12.
48. Kataoka K, Taniguchi H, Kondoh Y, et al. Recombinant human thrombomodulin in acute exacerbation of idiopathic pulmonary fibrosis. *Chest* 2015;148:436-43.
49. Kawamura K, Ichikado K, Yasuda Y, et al. Azithromycin for idiopathic acute exacerbation of idiopathic pulmonary fibrosis: a retrospective single-center study. *BMC Pulm Med* 2017;17:94.
50. Kim D, Park J, Park B, et al. Acute exacerbation of idiopathic pulmonary fibrosis: frequency and clinical features. *Eur Resp J* 2006;27:143-50.
51. Kishaba T, Nei Y, Momose M, et al. Clinical characteristics based on the new criteria of acute exacerbation in patients with idiopathic pulmonary fibrosis. *Eurasian J Med* 2018;50:6-10.
52. Kishaba T, Tamaki H, Shimaoka Y, et al. Staging of acute exacerbation in patients with idiopathic pulmonary fibrosis. *Lung* 2014;192:141-9.
53. Koyama K, Sakamoto S, Isshiki T, et al. The activities of daily living after an acute exacerbation of idiopathic pulmonary fibrosis. *Intern Med* 2017;56:2837-43.

- 1  
2  
3  
4  
5  
6 54. Lee JS, Song JW, Wolters PJ, et al. Bronchoalveolar lavage pepsin in acute  
7 exacerbation of idiopathic pulmonary fibrosis. *Eur Resp J* 2012;39:352-8.  
8  
9 55. Nikaido T, Tanino Y, Wang X, et al. Serum decorin is a potential prognostic  
10 biomarker in patients with acute exacerbation of idiopathic pulmonary fibrosis. *J*  
11 *Thorac Dis* 2018;10:5346-58.  
12  
13 56. Novelli L, Ruggiero R, De Giacomo F, et al. Corticosteroid and  
14 cyclophosphamide in acute exacerbation of idiopathic pulmonary fibrosis: a single  
15 center experience and literature review. *Sarcoidosis Vasc Diffuse Lung Dis*  
16 2016;33:385-91.  
17  
18 57. Oishi K, Aoe K, Mimura Y, et al. Survival from an acute exacerbation of  
19 idiopathic pulmonary fibrosis with or without direct hemoperfusion with a polymyxin  
20 B-immobilized fiber column: a retrospective analysis. *Intern Med* 2016;55:3551-9.  
21  
22 58. Papis SA, Kagouridis K, Kolilekas L, et al. Survival in idiopathic pulmonary  
23 fibrosis acute exacerbations: the non-steroid approach. *BMC Pulm Med* 2015;15:162.  
24  
25 59. Sakamoto S, Shimizu H, Isshiki T, et al. Recombinant human soluble  
26 thrombomodulin for acute exacerbation of idiopathic pulmonary fibrosis: A historically  
27 controlled study. *Respir Investig* 2018;56:136-43.  
28  
29 60. Sand JMB, Tanino Y, Karsdal MA, et al. A serological biomarker of versican  
30 degradation is associated with mortality following acute exacerbations of idiopathic  
31 interstitial pneumonia. *Respir Res* 2018;19:82.  
32  
33 61. Saraya T, Kimura H, Kurai D, et al. Clinical significance of respiratory virus  
34 detection in patients with acute exacerbation of interstitial lung diseases. *Respir Med*  
35 2018;136:88-92.  
36  
37 62. Sokai A, Tanizawa K, Handa T, et al. Asymmetry in acute exacerbation of  
38 idiopathic pulmonary fibrosis. *ERS Open Res* 2017;3:00036-2016.  
39  
40 63. Song JW, Hong S-B, Lim C-M, et al. Acute exacerbation of idiopathic  
41 pulmonary fibrosis: incidence, risk factors and outcome. *Eur Resp J* 2011;37:356-63.  
42  
43 64. Suzuki A, Taniguchi H, Ando M, et al. Prognostic evaluation by oxygenation  
44 with positive end-expiratory pressure in acute exacerbation of idiopathic pulmonary  
45 fibrosis: a retrospective cohort study. *Clin Respir J* 2018;12:895-903.  
46  
47 65. Takei R, Arita M, Kumagai S, et al. Impact of lymphocyte differential count >  
48 15% in BALF on the mortality of patients with acute exacerbation of chronic fibrosing  
49 idiopathic interstitial pneumonia. *BMC Pulm Med* 2017;17:67.  
50  
51 66. Tomioka H, Sakurai T, Hashimoto K, et al. Acute exacerbation of idiopathic  
52 pulmonary fibrosis: role of chlamydomydia pneumoniae infection. *Respirology*  
53 2007;12:700-6.  
54  
55  
56  
57  
58  
59  
60

67. Tsushima K, Yamaguchi K, Kono Y, et al. Thrombomodulin for acute exacerbations of idiopathic pulmonary fibrosis: a proof of concept study. *Pulm Pharmacol and Ther* 2014;29:233-40.
68. Vianello A, Molena B, Turato C, et al. Pirfenidone improves the survival of patients with idiopathic pulmonary fibrosis hospitalized for acute exacerbation. *Curr Med Res Opin* 2019;35:1187-90.
69. Wootton SC, Kim DS, Kondoh Y, et al. Viral infection in acute exacerbation of idiopathic pulmonary fibrosis. *Am J Respir Crit Care Med* 2011;183:1698-702.
70. Yamazoe M, Tomioka H. Acute exacerbation of idiopathic pulmonary fibrosis: a 10-year single-centre retrospective study. *BMJ Open Respir Res* 2018;5:e000342.
71. Yokoyama T, Kondoh Y, Taniguchi H, et al. Noninvasive ventilation in acute exacerbation of idiopathic pulmonary fibrosis. *Intern Med* 2010;49:1509-14.
72. Szucs MM, Brooks HL, Grossman W, et al. Diagnostic sensitivity of laboratory findings in acute pulmonary embolism. *Ann Intern Med* 1971;74:161-+.
73. Ware LB, Matthay MA. The acute respiratory distress syndrome. *N Engl J Med* 2000;342:1334-49.
74. Knaus WA, Draper EA, Wagner DP, et al. APACHE II: a severity of disease classification system. *Crit Care Med* 1985;13:818-29.
75. Winstone TA, Assayag D, Wilcox PG, et al. Predictors of mortality and progression in scleroderma-associated interstitial lung disease: a systematic review. *Chest* 2014;146:422-36.
76. Assayag D, Lubin M, Lee JS, et al. Predictors of mortality in rheumatoid arthritis-related interstitial lung disease. *Respirology* 2014;19:493-500.
77. Kondoh Y, Taniguchi H, Katsuta T, et al. Risk factors of acute exacerbation of idiopathic pulmonary fibrosis. *Sarcoidosis Vasc Diffuse Lung Dis* 2010;27:103-10.
78. Churg A, Muller NL, Silva CI, et al. Acute exacerbation (acute lung injury of unknown cause) in UIP and other forms of fibrotic interstitial pneumonias. *Am J Surg Pathol* 2007;31:277-84.
79. Parambil JG, Myers JL, Ryu JH. Histopathologic features and outcome of patients with acute exacerbation of idiopathic pulmonary fibrosis undergoing surgical lung biopsy. *Chest* 2005;128:3310-5.
80. Silva CIS, Muller NL, Fujimoto K, et al. Acute exacerbation of chronic interstitial pneumonia - high-resolution computed tomography and pathologic findings. *J Thorac Imaging* 2007;22:221-9.
81. Homma S, Bando M, Azuma A, et al. Japanese guideline for the treatment of idiopathic pulmonary fibrosis. *Respir Investig* 2018;56:268-91.



- 1  
2  
3  
4  
5  
6 82. Koga T, Fujikawa K, Horai Y, et al. The diagnostic utility of anti-melanoma  
7 differentiation-associated gene 5 antibody testing for predicting the prognosis of  
8 Japanese patients with DM. *Rheumatology* 2012;51:1278-84.  
9  
10 83. Inokuma S. Leflunomide-induced interstitial pneumonitis might be a  
11 representative of disease-modifying antirheumatic drug-induced lung injury. *Expert*  
12 *Opin Drug Saf* 2011;10:603-11.  
13  
14 84. Collard HR, Richeldi L, Kim DS, et al. Acute exacerbations in the INPULSIS  
15 trials of nintedanib in idiopathic pulmonary fibrosis. *Eur Respir J* 2017;49:1601339.  
16  
17  
18  
19  
20  
21  
22  
23  
24  
25  
26  
27  
28  
29  
30  
31  
32  
33  
34  
35  
36  
37  
38  
39  
40  
41  
42  
43  
44  
45  
46  
47  
48  
49  
50  
51  
52  
53  
54  
55  
56  
57  
58  
59  
60

e-Table 1 Characteristics of 37 studies included for the review

| Study                 | Country | Study design            | Patients (n) (M/F) | Age (years) <sup>a</sup>   | Smoking (n (%))                               | Follow-up lengths                  | Outcome                                   | Number of deaths (%) <sup>b</sup>             |
|-----------------------|---------|-------------------------|--------------------|----------------------------|-----------------------------------------------|------------------------------------|-------------------------------------------|-----------------------------------------------|
| Abe 2012<br>[35]      | Japan   | Case-control            | 73 (58/15)         | 67.5±8.2                   | Mean 937 (SD 658)<br>(Smoking index)          | -                                  | All-cause mortality<br>(3-month)          | 48 (65.8)                                     |
| Akira 2008<br>[36]    | Japan   | Prospective<br>cohort   | 58 (44/14)         | Median 66<br>(Range 45-82) | 43 (74.1)                                     | -                                  | All-cause mortality<br>(In-hospital)      | 25 (43.1)                                     |
| Anzai 2013<br>[37]    | Japan   | Case-control            | 50 (41/9)          | 71.0±7.1 <sup>c</sup>      | (74.0)                                        | -                                  | All-cause mortality<br>(Overall)          | 29 (58.0)                                     |
| Atsumi 2018<br>[38]   | Japan   | Retrospective<br>cohort | 59 (49/10)         | Median 74<br>(IQR 66-78)   | Median 800 (IQR 500-1200)<br>(Brinkman index) | -                                  | All-cause mortality<br>(60-day)           | 54 (91.5)                                     |
| Cao 2016<br>[39]      | China   | Case-control            | 30 (23/7)          | 65.0±9.4                   | 9 (30.0)                                      | -                                  | All-cause mortality<br>(Overall)          | 26 (86.7)                                     |
| Collard 2010<br>[40]  | Korea   | Retrospective<br>cohort | 47 (36/11)         | 66.0±8.0                   | 40 (85.1)                                     | -                                  | All-cause mortality<br>(Overall)          | 24 (51.1)                                     |
| Enomoto 2015<br>[41]  | Japan   | Retrospective<br>cohort | 31 (28/3)          | Median 69<br>(Range 50-84) | 27 (87.1)                                     | Median 53 months<br>(Range 2-205)  | All-cause mortality<br>(3-month/12-month) | 12 (38.7) (3 months)<br>23 (74.2) (12 months) |
| Enomoto 2018<br>[42]  | Japan   | Retrospective<br>cohort | 37                 | -                          | -                                             | -                                  | All-cause mortality<br>(3-month)          | 10 (27.0)                                     |
| Enomoto 2019<br>[43]  | Japan   | Retrospective<br>cohort | 37                 | -                          | -                                             | -                                  | All-cause mortality<br>(3-month)          | 7 (18.9)                                      |
| Fujimoto 2012<br>[44] | Japan   | Retrospective<br>cohort | 60 (49/11)         | Median 71<br>(IQR 63-75)   | 48 (80.0)                                     | Median 370 days<br>(Range 39-1230) | Disease-related mortality<br>(Overall)    | 48 (80.0)                                     |

|    |               |       |               |            |                       |            |                    |                     |           |
|----|---------------|-------|---------------|------------|-----------------------|------------|--------------------|---------------------|-----------|
| 1  |               |       |               |            |                       |            |                    |                     |           |
| 2  |               |       |               |            |                       |            |                    |                     |           |
| 3  |               |       |               |            |                       |            |                    |                     |           |
| 4  |               |       |               |            |                       |            |                    |                     |           |
| 5  | Furuya 2017   | Japan | Retrospective | 47 (42/5)  | Range 64-84           | -          | Median 173 days    | All-cause mortality | 27 (57.4) |
| 6  | [45]          |       | cohort        |            |                       |            | (Range 4-1137)     | (Overall)           |           |
| 7  |               |       |               |            |                       |            |                    |                     |           |
| 8  | Isshiki 2015  | Japan | Retrospective | 41 (36/5)  | 72.6±6.4              | 36 (87.8)  | Median 12 months   | All-cause mortality | 29 (70.7) |
| 9  | [46]          |       | cohort        |            |                       |            | (Range 1-143)      | (Overall)           |           |
| 10 |               |       |               |            |                       |            |                    |                     |           |
| 11 | Kang 2018     | Korea | Case-control  | 66 (36/30) | 70.8±9.0 <sup>e</sup> | 30 (45.5)  | -                  | All-cause mortality | 29 (43.9) |
| 12 | [47]          |       |               |            |                       |            |                    | (In-hospital)       |           |
| 13 |               |       |               |            |                       |            |                    |                     |           |
| 14 | Kataoka 2015  | Japan | Case-control  | 40 (36/4)  | Mean 72               | -          | -                  | All-cause mortality | 19 (47.5) |
| 15 | [48]          |       |               |            | (IQR 66-78)           |            |                    | (3-month)           |           |
| 16 |               |       |               |            |                       |            |                    |                     |           |
| 17 | Kawamura 2017 | Japan | Retrospective | 85 (66/19) | Median 76             | -          | -                  | All-cause mortality | 43 (50.6) |
| 18 | [49]          |       | cohort        |            | (IQR 70-80)           |            |                    | (60-day)            |           |
| 19 |               |       |               |            |                       |            |                    |                     |           |
| 20 | Kim 2006      | Korea | Case-control  | 11         | 63.4±6.3              | 6 (75.0)   | -                  | All-cause mortality | 7 (63.6)  |
| 21 | [50]          |       |               |            | (n=8)                 | (n=8)      |                    | (In-hospital)       |           |
| 22 |               |       |               |            |                       |            |                    |                     |           |
| 23 | Kishaba 2018  | Japan | Retrospective | 65 (40/25) | 74.7±11.3             | 37 (56.9)  | -                  | All-cause mortality | -         |
| 24 | [51]          |       | cohort        |            |                       |            |                    | (3-month)           |           |
| 25 |               |       |               |            |                       |            |                    |                     |           |
| 26 | Kishaba 2014  | Japan | Retrospective | 58 (38/20) | 75.0±9.6              | 58 (100.0) | Median 10.2 months | All-cause mortality | - (70.7)  |
| 27 | [52]          |       | cohort        |            |                       |            | (Range 0.1-112)    | (3-month)           |           |
| 28 |               |       |               |            |                       |            |                    |                     |           |
| 29 | Koyama 2017   | Japan | Case-control  | 47 (42/5)  | Median 74             | 42 (89.4)  | -                  | All-cause mortality | 19 (40.4) |
| 30 | [53]          |       |               |            | (Range 58-86)         |            |                    | (3-month)           |           |
| 31 |               |       |               |            |                       |            |                    | Quality of life     |           |
| 32 |               |       |               |            |                       |            |                    |                     |           |
| 33 | Lee 2012      | Korea | Retrospective | 24 (19/5)  | 64.3±9.4 <sup>e</sup> | 19 (79.2)  | Median 74 days     | All-cause mortality | 20 (83.3) |
| 34 | [54]          |       | cohort        |            |                       |            | (IQR15-492)        | (Overall)           |           |
| 35 |               |       |               |            |                       |            |                    |                     |           |
| 36 | Nikaido 2018  | Japan | Case-control  | 21 (21/0)  | 69.7±6.7 <sup>e</sup> | -          | -                  | All-cause mortality | 7 (33.3)  |
| 37 | [55]          |       |               |            |                       |            |                    | (60-day)            |           |
| 38 |               |       |               |            |                       |            |                    |                     |           |

|    |               |        |               |            |                       |           |                  |                           |               |
|----|---------------|--------|---------------|------------|-----------------------|-----------|------------------|---------------------------|---------------|
| 1  | Novelli 2016  | Italy  | Retrospective | 11 (7/4)   | Median 65             | 8 (72.7)  | Median 18 months | All-cause mortality       | - (27.0)      |
| 2  | [56]          |        | cohort        |            | (IQR 55-75)           |           |                  | (3-month)                 |               |
| 3  | Oishi 2016    | Japan  | Retrospective | 50 (46/4)  | 71.7±6.1              | 42 (84.0) | Median 42 days   | Disease-related mortality | 38 (76.0)     |
| 4  | [57]          |        | cohort        |            |                       |           | (Range 1-1656)   | (Overall)                 |               |
| 5  | Papiris 2015  | Greece | Retrospective | 17         | -                     | -         | -                | All-cause mortality       | 11 (39.3)     |
| 6  | [58]          |        | cohort        |            |                       |           |                  | (Overall)                 |               |
| 7  | Sakamoto 2018 | Japan  | Retrospective | 80 (68/12) | 72.9±6.3              | 67 (83.8) | Median 13 months | All-cause mortality       | - (46.3)      |
| 8  | [59]          |        | cohort        |            |                       |           | (Range 1-137)    | (3-month)                 |               |
| 9  | Sand 2018     | Japan  | Retrospective | 28 (28/0)  | 71.0±7.0              | 23 (82.1) | -                | All-cause mortality       | 13 (46.4)     |
| 10 | [60]          |        | cohort        |            |                       |           |                  | (Overall)                 | (at 100 days) |
| 11 | Saraya 2018   | Japan  | Retrospective | 27 (18/9)  | Median 74             | 16 (66.7) | -                | All-cause mortality       | 8 (29.6)      |
| 12 | [61]          |        | cohort        |            | (IQR 70-84)           | (n=24)    |                  | (60-day)                  |               |
| 13 | Sokai 2017    | Japan  | Retrospective | 59 (54/5)  | 71.7±8.2              | 49 (83.1) | -                | All-cause mortality       | - (59.2)      |
| 14 | [62]          |        | cohort        |            |                       |           |                  | (180-day)                 |               |
| 15 | Song 2011     | Korea  | Case-control  | 90 (69/21) | 65.3±7.9              | 59 (65.6) | -                | All-cause mortality       | 45 (50.0)     |
| 16 | [63]          |        |               |            |                       |           |                  | (In-hospital)             |               |
| 17 | Suzuki 2018   | Japan  | Retrospective | 62 (56/6)  | Median 71             | 50 (80.6) | -                | All-cause mortality       | 32 (51.6)     |
| 18 | [64]          |        | cohort        |            | (IQR 64.8-76)         |           |                  | (90-day)                  |               |
| 19 | Takei 2017    | Japan  | Case-control  | 18         | -                     | -         | -                | All-cause mortality       | -             |
| 20 | [65]          |        |               |            |                       |           |                  | (90-day/Overall)          |               |
| 21 | Tomioka 2007  | Japan  | Case-control  | 27 (18/9)  | Mean 71               | 20 (74.1) | -                | All-cause mortality       | 15 (55.6)     |
| 22 | [66]          |        |               |            | (Range 60-85)         |           |                  | (In-hospital)             |               |
| 23 | Tsushima 2014 | Japan  | Case-control  | 20 (14/6)  | 76.8±1.9 <sup>c</sup> | -         | -                | All-cause mortality       | 7 (35.0)      |

1  
2  
3  
4  
5  
6  
7  
8  
9  
10  
11  
12  
13  
14  
15  
16  
17  
18  
19  
20  
21  
22  
23  
24  
25  
26  
27  
28  
29  
30  
31  
32  
33  
34  
35  
36  
37  
38  
39  
40  
41  
42  
43  
44  
45  
46

|               |       |                      |              |                        |          |                  |                                           |           |               |
|---------------|-------|----------------------|--------------|------------------------|----------|------------------|-------------------------------------------|-----------|---------------|
| [67]          |       |                      |              |                        |          |                  |                                           | (28-day)  |               |
| Vianello 2019 | Italy | Retrospective cohort | 20 (15/5)    | 67.0±10.4 <sup>c</sup> | 9 (45.0) | Maximum 370 days | All-cause mortality (In-ICU /Overall)     | 10 (50.0) | (In-ICU)      |
| [68]          |       |                      |              |                        |          |                  |                                           |           |               |
| Woottoon 2011 | Korea | Retrospective cohort | 43 (88%/12%) | Mean 65                | (84.0)   | -                | All-cause mortality (60-day/Overall)      | - (51.2)  | (60 days)     |
| [69]          |       |                      |              |                        |          |                  |                                           |           |               |
| Yamazoe 2018  | Japan | Retrospective cohort | 57           |                        | -        | -                | All-cause mortality (In-hospital/Overall) | 35 (61.4) | (In-hospital) |
| [70]          |       |                      |              |                        |          |                  |                                           |           |               |
| Yokoyama 2010 | Japan | Case-control         | 11 (7/4)     | 72.3±7.7               | 8 (72.7) | -                | All-cause mortality (3-month)             | 6 (54.5)  |               |
| [71]          |       |                      |              |                        |          |                  |                                           |           |               |

a, indicates mean±standard deviation unless otherwise specified; b, indicates the number of deaths at each point in time unless otherwise specified; c, calculated using the sample size and median, range or interquartile range in two comparative groups;

IQR, interquartile range;

e-Table 2 30 potential prognostic factors for all-cause mortality

|                                                                                                                   |
|-------------------------------------------------------------------------------------------------------------------|
| Demographic characteristics                                                                                       |
| age, sex, smoking history, BMI, disease duration                                                                  |
| Disease severity (staging) of underlying IPF or acute phase                                                       |
| GAP system, JRS classification, APACHE II score                                                                   |
| Symptoms                                                                                                          |
| Duration of dyspnoea, fever                                                                                       |
| Pulmonary function tests (at baseline)                                                                            |
| FVC, DLCO, FEV1                                                                                                   |
| Radiological features                                                                                             |
| Pattern of distribution, GGO, reticular opacity, extent of abnormality                                            |
| Laboratory findings                                                                                               |
| PaO <sub>2</sub> /FiO <sub>2</sub> ratio, CRP, LDH, KL-6, SP-D, WBC, D-dimer, FDP, BAL lymphocyte, BAL neutrophil |
| Treatment before acute exacerbation                                                                               |
| Pirfenidone, corticosteroid, oxygen therapy                                                                       |

APACHE, acute physiology and chronic health evaluation; BAL, bronchoalveolar lavage; BMI, body mass index; CRP, C-reactive protein; DLCO, diffusion capacity of the lung for carbon monoxide; FDP, fibrin degradation product; FEV1, forced expiratory volume in one second; FVC, forced vital capacity; GAP, gender, age and physiology; GGO, ground glass opacity; HR, hazard ratio; HRCT, high resolution computed tomography; IPF, idiopathic pulmonary fibrosis; JRS, Japanese Respiratory Society; KL-6, Krebs von den Lungen-6; LDH, lactate dehydrogenase; PaO<sub>2</sub>/FiO<sub>2</sub>, partial pressure of arterial oxygen/fraction of inspired oxygen; SP-D, surfactant protein-D; WBC, white blood cell;

1  
2  
3  
4  
5  
6  
7  
8  
9  
10  
11  
12  
13  
14  
15  
16  
17  
18  
19  
20  
21  
22  
23  
24  
25  
26  
27  
28  
29  
30  
31  
32  
33  
34  
35  
36  
37  
38  
39  
40  
41  
42  
43  
44  
45  
46

e-Table 3 Risk of bias in 37 studies included for the review, assessed by the Quality in Prognostic Studies tool<sup>a</sup>

| Study              | study participation | study attrition  | prognostic factor measurement | outcome measurement | study confounding | statistical analysis and reporting |
|--------------------|---------------------|------------------|-------------------------------|---------------------|-------------------|------------------------------------|
| Abe 2012 [35]      | <b>high risk</b>    | low risk         | <b>high risk</b>              | low risk            | <b>high risk</b>  | <b>high risk</b>                   |
| Akira 2008 [36]    | medium risk         | low risk         | low risk                      | low risk            | medium risk       | <b>high risk</b>                   |
| Anzai 2013 [37]    | low risk            | low risk         | medium risk                   | low risk            | medium risk       | <b>high risk</b>                   |
| Atsumi 2018 [38]   | low risk            | low risk         | low risk                      | low risk            | medium risk       | <b>high risk</b>                   |
| Cao 2016 [39]      | medium risk         | low risk         | low risk                      | low risk            | <b>high risk</b>  | <b>high risk</b>                   |
| Collard 2010 [40]  | medium risk         | <b>high risk</b> | medium risk                   | low risk            | <b>high risk</b>  | <b>high risk</b>                   |
| Enomoto 2015 [41]  | medium risk         | <b>high risk</b> | medium risk                   | low risk            | medium risk       | <b>high risk</b>                   |
| Enomoto 2018 [42]  | medium risk         | <b>high risk</b> | low risk                      | low risk            | medium risk       | <b>high risk</b>                   |
| Enomoto 2019 [43]  | medium risk         | <b>high risk</b> | medium risk                   | low risk            | medium risk       | <b>high risk</b>                   |
| Fujimoto 2012 [44] | low risk            | <b>high risk</b> | low risk                      | low risk            | <b>high risk</b>  | medium risk                        |
| Furuya 2017 [45]   | low risk            | <b>high risk</b> | low risk                      | low risk            | <b>high risk</b>  | <b>high risk</b>                   |
| Isshiki 2015 [46]  | low risk            | <b>high risk</b> | low risk                      | low risk            | medium risk       | <b>high risk</b>                   |
| Kang 2018 [47]     | low risk            | low risk         | low risk                      | low risk            | <b>high risk</b>  | <b>high risk</b>                   |
| Kataoka 2015 [48]  | low risk            | low risk         | medium risk                   | low risk            | <b>high risk</b>  | medium risk                        |
| Kawamura 2017 [49] | low risk            | low risk         | low risk                      | low risk            | <b>high risk</b>  | <b>high risk</b>                   |
| Kim 2006 [50]      | medium risk         | low risk         | <b>high risk</b>              | low risk            | medium risk       | <b>high risk</b>                   |
| Kishaba 2018 [51]  | low risk            | <b>high risk</b> | medium risk                   | low risk            | <b>high risk</b>  | <b>high risk</b>                   |

|    |                    |                  |                  |                  |          |                  |                  |
|----|--------------------|------------------|------------------|------------------|----------|------------------|------------------|
| 1  |                    |                  |                  |                  |          |                  |                  |
| 2  |                    |                  |                  |                  |          |                  |                  |
| 3  |                    |                  |                  |                  |          |                  |                  |
| 4  |                    |                  |                  |                  |          |                  |                  |
| 5  | Kishaba 2014 [52]  | medium risk      | <b>high risk</b> | medium risk      | low risk | medium risk      | <b>high risk</b> |
| 6  | Koyama 2017 [53]   | low risk         | low risk         | medium risk      | low risk | <b>high risk</b> | <b>high risk</b> |
| 7  | Lee 2012 [54]      | low risk         | <b>high risk</b> | low risk         | low risk | <b>high risk</b> | <b>high risk</b> |
| 8  | Nikaido 2018 [55]  | low risk         | low risk         | low risk         | low risk | <b>high risk</b> | <b>high risk</b> |
| 9  | Novelli 2016 [56]  | medium risk      | <b>high risk</b> | low risk         | low risk | <b>high risk</b> | <b>high risk</b> |
| 10 | Oishi 2016 [57]    | medium risk      | <b>high risk</b> | medium risk      | low risk | <b>high risk</b> | <b>high risk</b> |
| 11 | Papiris 2015 [58]  | low risk         | <b>high risk</b> | low risk         | low risk | medium risk      | <b>high risk</b> |
| 12 | Sakamoto 2018 [59] | low risk         | <b>high risk</b> | low risk         | low risk | medium risk      | <b>high risk</b> |
| 13 | Sand 2018 [60]     | medium risk      | <b>high risk</b> | low risk         | low risk | <b>high risk</b> | <b>high risk</b> |
| 14 | Saraya 2018 [61]   | medium risk      | <b>high risk</b> | low risk         | low risk | <b>high risk</b> | <b>high risk</b> |
| 15 | Sokai 2017 [62]    | low risk         | <b>high risk</b> | low risk         | low risk | medium risk      | medium risk      |
| 16 | Song 2011 [63]     | medium risk      | low risk         | medium risk      | low risk | <b>high risk</b> | <b>high risk</b> |
| 17 | Suzuki 2018 [64]   | low risk         | <b>high risk</b> | low risk         | low risk | <b>high risk</b> | medium risk      |
| 18 | Takei 2017 [65]    | medium risk      | low risk         | low risk         | low risk | <b>high risk</b> | <b>high risk</b> |
| 19 | Tomioka 2007 [66]  | low risk         | low risk         | low risk         | low risk | <b>high risk</b> | <b>high risk</b> |
| 20 | Tsushima 2014 [67] | medium risk      | low risk         | low risk         | low risk | <b>high risk</b> | <b>high risk</b> |
| 21 | Vianello 2019 [68] | <b>high risk</b> | <b>high risk</b> | low risk         | low risk | <b>high risk</b> | <b>high risk</b> |
| 22 | Wootton 2011 [69]  | medium risk      | <b>high risk</b> | medium risk      | low risk | <b>high risk</b> | <b>high risk</b> |
| 23 | Yamazoe 2018 [70]  | low risk         | <b>high risk</b> | low risk         | low risk | <b>high risk</b> | medium risk      |
| 24 | Yokoyama 2010 [71] | medium risk      | low risk         | <b>high risk</b> | low risk | <b>high risk</b> | <b>high risk</b> |

a, Text in bold refers to high risk of bias.



e-Table 4 The result of univariate analysis of potential prognostic factors for all-cause mortality

| Potential prognostic factors <sup>a</sup> | Analysis   | Studies (n) <sup>b</sup> | Subjects (n) | Point estimate (+/-) <sup>c</sup> | Result of meta-analysis and non-pooled studies (95% CI) <sup>d</sup> |
|-------------------------------------------|------------|--------------------------|--------------|-----------------------------------|----------------------------------------------------------------------|
| <b>Demographic features</b>               |            |                          |              |                                   |                                                                      |
| Age                                       | Meta       | 8                        | 405          | 4/2                               | HR 1.00 (0.98-1.02) (/1 year)                                        |
|                                           |            | 3                        | 236          | 3/0                               | OR 1.02 (0.98-1.05) (/1 year)                                        |
|                                           | Not pooled | Kishaba 2014 [52]        | 58           | -/-                               | HR 1.00 (p=0.83) (year)                                              |
|                                           |            | Anzai 2013 [37]          | 50           | 1/0                               | MD 3.50 (-0.48-7.48) (year) (non-survivor vs. survivor)              |
|                                           |            | Tsushima 2014 [67]       | 20           | 0/1                               | <b>MD -4.30 (-6.04--2.56) (yaer) (non-survivor vs. survivor)</b>     |
| Sex                                       | Meta       | 7                        | 377          | 3/4                               | HR 0.93 (0.65-1.34) (vs. female)                                     |
|                                           |            | 5                        | 306          | 3/2                               | OR 1.28 (0.74-2.21) (vs. female)                                     |
|                                           | Not pooled | Kishaba 2014 [52]        | 58           | 0/1                               | HR 0.90 (p=0.76)                                                     |
| Smoking history                           | Meta       | 3                        | 145          | 2/1                               | HR 0.98 (0.35-2.75) (vs. never-smoker)                               |
|                                           |            | 4                        | 243          | 3/1                               | OR 0.99 (0.59-1.67) (vs. never-smoker)                               |
|                                           |            | 3                        | 116          | 1/1                               | HR 1.00 (0.89-1.11) (/10 pack-year)                                  |
|                                           | Not pooled | Atsumi 2018 [38]         | 59           | 0/1                               | HR 0.95 (0.88-1.02) (/200 Brinkman index)                            |
|                                           |            | Kishaba 2014 [52]        | 58           | 1/0                               | <b>HR 1.01 (p=0.03) (pack-year)</b>                                  |
| BMI                                       | Not pooled | Kang 2018 [47]           | 66           | 0/1                               | MD -0.13 (-2.12-1.86) (non-survivor vs. survivor)                    |
|                                           |            | Suzuki 2018 [64]         | 62           | 1/0                               | HR 1.04 (0.94-1.15) (/1 kg/m <sup>2</sup> )                          |
|                                           |            | Lee 2012 [54]            | 24           | 0/1                               | HR 0.93 (0.82-1.05)                                                  |
| Disease duration before AE                | Not pooled | Papiris 2015 [58]        | 17           | 1/0                               | HR 1.01 (1.00-1.03)                                                  |
|                                           |            | Enomoto 2019 [43]        | 37           | -/-                               | HR 1.00 (p=0.82) (/1 month)                                          |
|                                           |            | Song 2011 [63]           | 90           | 0/1                               | OR 0.99 (0.98-1.01) (months)                                         |

|                                                             |            |                    |     |     |                                                                       |
|-------------------------------------------------------------|------------|--------------------|-----|-----|-----------------------------------------------------------------------|
|                                                             |            | Akira 2008 [36]    | 58  | 1/0 | MD 2.00 (-11.6-15.6) (months) (non-survivor vs. survivor)             |
|                                                             |            | Novelli 2016 [56]  | 11  | 0/1 | 8 vs. 20 (months) (non-survivor vs. survivor)                         |
| <hr/>                                                       |            |                    |     |     |                                                                       |
| Disease severity (staging) of underlying IPF or acute phase |            |                    |     |     |                                                                       |
| <hr/>                                                       |            |                    |     |     |                                                                       |
| GAP system <sup>e</sup>                                     | Not pooled | Atsumi 2018 [38]   | 59  | 1/0 | <b>HR 1.45 (1.10-1.93) (/1 point)</b>                                 |
|                                                             |            | Enomoto 2018 [42]  | 37  | 1/0 | HR 1.08 (0.48-2.44) (/1 stage)                                        |
|                                                             |            | Sakamoto 2018 [59] | 80  | 1/0 | OR 1.64 (0.98-2.70) (/1)                                              |
| JRS classification <sup>f</sup>                             | Not pooled | Atsumi 2018 [38]   | 59  | 1/0 | <b>HR 1.50 (1.17-1.94) (/1 stage)</b>                                 |
|                                                             |            | Enomoto 2018 [42]  | 37  | 1/0 | HR 2.12 (0.86-5.23)                                                   |
|                                                             |            | Sakamoto 2018 [59] | 80  | 1/0 | OR 1.28 (0.53-3.13) (advanced (III, IV))                              |
| <b>APACHE II score</b>                                      | Meta       | 3                  | 194 | 3/0 | <b>HR 1.09 (1.04-1.15) (/1 point)</b>                                 |
|                                                             | Not pooled | Nikaido 2018 [55]  | 21  | 1/0 | MD 2.80 (-1.19-6.79) (non-survivor vs. survivor)                      |
| <hr/>                                                       |            |                    |     |     |                                                                       |
| Symptoms                                                    |            |                    |     |     |                                                                       |
| <hr/>                                                       |            |                    |     |     |                                                                       |
| Duration of dyspnoea                                        | Not pooled | Song 2011 [63]     | 90  | 0/1 | <b>OR 0.94 (0.90-0.98) (days)</b>                                     |
|                                                             |            | Kishaba 2014 [52]  | 58  | 1/0 | HR 1.01 (p=0.65) (days)                                               |
|                                                             |            | Kang 2018 [47]     | 66  | 0/1 | MD -6.43 (-15.9-3.04) (days) (non-survivor vs. survivor)              |
| Fever                                                       | Meta       | 3                  | 206 | 2/1 | OR 1.66 (0.74-3.70)                                                   |
|                                                             | Not pooled | Enomoto 2019 [43]  | 37  | 0/1 | HR 0.51 (p=0.39)                                                      |
| <hr/>                                                       |            |                    |     |     |                                                                       |
| Pulmonary function                                          |            |                    |     |     |                                                                       |
| <hr/>                                                       |            |                    |     |     |                                                                       |
| FVC                                                         | Meta       | 5                  | 199 | 1/3 | HR 0.99 (0.98-1.01) (/1% predicted value)                             |
|                                                             |            | 3                  | 193 | 1/0 | OR 1.01 (0.99-1.02) (/1% predicted value)                             |
| DLCO                                                        | Meta       | 4                  | 171 | 1/2 | HR 0.99 (0.98-1.01) (/1% predicted value)                             |
|                                                             | Not pooled | Kang 2018 [47]     | 66  | 0/1 | MD -6.38 (-15.8-3.04) (% predicted value) (non-survivor vs. survivor) |
| <hr/>                                                       |            |                    |     |     |                                                                       |

1  
2  
3  
4  
5  
6  
7  
8  
9  
10  
11  
12  
13  
14  
15  
16  
17  
18  
19  
20  
21  
22  
23  
24  
25  
26  
27  
28  
29  
30  
31  
32  
33  
34  
35  
36  
37  
38  
39  
40  
41  
42  
43  
44  
45  
46

|                            |            |                    |     |     |                                                                       |
|----------------------------|------------|--------------------|-----|-----|-----------------------------------------------------------------------|
|                            |            | Sakamoto 2018 [59] | 80  | 1/0 | OR 1.01 (0.98-1.03)                                                   |
| FEV1                       | Not pooled | Kang 2018 [47]     | 66  | 0/1 | MD -4.36 (-14.1-5.37) (% predicted value) (non-survivor vs. survivor) |
|                            |            | Koyama 2017 [53]   | 47  | 0/1 | MD -11.0 (-23.8-1.82) (% predicted value) (non-survivor vs. survivor) |
|                            |            | Papiris 2015 [58]  | 17  | -/- | HR 1.00 (0.94-1.06) (% predicted value)                               |
| <b>Features on HRCT</b>    |            |                    |     |     |                                                                       |
| Pattern                    | Not pooled | Kim 2006 [50]      | 11  | 1/0 | OR 30.3 (0.96-959.6) (multifocal vs. peripheral)                      |
|                            |            | Anzai 2013 [37]    | 50  | 1/0 | OR 8.00 (0.82-78.0) (diffuse+multifocal vs. peripheral)               |
|                            |            | Sakamoto 2018 [59] | 80  | 1/0 | OR 1.39 (0.55-3.45) (diffuse)                                         |
|                            |            | Akira 2008 [36]    | 58  | 1/0 | <b>HR 5.39 (2.60-11.2) (diffuse+multifocal vs. peripheral)</b>        |
|                            |            | Kawamura 2017 [49] | 85  | 0/1 | HR 0.41 (0.10-1.71) (multifocal)                                      |
| GGO                        | Not pooled | Sokai 2017 [62]    | 59  | 1/0 | HR 1.01 (0.99-1.03)                                                   |
|                            |            | Papiris 2015 [58]  | 17  | 1/0 | HR 1.65 (0.74-3.70)                                                   |
|                            |            | Lee 2012 [54]      | 24  | 1/0 | HR 1.03 (1.00-1.06) (GGO score)                                       |
| Reticular opacity          | Not pooled | Akira 2008 [36]    | 58  | 1/0 | HR 1.03 (1.00-1.06) (reticulation and honeycombing (%))               |
|                            |            | Lee 2012 [54]      | 24  | 0/1 | HR 0.96 (0.91-1.01) (reticulation score)                              |
|                            |            | Kishaba 2014 [52]  | 58  | 1/0 | HR 1.32 (p=0.06) (traction bronchiectasis and honeycombing score)     |
|                            |            | Sokai 2017 [62]    | 59  | 0/1 | HR 0.98 (0.95-1.02) (reticulation and honeycombing (%))               |
| Extent of abnormality      | Meta       | 3                  | 120 | 3/0 | HR 1.02 (1.00-1.05) (/1 score)                                        |
|                            |            | Akira 2008 [36]    | 58  | 1/0 | <b>HR 1.07 (1.04-1.10) (%)</b>                                        |
| <b>Laboratory findings</b> |            |                    |     |     |                                                                       |
| <b>PaO2/FiO2 ratio</b>     | Meta       | 6                  | 325 | 0/5 | <b>HR 0.95 (0.92-0.97) (/10 mmHg)</b>                                 |
|                            |            | 3                  | 236 | 0/3 | <b>OR 0.92 (0.89-0.95) (/10 mmHg)</b>                                 |

|             |            |                    |     |     |                                                                        |
|-------------|------------|--------------------|-----|-----|------------------------------------------------------------------------|
|             |            | 4                  | 118 | 0/4 | MD -76.3 (-153.9-1.28) (non-survivor vs. survivor)                     |
|             | Not pooled | Novelli 2016 [56]  | 11  | 0/1 | 195 vs. 240 (non-survivor vs. survivor)                                |
|             |            | Sokai 2017 [62]    | 59  | 1/0 | HR 1.45 (0.71-3.03) ( $\geq 200$ )                                     |
| <b>CRP</b>  | Meta       | 4                  | 243 | 3/0 | <b>HR 1.05 (1.02-1.08) (/1mg/dl)</b>                                   |
|             |            | 6                  | 242 | 7/0 | <b>SMD 0.69 (0.19-1.18) (non-survivor vs. survivor)</b>                |
|             | Not pooled | Kishaba 2014 [52]  | 58  | 0/1 | HR 0.98 (p=0.47) (mg/dl)                                               |
|             |            | Song 2011 [63]     | 90  | 1/0 | <b>OR 1.09 (1.01-1.17) (mg/dl)</b>                                     |
|             |            | Sakamoto 2018 [59] | 80  | 1/0 | OR 1.05 (0.97-1.14) (mg/dl)                                            |
| <b>LDH</b>  | Meta       | 7                  | 425 | 6/0 | <b>HR 1.02 (1.01-1.02) (/10 IU/L)</b>                                  |
|             |            | 4                  | 118 | 4/0 | <b>SMD 0.48 (0.11-0.84) (non-survivor vs. survivor)</b>                |
|             | Not pooled | Kang 2018 [47]     | 66  | 1/0 | OR 1.02 (1.00-1.04)                                                    |
|             |            | Sakamoto 2018 [59] | 80  | 1/0 | OR 1.01 (1.00-1.01) (IU/L)                                             |
| <b>KL-6</b> | Meta       | 4                  | 265 | 3/0 | <b>HR 1.02 (1.01-1.04) (/100 U/mL)</b>                                 |
|             |            | 4                  | 118 | 2/2 | MD -23.6 (-119.7-72.5) ( $\times 10$ U/mL) (non-survivor vs. survivor) |
|             | Not pooled | Kishaba 2014 [52]  | 58  | 1/0 | <b>HR 2.01 (p=0.001) (IU/L)</b>                                        |
|             |            | Enomoto 2018 [42]  | 37  | -/- | HR 1.00 (1.00-1.00) (U/mL)                                             |
|             |            | Collard 2010 [40]  | 47  | 0/1 | OR 0.41 (0.06-2.93) (log unit)                                         |
|             |            | Sakamoto 2018 [59] | 80  | -/- | OR 1.00 (1.00-1.00) (U/mL)                                             |
| <b>SP-D</b> | Meta       | 4                  | 243 | 0/2 | HR 0.99 (0.99-1.00) (/10 ng/ml)                                        |
|             | Not pooled | Anzai 2013 [37]    | 50  | 1/0 | MD 25.0 (-155.6-205.6) (non-survivor vs. survivor) (ng/ml)             |
|             |            | Nikaido 2018 [55]  | 21  | 1/0 | MD 172.2 (-76.3-420.7) (non-survivor vs. survivor) (ng/ml)             |
|             |            | Collard 2010 [40]  | 47  | 1/0 | OR 1.23 (0.36-4.21) (log ng/ml)                                        |
|             |            | Sakamoto 2018 [59] | 80  | 1/0 | OR 1.01 (1.00-1.01) (ng/ml)                                            |

1  
2  
3  
4  
5  
6  
7  
8  
9  
10  
11  
12  
13  
14  
15  
16  
17  
18  
19  
20  
21  
22  
23  
24  
25  
26  
27  
28  
29  
30  
31  
32  
33  
34  
35  
36  
37  
38  
39  
40  
41  
42  
43  
44  
45  
46

|                            |            |                    |     |     |                                                                                               |
|----------------------------|------------|--------------------|-----|-----|-----------------------------------------------------------------------------------------------|
| <b>WBC</b>                 | Meta       | 6                  | 242 | 5/1 | <b>MD 1.35 (0.19-2.51) (<math>\times 10^6/\text{mm}^3</math>) (non-survivor vs. survivor)</b> |
|                            | Not pooled | Kataoka 2015 [48]  | 40  | -/- | OR 1.00 (1.00-1.00) (/mm <sup>3</sup> )                                                       |
|                            |            | Sakamoto 2018 [59] | 80  | -/- | OR 1.00 (1.00-1.00) (/mm <sup>3</sup> )                                                       |
|                            |            | Kishaba 2014 [52]  | 58  | -/- | HR 1.00 (p=0.47) (/mm <sup>3</sup> )                                                          |
|                            |            | Enomoto 2019 [43]  | 37  | -/- | <b>HR 1.00 (p=0.03) (/ul)</b>                                                                 |
| D-dimer                    | Not pooled | Suzuki 2018 [64]   | 62  | 1/0 | <b>HR 1.03 (1.01-1.05) (/1 <math>\mu\text{g/ml}</math>)</b>                                   |
|                            |            | Sakamoto 2018 [59] | 80  | 0/1 | OR 0.99 (0.94-1.04) (mg/ml)                                                                   |
|                            |            | Nikaido 2018 [55]  | 21  | 1/0 | MD 3.10 (-7.48-13.7) ( $\mu\text{g/ml}$ ) (non-survivor vs. survivor)                         |
| FDP                        | Not pooled | Nikaido 2018 [55]  | 21  | 1/0 | MD 3.0 (-21.6-27.6) ( $\mu\text{g/ml}$ ) (non-survivor vs. survivor)                          |
|                            |            | Tsushima 2014 [67] | 20  | 1/0 | <b>MD 115.6 (73.5-157.7) (<math>\mu\text{g/ml}</math>) (non-survivor vs. survivor)</b>        |
|                            |            | Sakamoto 2018 [59] | 80  | -/- | OR 1.00 (0.98-1.02) ( $\mu\text{g/ml}$ )                                                      |
| BAL lymphocyte             | Not pooled | Song 2011 [63]     | 90  | 0/1 | <b>OR 0.91 (0.83-0.99) (%)</b>                                                                |
|                            |            | Suzuki 2018 [64]   | 62  | 0/1 | HR 0.97 (0.92-1.01) (/1%)                                                                     |
|                            |            | Kishaba 2014 [52]  | 58  | -/- | HR 1.00 (p=0.97)                                                                              |
| BAL neutrophil             | Not pooled | Song 2011 [63]     | 90  | 1/0 | OR 1.06 (1.00-1.12) (%)                                                                       |
|                            |            | Suzuki 2018 [64]   | 62  | 1/0 | <b>HR 1.01 (1.00-1.03) (/1%)</b>                                                              |
|                            |            | Kishaba 2014 [52]  | 58  | 0/1 | HR 0.94 (p=0.33)                                                                              |
| <b>Treatment before AE</b> |            |                    |     |     |                                                                                               |
| Pirfenidone                | Meta       | 3                  | 164 | 3/0 | HR 1.34 (0.81-2.24)                                                                           |
|                            |            | Sakamoto 2018 [59] | 80  | 0/1 | OR 0.85 (0.28-2.56)                                                                           |
| Corticosteroid             | Meta       | 3                  | 161 | 2/1 | HR 0.96 (0.61-1.52)                                                                           |
|                            |            | Song 2011 [63]     | 90  | 0/1 | OR 0.83 (0.35-1.94) (corticosteroid with or without cytotoxic agent)                          |

|                       |      |               |     |     |                            |
|-----------------------|------|---------------|-----|-----|----------------------------|
|                       |      | Sakamoto [59] | 80  | 1/0 | OR 1.75 (0.64-4.76)        |
| <i>Oxygen therapy</i> | Meta | 4             | 160 | 4/0 | <b>HR 1.88 (1.15-3.09)</b> |

a, Text in italic bold refers to potential prognostic factors, which demonstrated consistent and statistically significant results in the majority of studies. If the result of meta-analysis was significant, all studies included for the analysis were assumed to be significant to determine whether the majority of studies demonstrated significant results.

b, The number of included studies was described for meta-analysis while an individual study was specified for non-pooled studies.

c, Plus (+) indicates a positive association between mortality and potential prognostic factors based on point estimates while minus (-) indicates the negative association. Studies with null effects such as zero by MDs and one by HRs were not counted in this column. The direction of point estimates of all pooled and non-pooled studies were considered.

d, Parenthesis indicates 95% confidence interval unless otherwise specified. Text in bold refers to statistically significant results. Per unit for relative values such as ORs and HRs was described only if data was available and otherwise only unit was described.

e, The system considers gender, age and two lung physiology variables, i.e., FVC and DLCO. Points are assigned to each component of the system and there are three stages depending on the total points with a higher value indicating severer disease.

f, The classification consists of PaO<sub>2</sub> at rest and minimum SpO<sub>2</sub> during the six-minute walking test. There are four stages based on a combination of the value of both PaO<sub>2</sub> and SpO<sub>2</sub> with a higher stage indicating severer disease.

AE, acute exacerbation; APACHE, acute physiology and chronic health evaluation; BAL, bronchoalveolar lavage; BMI, body mass index; CRP, C-reactive protein; CI, confidence interval; DLCO, diffusion capacity of the lung for carbon monoxide; FDP, fibrin degradation product; FEV1, forced expiratory volume in 1 second; FVC, forced vital capacity; GAP, gender, age and physiology; GGO, ground glass opacity; HR, hazard ratio; HRCT, high resolution computed tomography; IPF, idiopathic pulmonary fibrosis; KL-6, Krebs von den Lungen-6; LDH, lactate dehydrogenase; MD, mean difference; Meta, meta-analysis; OR, odds ratio; PaO<sub>2</sub>, partial pressure of

1  
2  
3  
4  
5  
6  
7  
8  
9  
10  
11  
12  
13  
14  
15  
16  
17  
18  
19  
20  
21  
22  
23  
24  
25  
26  
27  
28  
29  
30  
31  
32  
33  
34  
35  
36  
37  
38  
39  
40  
41  
42  
43  
44  
45  
46

arterial oxygen; PaO<sub>2</sub>/FiO<sub>2</sub> ratio, partial pressure of arterial oxygen/fraction of inspired oxygen ratio, SMD, standardized mean difference; SP-D, SpO<sub>2</sub>, saturation of percutaneous oxygen; surfactant protein-D; WBC, white blood cell;

For peer review only

e-Table 5 The result of multivariate analysis of potential prognostic factors for all-cause mortality

| Potential prognostic factors <sup>a</sup>                   | Studies (n)        | Subjects (n) | Effect estimates (95% CI) <sup>b</sup>                         |
|-------------------------------------------------------------|--------------------|--------------|----------------------------------------------------------------|
| Demographic features                                        |                    |              |                                                                |
| Age                                                         | Akira 2008 [36]    | 58           | HR 1.00 (0.96-1.04) (year)                                     |
|                                                             | Kang 2008 [47]     | 66           | OR 0.97 (0.91-1.04) (year)                                     |
|                                                             | Yamazoe 2018 [70]  | 57           | OR 0.96 (0.87-1.07) (year)                                     |
| Sex                                                         | Akira 2008 [36]    | 58           | HR 0.91 (0.34-2.43) (vs. female)                               |
| Smoking history                                             | Akira 2008 [36]    | 58           | HR 2.47 (0.91-6.70) (vs. never-smoker)                         |
|                                                             | Sokai 2017 [62]    | 59           | HR 0.51 (0.23-1.31)                                            |
| Disease severity (staging) of underlying IPF or acute phase |                    |              |                                                                |
| GAP system <sup>c</sup>                                     | Atsumi 2018 [38]   | 59           | HR 0.98 (0.62-1.51) (/1 point)                                 |
| <b>APACHE II score</b>                                      | Kawamura 2017 [49] | 85           | <b>HR 1.10 (1.10-1.19)</b>                                     |
| Symptoms                                                    |                    |              |                                                                |
| Fever                                                       | Kang 2018 [47]     | 66           | OR 1.35 (0.41-4.50)                                            |
| Pulmonary function                                          |                    |              |                                                                |
| FVC                                                         | Akira 2008 [36]    | 58           | HR 0.98 (0.96-1.01) (% predicted value)                        |
|                                                             | Kang 2018 [47]     | 66           | OR 1.00 (0.96-1.04) (% predicted value)                        |
| DLCO                                                        | Akira 2008 [36]    | 58           | HR 1.02 (1.00-1.04) (% predicted value)                        |
| Features on HRCT                                            |                    |              |                                                                |
| <b>Pattern</b>                                              | Akira 2008 [36]    | 58           | <b>HR 4.63 (1.90-11.3)</b> (diffuse+multifocal vs. peripheral) |
| GGO                                                         | Sokai 2017 [62]    | 59           | HR 0.99 (0.96-1.02)                                            |
| <b>Extent of abnormality</b>                                | Akira 2008 [36]    | 58           | <b>HR 1.07 (1.02-1.12) (%)</b>                                 |
|                                                             | Atsumi 2018 [38]   | 59           | HR 1.18 (0.99-1.39) (/10 score)                                |
|                                                             | Enomoto 2018 [42]  | 37           | <b>HR 1.22 (1.01-1.48) (score)</b>                             |
| Laboratory findings                                         |                    |              |                                                                |
| <b>PaO<sub>2</sub>/FiO<sub>2</sub> ratio</b>                | Kang 2018 [47]     | 66           | <b>OR 0.99 (0.98-1.00)</b>                                     |
|                                                             | Yamazoe 2018 [70]  | 57           | OR 1.00 (0.99-1.01)                                            |
|                                                             | Kishaba 2018 [51]  | 65           | <b>HR 0.99 (0.99-1.00)</b>                                     |
|                                                             | Suzuki 2018 [64]   | 62           | <b>HR 0.31 (0.14-0.67) (&gt;300 vs. ≤300)</b>                  |
|                                                             | Sakamoto 2018 [59] | 80           | <b>OR 0.99 (0.99-1.00)</b>                                     |
| CRP                                                         | Song 2011 [63]     | 90           | <b>OR 2.47 (1.03-5.91) (mg/dl)</b>                             |
|                                                             | Yamazoe 2018 [70]  | 57           | OR 1.00 (0.90-1.13) (mg/dl)                                    |
|                                                             | Kataoka 2015 [48]  | 40           | OR 1.18 (1.00-1.39) (mg/dl)                                    |



|                       |                   |    |                                       |
|-----------------------|-------------------|----|---------------------------------------|
| <i>LDH</i>            | Kang 2018 [47]    | 66 | OR 1.00 (1.00-1.00)                   |
|                       | Akira 2008 [36]   | 58 | <b>HR 1.002 (1.000-1.004)</b>         |
|                       | Kishaba 2018 [51] | 65 | <b>HR 1.003 (1.001-1.005) (IU/L)</b>  |
|                       | Enomoto 2018 [42] | 37 | <b>HR 1.01 (1.00-1.01) (IU/L)</b>     |
| <i>KL-6</i>           | Suzuki 2018 [64]  | 62 | <b>HR 1.24 (1.05-1.46) (/500U/mL)</b> |
|                       | Sokai 2017 [62]   | 59 | <b>HR 1.02 (1.00-1.05) (/100U/mL)</b> |
| <i>WBC</i>            | Yamazoe 2018 [70] | 57 | <b>OR 1.38 (1.04-1.83) (/μl)</b>      |
| <i>D-dimer</i>        | Suzuki 2018 [64]  | 62 | <b>HR 1.04 (1.02-1.06) (/1μg/mL)</b>  |
| BAL lymphocyte        | Song 2011 [63]    | 90 | OR 0.87 (0.74-1.02) (%)               |
| <i>BAL neutrophil</i> | Sokai 2017 [62]   | 59 | <b>HR 1.02 (1.00-1.03) (%)</b>        |
| Treatment before AE   |                   |    |                                       |
| <i>Oxygen therapy</i> | Enomoto 2018 [42] | 37 | <b>HR 3.68 (1.05-12.9)</b>            |
|                       | Sokai 2017 [62]   | 59 | <b>HR 2.34 (1.04-5.28)</b>            |

a, Text in italic bold refers to potential prognostic factors, which demonstrated consistent and statistically significant results in the majority of studies.

b, Parenthesis indicates 95% confidence interval unless otherwise specified. Text in bold refers to statistically significant results. Per unit for relative values such as ORs and HRs was described only if data was available and otherwise only unit was described.

c, The system considers gender, age and two lung physiology variables, i.e., FVC and DLCO. Points are assigned to each component of the system and there are three stages depending on the total points with a higher value indicating severer disease.

AE, acute exacerbation; APACHE, acute physiology and chronic health evaluation; BAL, bronchoalveolar lavage; CRP, C-reactive protein; CI, confidence interval; DLCO, diffusion capacity of the lung for carbon monoxide; FVC, forced vital capacity; GAP, gender, age and physiology; GGO, ground glass opacity; HR, hazard ratio; HRCT, high resolution computed tomography; KL-6, Krebs von den Lungen-6; LDH, lactate dehydrogenase; OR, odds ratio; PaO<sub>2</sub>/FiO<sub>2</sub> ratio, partial pressure of arterial oxygen/fraction of inspired oxygen, WBC, white blood cell

e-Table 6 Assessment of quality of evidence of prognostic factors by the Grades of Recommendation, Assessment, Development and Evaluation (GRADE) system

| Outcome: all-cause mortality             |                       |       |                   |                            |              |                  |             |                            |             |                 |
|------------------------------------------|-----------------------|-------|-------------------|----------------------------|--------------|------------------|-------------|----------------------------|-------------|-----------------|
| GRADE factors                            |                       |       |                   |                            |              |                  |             |                            |             |                 |
| Prognostic factors <sup>a</sup>          | Analysis <sup>b</sup> | Phase | Study limitations | Inconsistency <sup>c</sup> | Indirectness | Publication bias | Imprecision | Moderate/large effect size | Dose effect | Overall quality |
| APACHE II score                          | Uni                   | 1     | +                 | -                          | -            | +                | -           | -                          | -           | Very Low        |
|                                          | Multi                 | 1     | +                 | N/A                        | -            | +                | -           | -                          | -           | Very low        |
| PaO <sub>2</sub> /FiO <sub>2</sub> ratio | Uni                   | 1     | +                 | -                          | -            | +                | -           | +                          | -           | Low             |
|                                          | Multi                 | 1     | +                 | -                          | -            | +                | -           | -                          | -           | Very low        |
| LDH                                      | Uni                   | 1     | +                 | -                          | -            | +                | -           | -                          | -           | Very low        |
|                                          | Multi                 | 1     | +                 | -                          | -            | +                | -           | -                          | -           | Very low        |
| WBC                                      | Uni                   | 1     | +                 | -                          | -            | +                | -           | -                          | -           | Very low        |
|                                          | Multi                 | 1     | +                 | N/A                        | -            | +                | -           | -                          | -           | Very low        |
| Oxygen therapy<br>(before AE)            | Uni                   | 1     | +                 | -                          | -            | +                | -           | -                          | -           | Very low        |
|                                          | Multi                 | 1     | +                 | -                          | -            | +                | +           | +                          | -           | Very low        |

a, A total of 5 clinical information was determined as prognostic factors from 30 potential prognostic factors based on the consistent and significant result on both univariate and multivariate analyses.

b, 'uni' indicating univariate analysis while 'multi' indicating multivariate analysis.

c, N/A indicating not applicable due to only one study available.

1  
2  
3  
4  
5  
6  
7  
8  
9  
10  
11  
12  
13  
14  
15  
16  
17  
18  
19  
20  
21  
22  
23  
24  
25  
26  
27  
28  
29  
30  
31  
32  
33  
34  
35  
36  
37  
38  
39  
40  
41  
42  
43  
44  
45  
46

AE, acute exacerbation; APACHE, acute physiology and chronic health evaluation; BAL, bronchoalveolar lavage; HRCT, high resolution computed tomography; KL-6, Krebs von den Lungen-6; LDH, lactate dehydrogenase; PaO<sub>2</sub>/FiO<sub>2</sub> ratio, partial pressure of arterial oxygen/fraction of inspired oxygen ratio, WBC, white blood cell;

For peer review only

## Figure legends

### Figure 1. Forrest plot of the result of univariate analysis for APACHE II score

The result of univariate analysis in 3 studies was pooled for meta-analysis and a total of 194 patients were included. APACHE II score was significantly associated with all-cause mortality with a hazard ratio (HR) of 1.09 (95% confidence interval: 1.04 to 1.15,  $p=0.0009$ ). There was no heterogeneity ( $\chi^2=0.95$ ,  $p=0.62$ ,  $I^2=0\%$ ).

### Figure 2. Forrest plot of the result of univariate analysis for partial pressure of arterial oxygen/fraction of inspired oxygen (PaO<sub>2</sub>/FiO<sub>2</sub>) ratio (combined by hazard ratio)

The result of univariate analysis in 6 studies were pooled for meta-analysis and a total of 325 patients were included. PaO<sub>2</sub>/FiO<sub>2</sub> ratio was significantly associated with all-cause mortality with a hazard ratio (HR) of 0.95 (95% confidence interval: 0.92 to 0.97,  $p<0.0001$ ). There was no heterogeneity ( $\chi^2=4.66$ ,  $p=0.46$ ,  $I^2=0\%$ ).

### Figure 3. Forrest plot of the result of univariate analysis for partial pressure of arterial oxygen/fraction of inspired oxygen (PaO<sub>2</sub>/FiO<sub>2</sub>) ratio (combined by odds ratio)

The result of univariate analysis in 3 studies were pooled for meta-analysis and a total of 236 patients were included. PaO<sub>2</sub>/FiO<sub>2</sub> ratio was significantly associated with all-cause mortality with an odds ratio (OR) of 0.92 (95% confidence interval: 0.89 to 0.95,  $p<0.00001$ ). There was mild heterogeneity with no statistical significance ( $\chi^2=2.46$ ,  $p=0.29$ ,  $I^2=19\%$ ). The 95% prediction interval ranged from 0.75 to 1.13.

### Figure 4. Forrest plot of the result of univariate analysis for partial pressure of arterial oxygen/ fraction of inspired oxygen (PaO<sub>2</sub>/FiO<sub>2</sub>) ratio (combined by mean difference)

The result of univariate analysis in 4 studies was pooled for meta-analysis and a total of 118 patients were included. There was no significant difference of PaO<sub>2</sub>/FiO<sub>2</sub> ratio between non-survivors and survivors with a mean difference (MD) of -76.3 mmHg (95% confidence interval: -153.9 to 1.28,  $p=0.05$ ). There was substantial heterogeneity with statistical significance ( $\chi^2=32.91$ ,  $p<0.00001$ ,  $I^2=91\%$ ). The 95% prediction interval ranged from -435.2 to 282.6. All studies were conducted in Japan and implemented nearly the same definition of AE of IPF. The number of included patients were 50 or fewer in all studies. The effect of one study (Tsushima 2014 [67]) was extremely different from that of the other three studies. It analysed 28-day all-cause mortality whereas the other three studies analysed either in-hospital, 60-day or overall all-cause mortality.

1  
2  
3  
4  
5  
6 Figure 5. Forrest plot of the result of univariate analysis for lactate dehydrogenase  
7 (LDH) (combined by hazard ratio)  
8

9 The result of univariate analysis in 7 studies was pooled for meta-analysis and a total of  
10 425 patients were included. LDH was significantly associated with all-cause mortality  
11 with a hazard ratio (HR) of 1.02 (95% confidence interval: 1.01 to 1.02,  $p < 0.00001$ ).  
12 There was no heterogeneity ( $\chi^2 = 5.58$ ,  $p = 0.47$ ,  $I^2 = 0\%$ ).  
13  
14  
15

16 Figure 6. Forrest plot of the result of univariate analysis for lactate dehydrogenase  
17 (LDH) (combined by standardized mean difference)  
18

19 The result of univariate analysis in 4 studies was pooled for meta-analysis and a total of  
20 118 patients were included. LDH was significantly associated with all-cause mortality  
21 with a standardized mean difference (SMD) of 0.48 (95% confidence interval: 0.11 to  
22 0.84,  $p = 0.01$ ). There was no heterogeneity ( $\chi^2 = 0.66$ ,  $p = 0.88$ ,  $I^2 = 0\%$ ).  
23  
24  
25

26 Figure 7. Forrest plot of the result of univariate analysis for white blood cell (WBC)  
27 count  
28

29 The result of univariate analysis in 6 studies was pooled for meta-analysis and a total of  
30 242 patients were included. WBC count was significantly associated with all-cause  
31 mortality with a mean difference (MD) of 1.35 (95% confidence interval: 0.19 to 2.51,  
32  $p = 0.02$ ). There was mild heterogeneity with no statistical significance ( $\chi^2 = 6.41$ ,  
33  $p = 0.27$ ,  $I^2 = 22\%$ ). The 95% prediction interval ranged from -1.15 to 3.85.  
34  
35  
36  
37

38 Figure 8. Forrest plot of the result of univariate analysis for oxygen therapy before acute  
39 exacerbation  
40

41 The result of univariate analysis in 4 studies was pooled for meta-analysis and a total of  
42 160 patients were included. Oxygen therapy before acute exacerbation was significantly  
43 associated with all-cause mortality with a hazard ratio (HR) of 1.88 (95% confidence  
44 interval: 1.15 to 3.09,  $p = 0.01$ ). There was no heterogeneity ( $\chi^2 = 2.05$ ,  $p = 0.56$ ,  $I^2 = 0\%$ ).  
45  
46  
47  
48  
49  
50  
51  
52  
53  
54  
55  
56  
57  
58  
59  
60

1  
2  
3  
4  
5  
6 e-Figure legends

7  
8 e-Figure 1. Study flow diagram

9  
10 A total of 6763 reports were identified through Medline, EMBASE, Science Citation  
11 Index Expanded and Google Scholar. After excluding 1368 duplicates, 79 non-English  
12 records, 3293 reports of ineligible types (consisting of 1353 conference proceedings,  
13 1068 review articles, 294 editorials or letters and 578 case reports) and 1917 irrelevant  
14 articles, the remaining 106 reports were obtained as full-texts. Out of these, 69 reports  
15 were excluded due to no prognosis in 43 studies, interstitial pneumonia other than IPF  
16 in 12 studies, deterioration other than acute exacerbation in 3 studies, inclusion of stable  
17 IPF in 5 studies, multiple episodes of acute exacerbation in 1 study and no quantitative  
18 data in 5 studies. Finally, 37 articles/studies were eligible for this review.

19  
20  
21  
22  
23  
24 e-Figure 2. Forrest plot of the result of univariate analysis for age (combined by hazard  
25 ratio)

26  
27  
28 The result of univariate analysis in 8 studies was pooled for meta-analysis and a total of  
29 405 patients were included. Age was not significantly associated with all-cause  
30 mortality with a hazard ratio (HR) of 1.00 (95% confidence interval: 0.98 to 1.02,  
31  $p=0.92$ ). There was no heterogeneity ( $\chi^2=4.92$ ,  $p=0.67$ ,  $I^2=0\%$ ).

32  
33  
34  
35 e-Figure 3. Forrest plot of the result of univariate analysis for age (combined by odds  
36 ratio)

37  
38 The result of univariate analysis in 3 studies was pooled for meta-analysis and a total of  
39 236 patients were included. Age was not significantly associated with all-cause  
40 mortality with an odds ratio (OR) of 1.02 (95% confidence interval: 0.98 to 1.05,  
41  $p=0.35$ ). There was no heterogeneity ( $\chi^2=0.34$ ,  $p=0.84$ ,  $I^2=0\%$ ).

42  
43  
44  
45 e-Figure 4. Forrest plot of the result of univariate analysis for sex (male vs. female)  
46 (combined by hazard ratio)

47  
48 The result of univariate analysis in 7 studies was pooled for meta-analysis and a total of  
49 377 patients were included. Men were not significantly associated with all-cause  
50 mortality with a hazard ratio (HR) of 0.93 (95% confidence interval: 0.65 to 1.34,  
51  $p=0.71$ ). There was no heterogeneity ( $\chi^2=4.01$ ,  $p=0.68$ ,  $I^2=0\%$ ).

52  
53  
54  
55 e-Figure 5. Forrest plot of the result of univariate analysis for sex (male vs. female)  
56 (combined by odds ratio)

1  
2  
3  
4  
5  
6 The result of univariate analysis in 5 studies was pooled for meta-analysis and a total of  
7 306 patients were included. Men were not significantly associated with all-cause  
8 mortality with an odds ratio (OR) of 1.28 (95% confidence interval: 0.74 to 2.21,  
9  $p=0.38$ ). There was no heterogeneity ( $\chi^2=3.98$ ,  $p=0.41$ ,  $I^2=0\%$ ).

10  
11  
12 e-Figure 6. Forrest plot of the result of univariate analysis for smoking history (ever-  
13 smoker vs. never-smoker) (combined by hazard ratio)

14  
15  
16 The result of univariate analysis in 3 studies was pooled for meta-analysis and a total of  
17 145 patients were included. Smoking history was not significantly associated with all-  
18 cause mortality with a hazard ratio (HR) of 0.98 (95% confidence interval: 0.35 to 2.75,  
19  $p=0.97$ ). There was considerable heterogeneity with statistical significance ( $\chi^2=5.88$ ,  
20  $p=0.05$ ,  $I^2=66\%$ ). The 95% prediction interval ranged from 0.0000 to 95377. All studies  
21 were conducted in Japan and implemented nearly the same definition of AE of IPF. One  
22 study (Sokai 2017 [62]) demonstrated the effect estimate in the opposite direction from  
23 the other two studies. It included over 50 patients and analysed 180-day all-cause  
24 mortality whereas the other two studies included over 50 or fewer than 50 patients and  
25 analysed in-hospital or overall all-cause mortality.

26  
27  
28 e-Figure 7. Forrest plot of the result of univariate analysis for smoking history (ever-  
29 smoker vs. never-smoker) (combined by odds ratio)

30  
31  
32 The result of univariate analysis in 4 studies was pooled for meta-analysis and a total of  
33 243 patients were included. Smoking history was not significantly associated with all-  
34 cause mortality with an odds ratio (OR) of 0.99 (95% confidence interval: 0.59 to 1.67,  
35  $p=0.98$ ). There was no heterogeneity ( $\chi^2=0.49$ ,  $p=0.92$ ,  $I^2=0\%$ ).

36  
37  
38 e-Figure 8. Forrest plot of the result of univariate analysis for smoking history (pack-  
39 year)

40  
41  
42 The result of univariate analysis in 3 studies was pooled for meta-analysis and a total of  
43 116 patients were included. Smoking history was not significantly associated with all-  
44 cause mortality with a hazard ratio (HR) of 1.00 (95% confidence interval: 0.89 to 1.11,  
45  $p=0.93$ ). There was mild heterogeneity with no statistical significance ( $\chi^2=2.48$ ,  
46  $p=0.29$ ,  $I^2=19\%$ ). The 95% prediction interval ranged from 0.51 to 1.97.

47  
48  
49 e-Figure 9. Forrest plot of the result of univariate analysis for fever

50  
51  
52 The result of univariate analysis in 3 studies was pooled for meta-analysis and a total of  
53 206 patients were included. Fever was not significantly associated with all-cause

1  
2  
3  
4  
5  
6 mortality with an odds ratio (OR) of 1.66 (95% confidence interval: 0.74 to 3.70,  
7  $p=0.22$ ). There was considerable heterogeneity with statistical significance ( $\chi^2=5.32$ ,  
8  $p=0.07$ ,  $I^2=62\%$ ). The 95% prediction interval ranged from 0.0003 to 10770. All studies  
9 implemented the same definition of AE of IPF. One study (Anzai 2013 [37]), which was  
10 conducted in Japan, demonstrated the effect estimate in the opposite direction from the  
11 other two studies. It included 50 patients and analysed overall all-cause mortality. The  
12 other two studies, which were conducted in Korea, included over 50 patients and  
13 analysed in-hospital all-cause mortality.  
14  
15  
16  
17

18 e-Figure 10. Forrest plot of the result of univariate analysis for percentage of predicted  
19 value of forced vital capacity (%FVC) (combined by hazard ratio)  
20  
21

22 The result of univariate analysis in 5 studies was pooled for meta-analysis and a total of  
23 199 patients were included. %FVC was not significantly associated with all-cause  
24 mortality with a hazard ratio (HR) of 0.99 (95% confidence interval: 0.98 to 1.01,  
25  $p=0.29$ ). There was no heterogeneity ( $\chi^2=2.69$ ,  $p=0.61$ ,  $I^2=0\%$ ).  
26  
27

28 e-Figure 11. Forrest plot of the result of univariate analysis for percentage of predicted  
29 value of forced vital capacity (%FVC) (combined by odds ratio)  
30  
31

32 The result of univariate analysis in 3 studies was pooled for meta-analysis and a total of  
33 193 patients were included. %FVC was not significantly associated with all-cause  
34 mortality with an odds ratio (OR) of 1.01 (95% confidence interval: 0.99 to 1.02,  
35  $p=0.49$ ). There was no heterogeneity ( $\chi^2=0.83$ ,  $p=0.66$ ,  $I^2=0\%$ ).  
36  
37

38 e-Figure 12. Forrest plot of the result of univariate analysis for percentage of predictive  
39 value of diffusion capacity of the lung for carbon monoxide (%DLCO)  
40  
41

42 The result of univariate analysis in 4 studies was pooled for meta-analysis and a total of  
43 171 patients were included. %DLCO was not significantly associated with all-cause  
44 mortality with a hazard ratio (HR) of 0.99 (95% confidence interval: 0.98 to 1.01,  
45  $p=0.42$ ). There was no heterogeneity ( $\chi^2=1.62$ ,  $p=0.66$ ,  $I^2=0\%$ ).  
46  
47

48 e-Figure 13. Forrest plot of the result of univariate analysis for extent of abnormality on  
49 high resolution computed tomography (HRCT) scan  
50  
51

52 The result of univariate analysis in 3 studies was pooled for meta-analysis and a total of  
53 120 patients were included. Extent of abnormality on HRCT scan was not significantly  
54 associated with all-cause mortality with a hazard ratio (HR) of 1.02 (95% confidence  
55 interval: 1.00 to 1.05,  $p=0.08$ ). There was moderate heterogeneity with no statistical  
56  
57  
58  
59  
60



1  
2  
3  
4  
5  
6  
7  
8  
9  
10  
11  
12  
13  
14  
15  
16  
17  
18  
19  
20  
21  
22  
23  
24  
25  
26  
27  
28  
29  
30  
31  
32  
33  
34  
35  
36  
37  
38  
39  
40  
41  
42  
43  
44  
45  
46  
47  
48  
49  
50  
51  
52  
53  
54  
55  
56  
57  
58  
59  
60

significance ( $\chi^2=2.88$ ,  $p=0.24$ ,  $I^2=30\%$ ). The 95% prediction interval ranged from 0.85 to 1.23.

e-Figure 14. Forrest plot of the result of univariate analysis for C-reactive protein (CRP) (combined by hazard ratio)

The result of univariate analysis in 4 studies was pooled for meta-analysis and a total of 243 patients were included. CRP was significantly associated with all-cause mortality with a hazard ratio (HR) of 1.05 (95% confidence interval: 1.02 to 1.08,  $p=0.003$ ). There was no heterogeneity ( $\chi^2=1.14$ ,  $p=0.77$ ,  $I^2=0\%$ ).

e-Figure 15. Forrest plot of the result of univariate analysis for C-reactive protein (CRP) (combined by standardized mean difference)

The result of univariate analysis in 6 studies was pooled for meta-analysis and a total of 242 patients were included. CRP was significantly associated with all-cause mortality with a standardized mean difference (SMD) of 0.69 (95% confidence interval: 0.19 to 1.18,  $p=0.007$ ). There was substantial heterogeneity ( $\chi^2=16.44$ ,  $p=0.006$ ,  $I^2=70\%$ ). The 95% prediction interval ranged from -0.86 to 2.24. All studies except for one study (Kang 2018 [47]) were conducted in Japan and most of these studies included 50 or fewer patients. All studies implemented nearly the same definition of AE of IPF. The effect of one study (Tsushima 2014 [67]) was extremely different from that of the other five studies. It analysed 28-day all-cause mortality whereas the other five studies analysed either in-hospital, 60-day, 3-month or overall all-cause mortality. Meta-analysis excluding this study demonstrated a SMD of 0.45 (95%CI: 0.19-0.72) with no heterogeneity ( $\chi^2=2.00$ ,  $p=0.74$ ,  $I^2=0\%$ ).

e-Figure 16. Forrest plot of the result of univariate analysis for Krebs von den Lungen-6 (KL-6) (combined by hazard ratio)

The result of univariate analysis in 4 studies was pooled for meta-analysis and a total of 265 patients were included. KL-6 was significantly associated with all-cause mortality with a hazard ratio (HR) of 1.02 (95% confidence interval: 1.01 to 1.04,  $p=0.008$ ). There was no heterogeneity ( $\chi^2=1.01$ ,  $p=0.80$ ,  $I^2=0\%$ ).

e-Figure 17. Forrest plot of the result of univariate analysis for Krebs von den Lungen-6 (KL-6) (combined by mean difference)

The result of univariate analysis in 4 studies was pooled for meta-analysis and a total of 118 patients were included. KL-6 was not significantly associated with all-cause

1  
2  
3  
4  
5  
6 mortality with a mean difference (MD) of -23.6 (95% confidence interval: -119.7 to  
7 72.5,  $p=0.63$ ). There was substantial heterogeneity with statistical significance  
8 ( $\chi^2=18.13$ ,  $p=0.0004$ ,  $I^2=83\%$ ). The 95% prediction interval ranged from -458.7 to  
9 411.5. All studies were conducted in Japan and included 50 or fewer patients. All  
10 studies implemented nearly the same definition of AE of IPF. The effect of one study  
11 (Tsushima 2014 [67]) was extremely different from that of the other three studies. It  
12 analysed 28-day all-cause mortality whereas the other three studies analysed either in-  
13 hospital, 60-day or overall all-cause mortality. Meta-analysis excluding this study  
14 demonstrated an MD of 31.3 (95%CI: -11.1 to 73.7) with no heterogeneity ( $\chi^2=1.30$ ,  
15  $p=0.52$ ,  $I^2=0\%$ ).  
16  
17  
18  
19  
20

21 e-Figure 18. Forrest plot of the result of univariate analysis for surfactant protein-D (SP-  
22 D) (combined by hazard ratio)  
23  
24

25 The result of univariate analysis in 4 studies was pooled for meta-analysis and a total of  
26 243 patients were included. SP-D was not significantly associated with all-cause  
27 mortality with a hazard ratio (HR) of 0.99 (95% confidence interval: 0.99 to 1.00,  
28  $p=0.15$ ). There was no heterogeneity ( $\chi^2=0.20$ ,  $p=0.98$ ,  $I^2=0\%$ ).  
29  
30

31 e-Figure 19. Forrest plot of the result of univariate analysis for pirfenidone therapy  
32 before acute exacerbation  
33  
34

35 The result of univariate analysis in 3 studies was pooled for meta-analysis and a total of  
36 164 patients were included. Pirfenidone therapy before acute exacerbation was not  
37 significantly associated with all-cause mortality with a hazard ratio (HR) of 1.34 (95%  
38 confidence interval: 0.81 to 2.24,  $p=0.26$ ). There was mild heterogeneity with no  
39 statistical significance ( $\chi^2=2.27$ ,  $p=0.32$ ,  $I^2=12\%$ ). The 95% prediction interval ranged  
40 from 0.02 to 75.6.  
41  
42  
43  
44

45 e-Figure 20. Forrest plot of the result of univariate analysis for corticosteroid therapy  
46 before acute exacerbation  
47  
48

49 The result of univariate analysis in 3 studies was pooled for meta-analysis and a total of  
50 161 patients were included. Corticosteroid therapy before acute exacerbation was not  
51 significantly associated with all-cause mortality with a hazard ratio (HR) of 0.96 (95%  
52 confidence interval: 0.61 to 1.52,  $p=0.87$ ). There was no heterogeneity ( $\chi^2=1.65$ ,  
53  $p=0.44$ ,  $I^2=0\%$ ).  
54  
55  
56  
57  
58  
59  
60

1  
2  
3  
4  
5  
6 e-Figure 21. Forrest plot of the result of univariate analysis for partial pressure of  
7 arterial oxygen to fraction of inspired oxygen (PaO<sub>2</sub>/FiO<sub>2</sub>) ratio (combined by mean  
8 difference)  
9

10  
11 As there was substantial heterogeneity in the result of meta-analysis using MD for  
12 PaO<sub>2</sub>/FiO<sub>2</sub> ratio (Figure 4), meta-analysis was re-conducted after excluding one study  
13 (Tsushima 2014 [67]) that demonstrated an extremely different effect estimate from the  
14 other studies. The result was significant with an MD of -117.7 (95%CI: -148.0--87.5)  
15 and no heterogeneity was identified (chi<sup>2</sup>=1.69, p=0.43, I<sup>2</sup>=0%).  
16  
17  
18  
19  
20  
21  
22  
23  
24  
25  
26  
27  
28  
29  
30  
31  
32  
33  
34  
35  
36  
37  
38  
39  
40  
41  
42  
43  
44  
45  
46  
47  
48  
49  
50  
51  
52  
53  
54  
55  
56  
57  
58  
59  
60

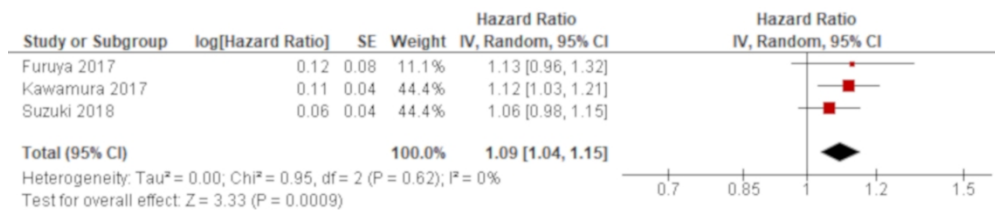

Figure 1

226x50mm (600 x 600 DPI)

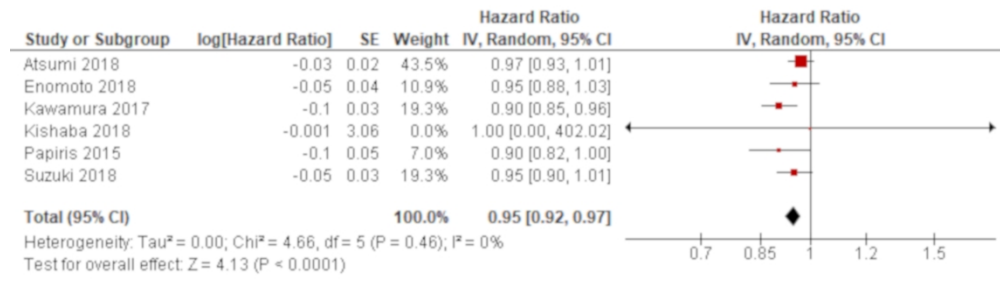

Figure 2

173x50mm (600 x 600 DPI)

1  
2  
3  
4  
5  
6  
7  
8  
9  
10  
11  
12  
13  
14  
15  
16  
17  
18  
19  
20  
21  
22  
23  
24  
25  
26  
27  
28  
29  
30  
31  
32  
33  
34  
35  
36  
37  
38  
39  
40  
41  
42  
43  
44  
45  
46  
47  
48  
49  
50  
51  
52  
53  
54  
55  
56  
57  
58  
59  
60

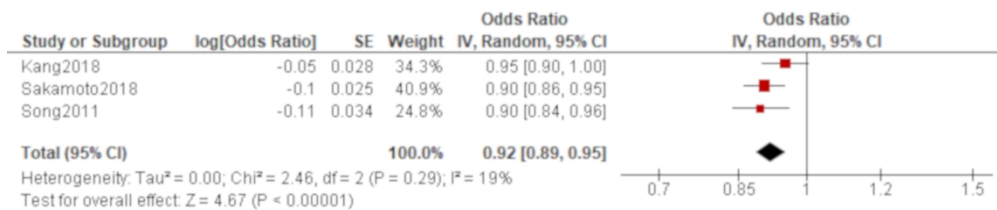

Figure 3

225x50mm (600 x 600 DPI)

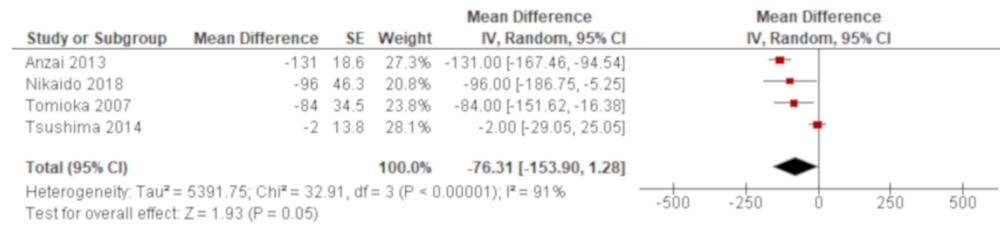

Figure 4

213x50mm (600 x 600 DPI)

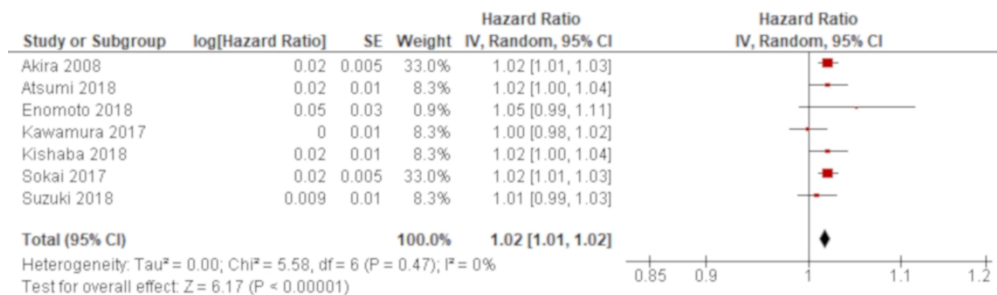

Figure 5

163x50mm (600 x 600 DPI)



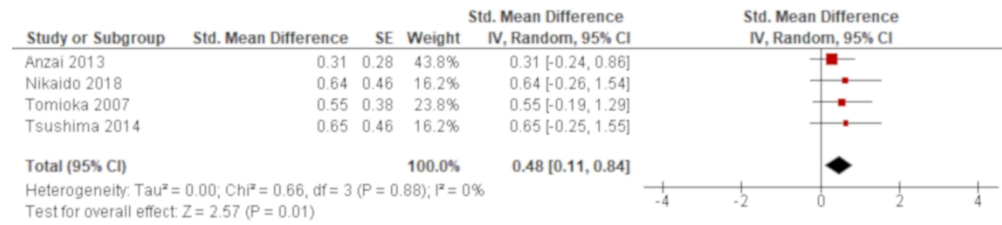

Figure 6

215x50mm (600 x 600 DPI)

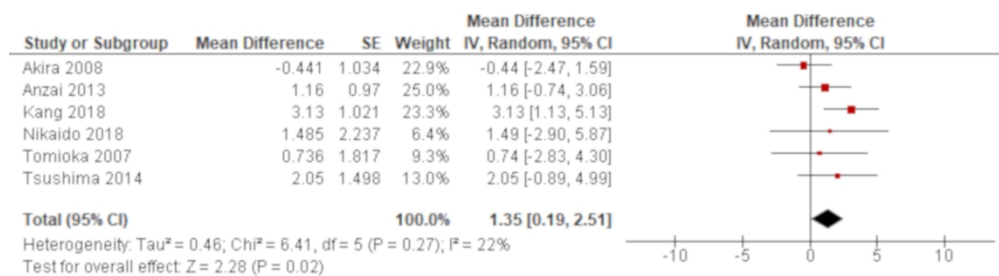

Figure 7

174x50mm (600 x 600 DPI)

1  
2  
3  
4  
5  
6  
7  
8  
9  
10  
11  
12  
13  
14  
15  
16  
17  
18  
19  
20  
21  
22  
23  
24  
25  
26  
27  
28  
29  
30  
31  
32  
33  
34  
35  
36  
37  
38  
39  
40  
41  
42  
43  
44  
45  
46  
47  
48  
49  
50  
51  
52  
53  
54  
55  
56  
57  
58  
59  
60

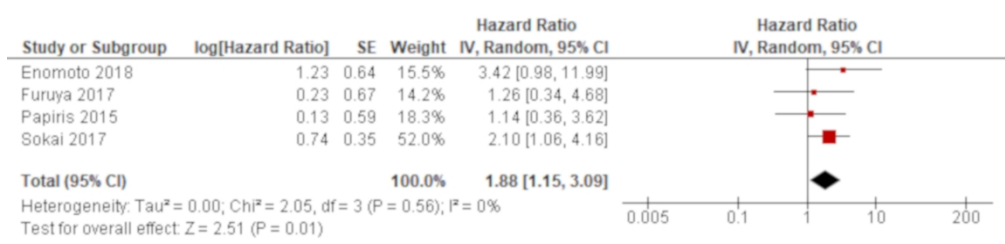

Figure 8

207x50mm (600 x 600 DPI)

1  
2  
3  
4  
5  
6  
7  
8  
9  
10  
11  
12  
13  
14  
15  
16  
17  
18  
19  
20  
21  
22  
23  
24  
25  
26  
27  
28  
29  
30  
31  
32  
33  
34  
35  
36  
37  
38  
39  
40  
41  
42  
43  
44  
45  
46  
47  
48  
49  
50  
51  
52  
53  
54  
55  
56  
57  
58  
59  
60

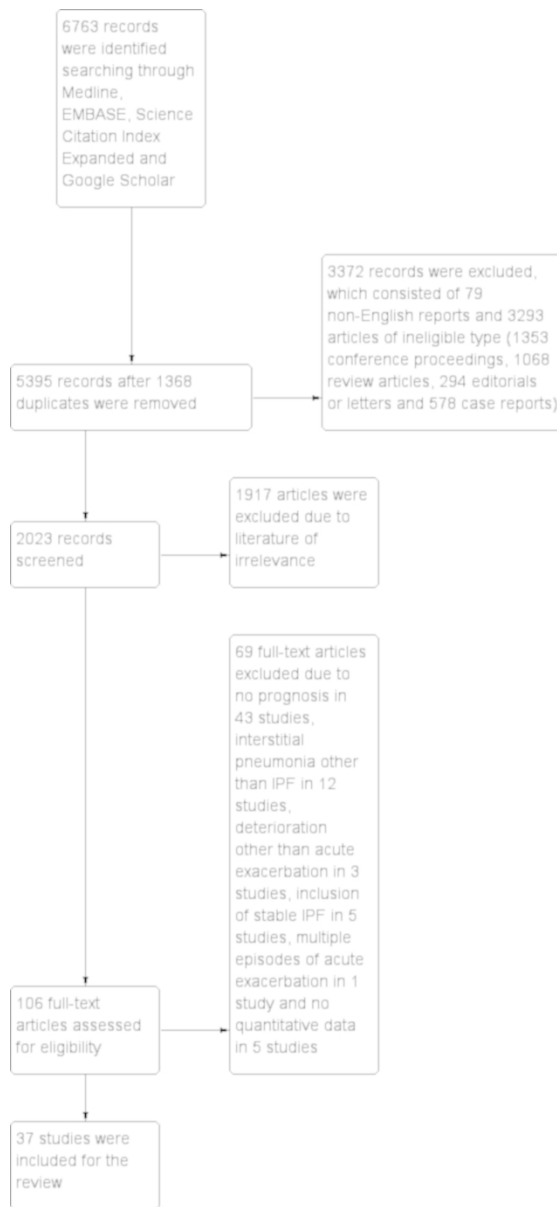

e-Figure 1

80x173mm (600 x 600 DPI)

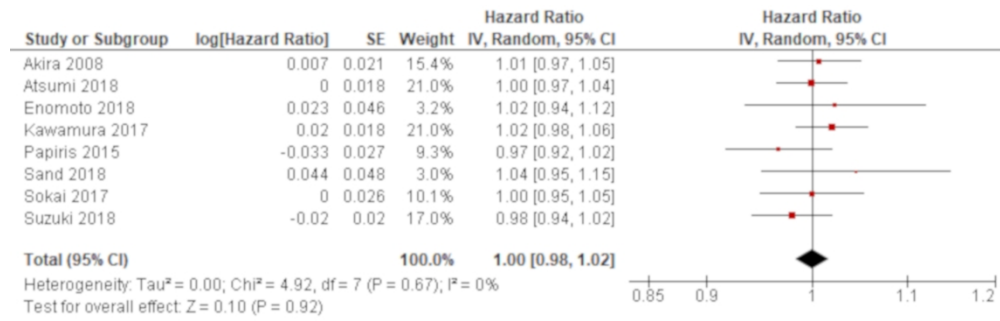

e-Figure 2

152x50mm (600 x 600 DPI)

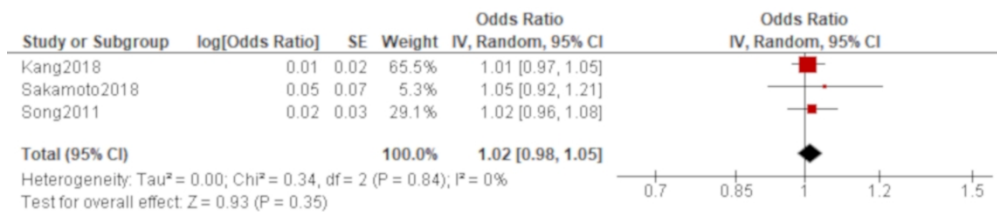

e-Figure 3

225x50mm (600 x 600 DPI)

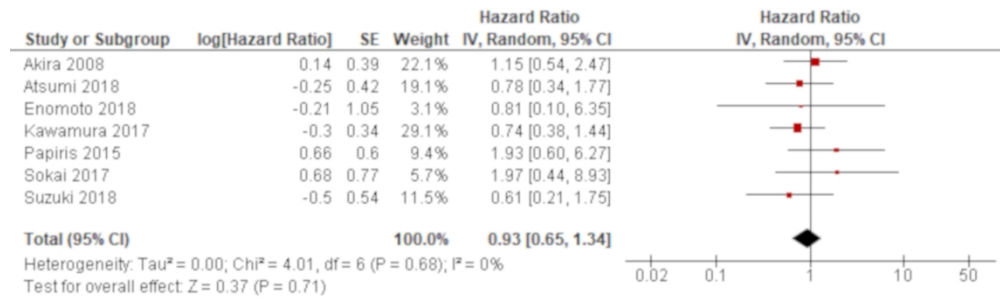

e-Figure 4

161x50mm (600 x 600 DPI)

1  
2  
3  
4  
5  
6  
7  
8  
9  
10  
11  
12  
13  
14  
15  
16  
17  
18  
19  
20  
21  
22  
23  
24  
25  
26  
27  
28  
29  
30  
31  
32  
33  
34  
35  
36  
37  
38  
39  
40  
41  
42  
43  
44  
45  
46  
47  
48  
49  
50  
51  
52  
53  
54  
55  
56  
57  
58  
59  
60

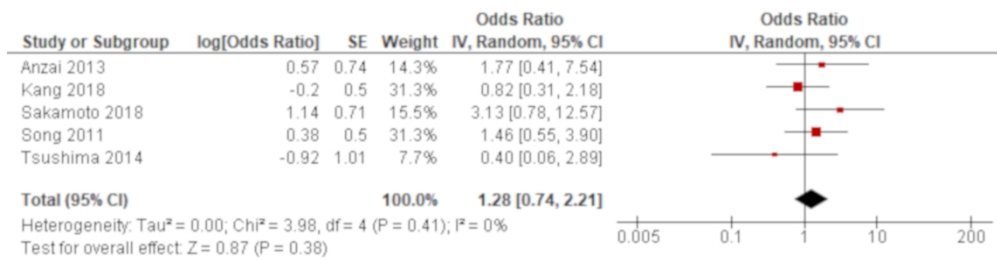

e-Figure 5

186x50mm (600 x 600 DPI)



1  
2  
3  
4  
5  
6  
7  
8  
9  
10  
11  
12  
13  
14  
15  
16  
17  
18  
19  
20  
21  
22  
23  
24  
25  
26  
27  
28  
29  
30  
31  
32  
33  
34  
35  
36  
37  
38  
39  
40  
41  
42  
43  
44  
45  
46  
47  
48  
49  
50  
51  
52  
53  
54  
55  
56  
57  
58  
59  
60

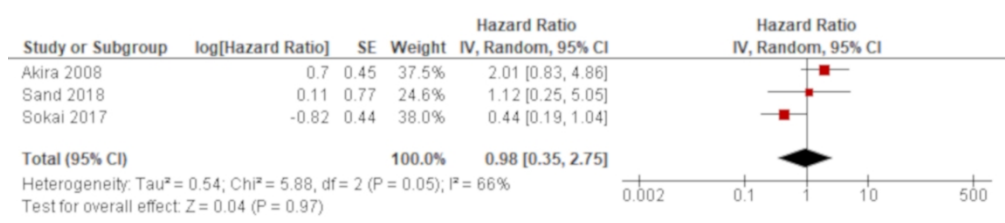

e-Figure 6

227x50mm (600 x 600 DPI)

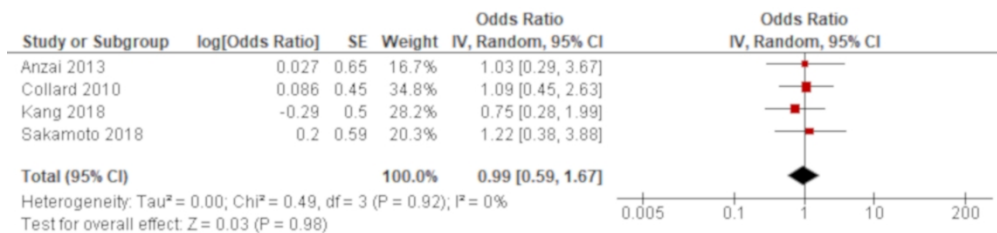

e-Figure 7

203x50mm (600 x 600 DPI)

1  
2  
3  
4  
5  
6  
7  
8  
9  
10  
11  
12  
13  
14  
15  
16  
17  
18  
19  
20  
21  
22  
23  
24  
25  
26  
27  
28  
29  
30  
31  
32  
33  
34  
35  
36  
37  
38  
39  
40  
41  
42  
43  
44  
45  
46  
47  
48  
49  
50  
51  
52  
53  
54  
55  
56  
57  
58  
59  
60

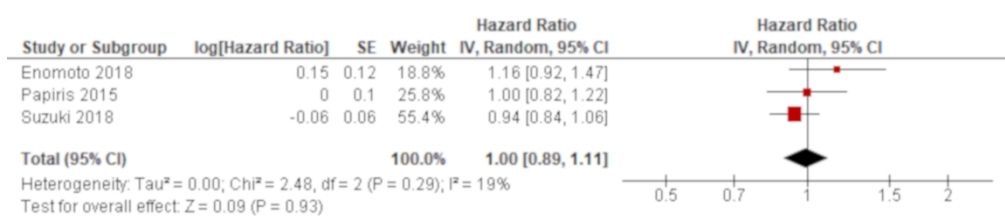

e-Figure 8

226x50mm (600 x 600 DPI)

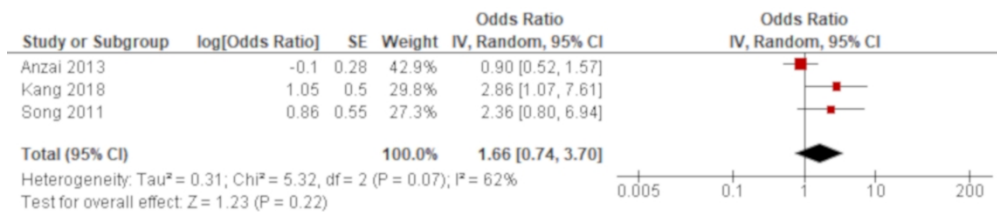

e-Figure 9

225x50mm (600 x 600 DPI)

1  
2  
3  
4  
5  
6  
7  
8  
9  
10  
11  
12  
13  
14  
15  
16  
17  
18  
19  
20  
21  
22  
23  
24  
25  
26  
27  
28  
29  
30  
31  
32  
33  
34  
35  
36  
37  
38  
39  
40  
41  
42  
43  
44  
45  
46  
47  
48  
49  
50  
51  
52  
53  
54  
55  
56  
57  
58  
59  
60

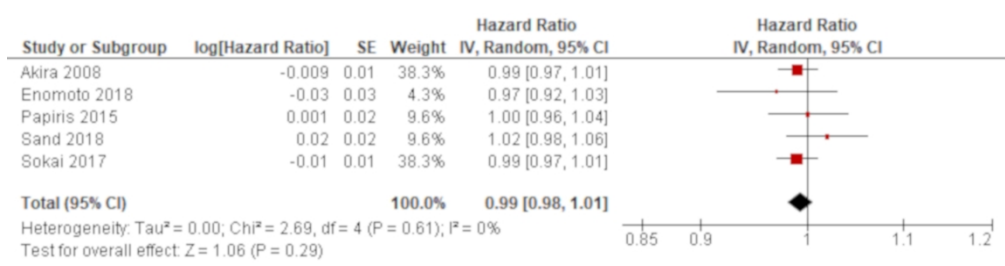

e-Figure 10

187x49mm (600 x 600 DPI)

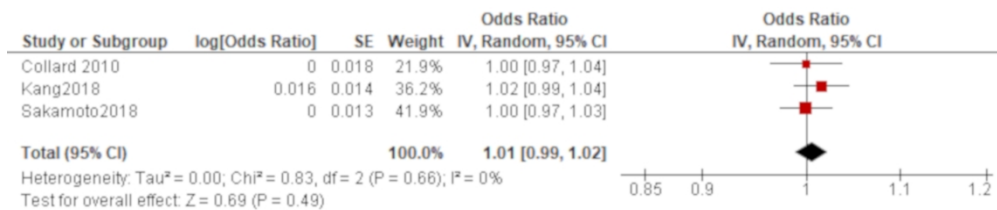

e-Figure 11

225x50mm (600 x 600 DPI)

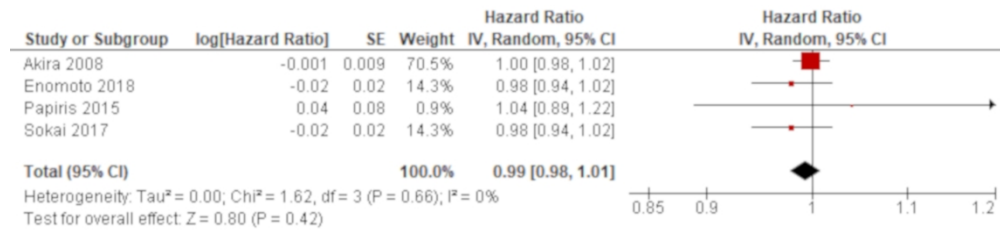

e-Figure 12

208x50mm (600 x 600 DPI)

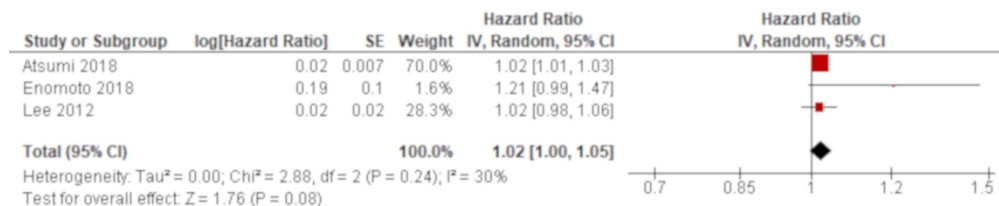

e-Figure 13

230x50mm (600 x 600 DPI)



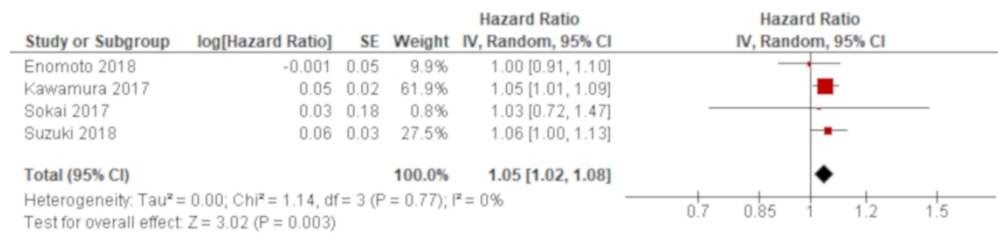

e-Figure 14

205x50mm (600 x 600 DPI)

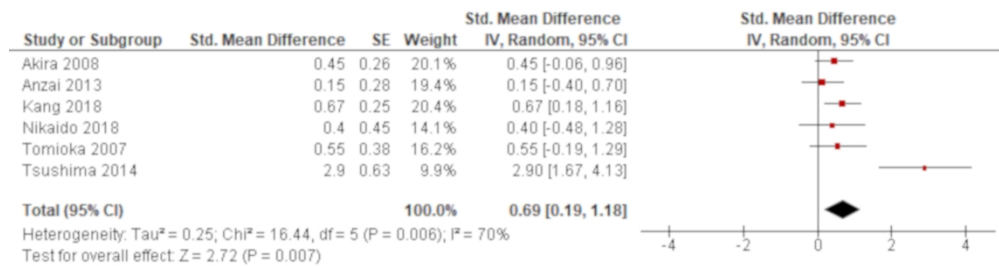

e-Figure 15

181x50mm (600 x 600 DPI)

1  
2  
3  
4  
5  
6  
7  
8  
9  
10  
11  
12  
13  
14  
15  
16  
17  
18  
19  
20  
21  
22  
23  
24  
25  
26  
27  
28  
29  
30  
31  
32  
33  
34  
35  
36  
37  
38  
39  
40  
41  
42  
43  
44  
45  
46  
47  
48  
49  
50  
51  
52  
53  
54  
55  
56  
57  
58  
59  
60

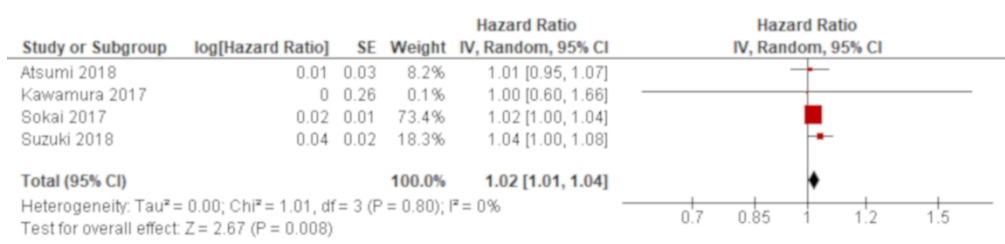

e-Figure 16

205x50mm (600 x 600 DPI)

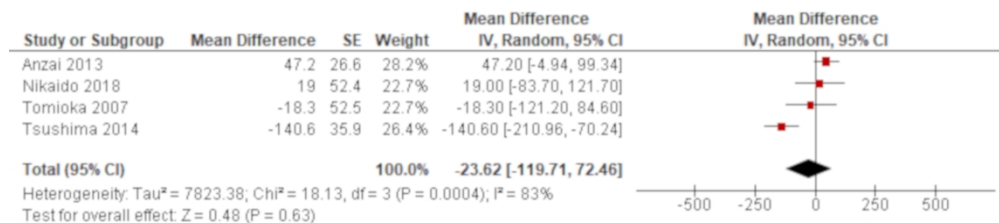

e-Figure 17

211x49mm (600 x 600 DPI)

1  
2  
3  
4  
5  
6  
7  
8  
9  
10  
11  
12  
13  
14  
15  
16  
17  
18  
19  
20  
21  
22  
23  
24  
25  
26  
27  
28  
29  
30  
31  
32  
33  
34  
35  
36  
37  
38  
39  
40  
41  
42  
43  
44  
45  
46  
47  
48  
49  
50  
51  
52  
53  
54  
55  
56  
57  
58  
59  
60

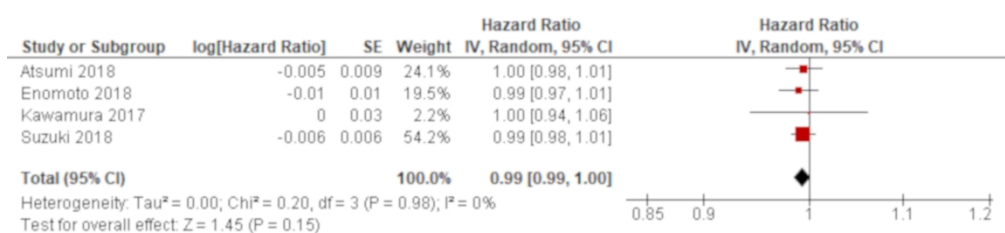

e-Figure 18

206x49mm (600 x 600 DPI)

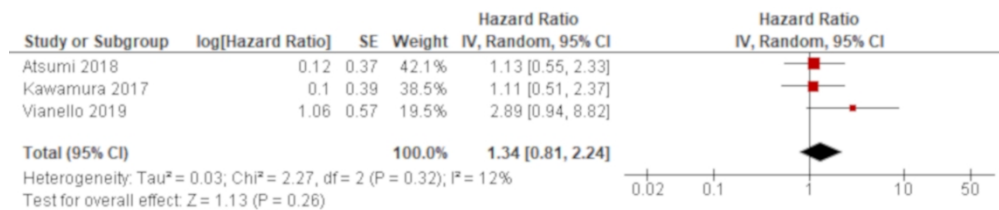

e-Figure 19

226x50mm (600 x 600 DPI)

1  
2  
3  
4  
5  
6  
7  
8  
9  
10  
11  
12  
13  
14  
15  
16  
17  
18  
19  
20  
21  
22  
23  
24  
25  
26  
27  
28  
29  
30  
31  
32  
33  
34  
35  
36  
37  
38  
39  
40  
41  
42  
43  
44  
45  
46  
47  
48  
49  
50  
51  
52  
53  
54  
55  
56  
57  
58  
59  
60

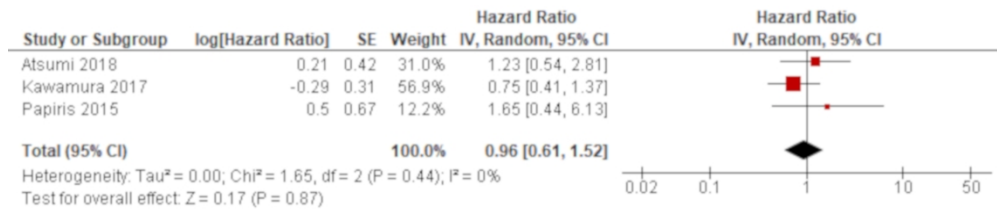

e-Figure 20

228x50mm (600 x 600 DPI)

1  
2  
3  
4  
5  
6  
7  
8  
9  
10  
11  
12  
13  
14  
15  
16  
17  
18  
19  
20  
21  
22  
23  
24  
25  
26  
27  
28  
29  
30  
31  
32  
33  
34  
35  
36  
37  
38  
39  
40  
41  
42  
43  
44  
45  
46  
47  
48  
49  
50  
51  
52  
53  
54  
55  
56  
57  
58  
59  
60

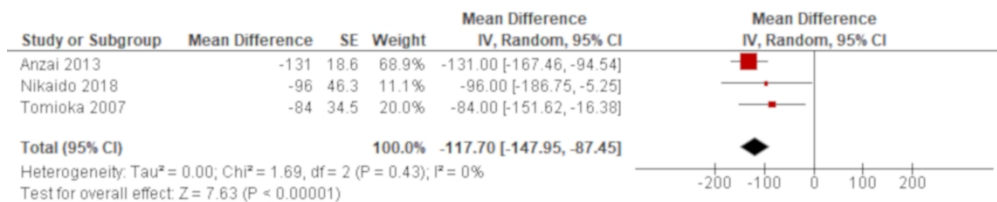

e-Figure 21

235x50mm (600 x 600 DPI)



## e-Appendix: Search terms for each electronic database

## Medline (Ovid)

- 1 exp Pulmonary Fibrosis/
- 2 exp Idiopathic Pulmonary Fibrosis/
- 3 exp Lung Diseases, Interstitial/
- 4 (pulmonary adj3 fibros\$).mp.
- 5 (interstitial adj3 pneumoni\$).mp.
- 6 exp Disease Progression /
- 7 (acute adj3 exacerbation?).mp.
- 8 (disease adj3 progression?).mp.
- 9 (disease adj3 exacerbation?).mp.
- 10 (deterioration?).mp.
- 11 incidence.sh.
- 12 exp Mortality/
- 13 follow-up studies.sh.
- 14 prognos\$.tw.
- 15 predict\$.tw.
- 16 course\$.tw.
- 17 (1 or 2 or 3 or 4 or 5)
- 18 (6 or 7 or 8 or 9 or 10)
- 19 (11 or 12 or 13 or 14 or 15 or 16)
- 20 (17 and 18 and 19)
- 21 limit 20 to yr="2002 -Current"

## EMBASE (Ovid)

- 1 exp fibrosing alveolitis/
- 2 exp interstitial pneumonia/
- 3 exp lung fibrosis /
- 4 (pulmonary adj3 fibros\$).mp.
- 5 (interstitial adj3 pneumoni\$).mp.
- 6 exp disease exacerbation /
- 7 exp deterioration /
- 8 (acute adj3 exacerbation?).mp.
- 9 (disease adj3 progression?).mp.
- 10 (disease adj3 exacerbation?).mp.
- 11 risk\$.mp.
- 12 diagnos\$.mp.
- 13 follow-up.mp.
- 14 ep.fs.
- 15 outcome.tw.
- 16 exp disease course/
- 17 (1 or 2 or 3 or 4 or 5)
- 18 (6 or 7 or 8 or 9 or 10)
- 19 (11 or 12 or 13 or 14 or 15 or 16)
- 20 (17 and 18 and 19)
- 21 limit 20 to yr="2002 -Current"

1  
2  
3  
4  
5  
6 Science Citation Index Expanded (Web of Science)  
7

8 #1 TS=("interstitial NEAR/3 lung NEAR/3 disease\$") OR TS=("interstitial NEAR/3  
9 pneumonia\$") OR TS=(alveolitis) OR TS=("pulmonary NEAR/3 fibros\*")  
10  
11

12 #2 TS=(acute NEAR/3 exacerbation\$) OR TS=(disease NEAR/3 progression\$) OR  
13 TS=(disease NEAR/3 exacerbation\$) OR TS=(deterioration\$)  
14

15 #3 TS=(prognos\*) OR TS=(mortality) OR TS=(outcome) OR TS=(course\$) OR  
16 TS=(follow-up) OR TS=(predict\*) OR TS=(incidence) OR TS=(risk)  
17  
18

19 #4 #1 AND #2 AND #3  
20

21 #5 #4 AND (2002-2019)  
22  
23  
24  
25  
26  
27  
28  
29  
30  
31  
32  
33  
34  
35  
36  
37  
38  
39  
40  
41  
42  
43  
44  
45  
46  
47  
48  
49  
50  
51  
52  
53  
54  
55  
56  
57  
58  
59  
60

1  
2  
3  
4  
5  
6 Google scholar  
7

8 (“acute exacerbation” OR "disease progression" OR "disease exacerbation")  
9 (“interstitial lung disease” OR “usual interstitial pneumonia” OR “idiopathic pulmonary  
10 fibrosis”) (prognosis OR mortality OR outcome)  
11  
12  
13  
14  
15  
16  
17  
18  
19  
20  
21  
22  
23  
24  
25  
26  
27  
28  
29  
30  
31  
32  
33  
34  
35  
36  
37  
38  
39  
40  
41  
42  
43  
44  
45  
46  
47  
48  
49  
50  
51  
52  
53  
54  
55  
56  
57  
58  
59  
60

For peer review only

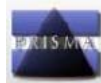

# PRISMA 2009 Checklist

1  
2  
3  
4  
5  
6  
7  
8  
9  
10  
11  
12  
13  
14  
15  
16  
17  
18  
19  
20  
21  
22  
23  
24  
25  
26  
27  
28  
29  
30  
31  
32  
33  
34  
35  
36  
37  
38  
39  
40  
41  
42  
43  
44  
45  
46  
47

| Section/topic                      | #  | Checklist item                                                                                                                                                                                                                                                                                              | Reported on page #   |
|------------------------------------|----|-------------------------------------------------------------------------------------------------------------------------------------------------------------------------------------------------------------------------------------------------------------------------------------------------------------|----------------------|
| <b>TITLE</b>                       |    |                                                                                                                                                                                                                                                                                                             |                      |
| Title                              | 1  | Identify the report as a systematic review, meta-analysis, or both.                                                                                                                                                                                                                                         | Page 1               |
| <b>ABSTRACT</b>                    |    |                                                                                                                                                                                                                                                                                                             |                      |
| Structured summary                 | 2  | Provide a structured summary including, as applicable: background; objectives; data sources; study eligibility criteria, participants, and interventions; study appraisal and synthesis methods; results; limitations; conclusions and implications of key findings; systematic review registration number. | Page 2-3             |
| <b>INTRODUCTION</b>                |    |                                                                                                                                                                                                                                                                                                             |                      |
| Rationale                          | 3  | Describe the rationale for the review in the context of what is already known.                                                                                                                                                                                                                              | Page 4               |
| Objectives                         | 4  | Provide an explicit statement of questions being addressed with reference to participants, interventions, comparisons, outcomes, and study design (PICOS).                                                                                                                                                  | Page 4-5             |
| <b>METHODS</b>                     |    |                                                                                                                                                                                                                                                                                                             |                      |
| Protocol and registration          | 5  | Indicate if a review protocol exists, if and where it can be accessed (e.g., Web address), and, if available, provide registration information including registration number.                                                                                                                               | Page 5               |
| Eligibility criteria               | 6  | Specify study characteristics (e.g., PICOS, length of follow-up) and report characteristics (e.g., years considered, language, publication status) used as criteria for eligibility, giving rationale.                                                                                                      | Page 5               |
| Information sources                | 7  | Describe all information sources (e.g., databases with dates of coverage, contact with study authors to identify additional studies) in the search and date last searched.                                                                                                                                  | Page 6               |
| Search                             | 8  | Present full electronic search strategy for at least one database, including any limits used, such that it could be repeated.                                                                                                                                                                               | Page 6<br>e-Appendix |
| Study selection                    | 9  | State the process for selecting studies (i.e., screening, eligibility, included in systematic review, and, if applicable, included in the meta-analysis).                                                                                                                                                   | Page 6               |
| Data collection process            | 10 | Describe method of data extraction from reports (e.g., piloted forms, independently, in duplicate) and any processes for obtaining and confirming data from investigators.                                                                                                                                  | Page 6               |
| Data items                         | 11 | List and define all variables for which data were sought (e.g., PICOS, funding sources) and any assumptions and simplifications made.                                                                                                                                                                       | Page 6               |
| Risk of bias in individual studies | 12 | Describe methods used for assessing risk of bias of individual studies (including specification of whether this was done at the study or outcome level), and how this information is to be used in any data synthesis.                                                                                      | Page 6               |
| Summary measures                   | 13 | State the principal summary measures (e.g., risk ratio, difference in means).                                                                                                                                                                                                                               | Page 6-7             |
| Synthesis of results               | 14 | Describe the methods of handling data and combining results of studies, if done, including measures of consistency (e.g., I <sup>2</sup> ) for each meta-analysis: <a href="http://bmjopen.bmj.com/site/about/guidelines.xhtml">http://bmjopen.bmj.com/site/about/guidelines.xhtml</a>                      | Page 7               |

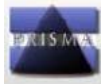

# PRISMA 2009 Checklist

Page 1 of 2

| Section/topic                 | #  | Checklist item                                                                                                                                                                                           | Reported on page #        |
|-------------------------------|----|----------------------------------------------------------------------------------------------------------------------------------------------------------------------------------------------------------|---------------------------|
| Risk of bias across studies   | 15 | Specify any assessment of risk of bias that may affect the cumulative evidence (e.g., publication bias, selective reporting within studies).                                                             | Page 7                    |
| Additional analyses           | 16 | Describe methods of additional analyses (e.g., sensitivity or subgroup analyses, meta-regression), if done, indicating which were pre-specified.                                                         | Page 7                    |
| <b>RESULTS</b>                |    |                                                                                                                                                                                                          |                           |
| Study selection               | 17 | Give numbers of studies screened, assessed for eligibility, and included in the review, with reasons for exclusions at each stage, ideally with a flow diagram.                                          | Page 8<br>e-Figure 1      |
| Study characteristics         | 18 | For each study, present characteristics for which data were extracted (e.g., study size, PICOS, follow-up period) and provide the citations.                                                             | Page 8-9<br>e-Table 1     |
| Risk of bias within studies   | 19 | Present data on risk of bias of each study and, if available, any outcome level assessment (see item 12).                                                                                                | Page 9<br>e-Table 3       |
| Results of individual studies | 20 | For all outcomes considered (benefits or harms), present, for each study: (a) simple summary data for each intervention group (b) effect estimates and confidence intervals, ideally with a forest plot. | Page 10-11<br>e-Table 4,5 |
| Synthesis of results          | 21 | Present results of each meta-analysis done, including confidence intervals and measures of consistency.                                                                                                  | Page 10-11<br>e-Table 4   |
| Risk of bias across studies   | 22 | Present results of any assessment of risk of bias across studies (see Item 15).                                                                                                                          | Page 12                   |
| Additional analysis           | 23 | Give results of additional analyses, if done (e.g., sensitivity or subgroup analyses, meta-regression [see Item 16]).                                                                                    | Page 12                   |
| <b>DISCUSSION</b>             |    |                                                                                                                                                                                                          |                           |
| Summary of evidence           | 24 | Summarize the main findings including the strength of evidence for each main outcome; consider their relevance to key groups (e.g., healthcare providers, users, and policy makers).                     | Page 12                   |
| Limitations                   | 25 | Discuss limitations at study and outcome level (e.g., risk of bias), and at review-level (e.g., incomplete retrieval of identified research, reporting bias).                                            | Page 13-14                |
| Conclusions                   | 26 | Provide a general interpretation of the results in the context of other evidence, and implications for future research.                                                                                  | Page 14                   |
| <b>FUNDING</b>                |    |                                                                                                                                                                                                          |                           |
| Funding                       | 27 | Describe sources of funding for the systematic review and other support (e.g., supply of data); role of funders for the systematic review.                                                               | Page 15                   |

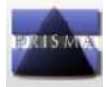

# PRISMA 2009 Checklist

For more information, visit: [www.prisma-statement.org](http://www.prisma-statement.org).

For peer review only

1  
2  
3  
4  
5  
6  
7  
8  
9  
10  
11  
12  
13  
14  
15  
16  
17  
18  
19  
20  
21  
22  
23  
24  
25  
26  
27  
28  
29  
30  
31  
32  
33  
34  
35  
36  
37  
38  
39  
40  
41  
42  
43  
44  
45  
46  
47

| Checklist items for Meta-analyses of Observational Studies in Epidemiology (MOOSE)                           | Reported      |
|--------------------------------------------------------------------------------------------------------------|---------------|
|                                                                                                              | on Page       |
| Reporting of background should include                                                                       |               |
| • Problem definition                                                                                         | Page 4-5      |
| • Hypothesis statement                                                                                       | Not described |
| • Description of study outcome(s)                                                                            | Page 5        |
| • Type of exposure or intervention used                                                                      | Page 5        |
| • Type of study designs used                                                                                 | Page 5        |
| • Study population                                                                                           | Page 5        |
| Reporting of search strategy should include                                                                  |               |
| • Qualifications of searchers (eg, librarians and investigators)                                             | Page 6        |
| • Search strategy, including time period included in the synthesis and keywords                              | Page 6        |
|                                                                                                              | e-Appendix    |
| • Effort to include all available studies, including contact with authors                                    | Page 6        |
| • Databases and registries searched                                                                          | Page 6        |
| • Search software used, name and version, including special features used (eg, explosion)                    | Not described |
| • Use of hand searching (eg, reference lists of obtained articles)                                           | Page 6        |
| • List of citations located and those excluded, including justification                                      | e-Figure 1    |
| • Method of addressing articles published in languages other than English                                    | Page 5        |
| • Method of handling abstracts and unpublished studies                                                       | Page 5        |
| • Description of any contact with authors                                                                    | Not described |
| Reporting of methods should include                                                                          |               |
| • Description of relevance or appropriateness of studies assembled for assessing the hypothesis to be tested | Not described |



|    |                                                                                                                                              |               |
|----|----------------------------------------------------------------------------------------------------------------------------------------------|---------------|
| 1  |                                                                                                                                              |               |
| 2  |                                                                                                                                              |               |
| 3  |                                                                                                                                              |               |
| 4  |                                                                                                                                              |               |
| 5  | • Rationale for the selection and coding of data (eg, sound clinical principles or convenience)                                              | Not described |
| 6  | • Documentation of how data were classified and coded (eg, multiple raters, blinding, and interrater reliability)                            | Not described |
| 7  | • Assessment of confounding (eg, comparability of cases and controls in studies where appropriate)                                           | Not described |
| 8  | • Assessment of study quality, including blinding of quality assessors; stratification or regression on possible predictors of study results | Page 6        |
| 9  | • Assessment of heterogeneity                                                                                                                | Page 7        |
| 10 | • Description of statistical methods (eg, complete description of fixed or random effects models, justification of whether the chosen        | Page 7        |
| 11 | models account for predictors of study results, dose-response models, or cumulative meta-analysis) in sufficient detail to be replicated     |               |
| 12 | • Provision of appropriate tables and graphics                                                                                               | e-Figure 1    |
| 13 |                                                                                                                                              | (study flow   |
| 14 |                                                                                                                                              | diagram)      |
| 15 |                                                                                                                                              |               |
| 16 |                                                                                                                                              |               |
| 17 |                                                                                                                                              |               |
| 18 |                                                                                                                                              |               |
| 19 |                                                                                                                                              |               |
| 20 | Reporting of results should include                                                                                                          |               |
| 21 | • Graphic summarizing individual study estimates and overall estimate                                                                        | e-Table 4, 5  |
| 22 | • Table giving descriptive information for each study included                                                                               | e-Table 1     |
| 23 | • Results of sensitivity testing (eg, subgroup analysis)                                                                                     | Page 12       |
| 24 | • Indication of statistical uncertainty of findings                                                                                          | Page 10-11    |
| 25 |                                                                                                                                              | e-Table 4, 5  |
| 26 |                                                                                                                                              |               |
| 27 |                                                                                                                                              |               |
| 28 |                                                                                                                                              |               |
| 29 | Reporting of discussion should include                                                                                                       |               |
| 30 | • Quantitative assessment of bias (eg, publication bias)                                                                                     | Not described |
| 31 | • Justification of exclusion (eg, exclusion of non-English-language citations)                                                               | Not described |
| 32 | • Assessment of quality of included studies                                                                                                  | Page 14       |
| 33 |                                                                                                                                              |               |
| 34 | Reporting of conclusions should include                                                                                                      |               |
| 35 | • Consideration of alternative explanations for observed results                                                                             | Page 13-14    |
| 36 | • Generalization of the conclusions (ie, appropriate for the data presented and within the domain of the literature review)                  | Page 14       |
| 37 |                                                                                                                                              |               |
| 38 |                                                                                                                                              |               |
| 39 |                                                                                                                                              |               |
| 40 |                                                                                                                                              |               |
| 41 |                                                                                                                                              |               |
| 42 |                                                                                                                                              |               |
| 43 |                                                                                                                                              |               |
| 44 |                                                                                                                                              |               |
| 45 |                                                                                                                                              |               |
| 46 |                                                                                                                                              |               |

- 
- Guidelines for future research Page 14
  - Disclosure of funding source Page 15
- 

From Stroup DF, Berlin JA, Morton SC, et al. Meta-analysis of observational studies in epidemiology: a proposal for reporting. Meta-analysis Of Observational Studies in Epidemiology (MOOSE) group. JAMA 2000;283:2008-12.

For peer review only

# BMJ Open

## A systematic review and meta-analysis of prognostic factors of acute exacerbation of idiopathic pulmonary fibrosis

|                                 |                                                                                                                                                                       |
|---------------------------------|-----------------------------------------------------------------------------------------------------------------------------------------------------------------------|
| Journal:                        | <i>BMJ Open</i>                                                                                                                                                       |
| Manuscript ID                   | bmjopen-2019-035420.R1                                                                                                                                                |
| Article Type:                   | Original research                                                                                                                                                     |
| Date Submitted by the Author:   | 05-Mar-2020                                                                                                                                                           |
| Complete List of Authors:       | Kamiya, Hiroyuki; University of Western Australia, School of Population and Global Health<br>Panlaqui, Ogee; Northern Hospital, Department of Intensive Care Medicine |
| <b>Primary Subject Heading</b>: | Respiratory medicine                                                                                                                                                  |
| Secondary Subject Heading:      | Intensive care, Epidemiology                                                                                                                                          |
| Keywords:                       | Interstitial lung disease < THORACIC MEDICINE, Epidemiology < THORACIC MEDICINE, Adult thoracic medicine < THORACIC MEDICINE                                          |
|                                 |                                                                                                                                                                       |

SCHOLARONE™  
Manuscripts

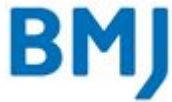

I, the Submitting Author has the right to grant and does grant on behalf of all authors of the Work (as defined in the below author licence), an exclusive licence and/or a non-exclusive licence for contributions from authors who are: i) UK Crown employees; ii) where BMJ has agreed a CC-BY licence shall apply, and/or iii) in accordance with the terms applicable for US Federal Government officers or employees acting as part of their official duties; on a worldwide, perpetual, irrevocable, royalty-free basis to BMJ Publishing Group Ltd ("BMJ") its licensees and where the relevant Journal is co-owned by BMJ to the co-owners of the Journal, to publish the Work in this journal and any other BMJ products and to exploit all rights, as set out in our [licence](#).

The Submitting Author accepts and understands that any supply made under these terms is made by BMJ to the Submitting Author unless you are acting as an employee on behalf of your employer or a postgraduate student of an affiliated institution which is paying any applicable article publishing charge ("APC") for Open Access articles. Where the Submitting Author wishes to make the Work available on an Open Access basis (and intends to pay the relevant APC), the terms of reuse of such Open Access shall be governed by a Creative Commons licence – details of these licences and which [Creative Commons](#) licence will apply to this Work are set out in our licence referred to above.

Other than as permitted in any relevant BMJ Author's Self Archiving Policies, I confirm this Work has not been accepted for publication elsewhere, is not being considered for publication elsewhere and does not duplicate material already published. I confirm all authors consent to publication of this Work and authorise the granting of this licence.

1  
2  
3  
4  
5  
6  
7 **Title page**  
8

9 **Title**  
10

11 A systematic review and meta-analysis of prognostic factors of acute exacerbation of  
12 idiopathic pulmonary fibrosis  
13  
14

15 **Authors**  
16

17 Hiroyuki Kamiya<sup>1\*</sup>, Ogee Mer Panlaqui<sup>2</sup>

18 <sup>1</sup>School of Population and Global Health, University of Western Australia, Perth,  
19 Australia 6009  
20

21 Tel: +61 8 6488 6000  
22

23 Email: mlb04194@nifty.com  
24

25 <sup>2</sup>Department of Intensive Care Medicine, Northern Hospital, Epping, Australia  
26

27 \*corresponding author  
28

29 **Word count**  
30

31 5024  
32  
33  
34  
35  
36  
37  
38  
39  
40  
41  
42  
43  
44  
45  
46  
47  
48  
49  
50  
51  
52  
53  
54  
55  
56  
57  
58  
59  
60

## Abstract

### Objective

To clarify prognostic factors of acute exacerbation (AE) of idiopathic pulmonary fibrosis (IPF).

### Design

A systematic review and meta-analysis.

### Data sources

Medline, EMBASE and Science Citation Index Expanded were searched from 2002 through 1 March 2019.

### Eligibility criteria for selecting studies

The review included primary studies addressing the association between the outcomes such as all-cause mortality of AE of IPF and its potential prognostic factors, which were designated as any clinical information related to the outcomes.

### Data extraction and synthesis

Two reviewers extracted relevant data independently and assessed risk of bias. Univariate results were pooled using a random-effects model if at least three studies were available. Prognostic factors were determined based on significant and consistent results on both univariate and multivariate analyses in the majority of studies.

### Results

Out of a total of 6763 articles retrieved, 37 were eligible and 31 potential prognostic factors for all-cause mortality were selected. Each study was subject to certain methodological shortcomings. The following five factors were statistically significant by a meta-analysis of univariate results, which was confirmed by multivariate analysis, i.e., Acute Physiology and Chronic Health Evaluation (APACHE) II score (hazard ratio (HR) 1.10, 1.01-1.19), partial pressure of arterial oxygen to fraction of inspired oxygen (PaO<sub>2</sub>/FiO<sub>2</sub>) ratio (odds ratios (ORs) 0.31 in one study and 0.99 in three studies), lactate dehydrogenase (LDH) (HRs 1.002, 1.003, 1.01 and 1.02), white blood cell

(WBC) count (OR 1.38, 1.04-1.83) and oxygen therapy before AE (HRs 3.68, 1.05-12.9 and 2.34, 1.04-5.28) (multivariate analysis, 95% confidence interval).

## Conclusions

APACHE II score, PaO<sub>2</sub>/FiO<sub>2</sub> ratio, LDH, WBC count and oxygen therapy before AE were deemed as prognostic factors of AE of IPF. Although there are some methodological limitations in this study, these findings are reliable due to consistent results by both univariate and multivariate analyses.

## Registration

CRD 42018106172

## Keywords

Idiopathic pulmonary fibrosis, acute exacerbation, prognosis, systematic review, meta-analysis

## Article Summary

### Strengths and limitations of this study

- This systematic review and meta-analysis addressed the shortcoming in previous reports of prognostic factors of AE of IPF, which were composed of only small studies and thus may have generated spurious results.
- All primary studies were subject to certain methodological constraints, which undermined the quality of evidence derived from this review.
- An applicability of the findings may be limited because most of the reports constituting this review were derived from only one region.

## Introduction

Interstitial pneumonia (IP) is a heterogeneous clinical entity, which is characterized by common pathological findings of fibrosis in the interstitium of pulmonary parenchyma.[1] Idiopathic pulmonary fibrosis (IPF) is the most common IP among idiopathic IPs (IIPs) with no apparent causes.[2] The disease has been at the centre of vigorous research over the last few decades given the evolution of diagnostic modalities.[3] IPF is known to be a fatal disease leading to respiratory failure due to its natural progression [4] and other comorbidities such as lung cancer, infection and cardiovascular diseases.[5] However, the most common cause of deaths of IPF is the event called an acute exacerbation (AE), occurring in approximately 40% of the cases.[6] This unique phenomenon was first reported as small case series, in which three patients with IPF presented with acute worsening of respiratory symptoms alongside with newly emerging bilateral radiological opacities that were related to no identifiable causes.[7] Subsequently, AE of IPF was recognized as not uncommon phenomenon and defined both clinically and radiologically by the latest international diagnostic criteria.[8] The pathogenesis of AE of IPF is still unknown although previous research disputed whether it is an autonomic acceleration of fibrotic process or an aggravation caused by external stimuli.[9] It is unpredictable in most cases regardless of some risk factors described by previous studies.[10] Once AE of IPF develops, the prognosis of this condition is extremely dismal due to no established therapeutic options.[11] However, there is a variation of mortality in previous reports, e.g., an estimated in-hospital mortality of 80% by an earlier study [12] and 90-day mortality of 70% by a recent study.[13] These discrepancies may suggest that the prognosis of AE of IPF varies between patients although between-study variations may be largely attributed to selection bias.[14] The knowledge of prognostic factors that would determine the prognosis of an individual patient is vital to make a therapeutic strategy, provide patients and families with relevant information to guide their decision-making and help design future research of pharmaceutical intervention.[15] Some research groups previously investigated prognostic factors of AE of IPF.[16] However, these previous findings may be anecdotal because most of them were derived from retrospective studies with a small sample size.[17] In addition, a prospective cohort study to investigate prognostic factors of AE of IPF may be unfeasible because of the unpredictable course of the disease, preventing recruitment of a larger sample size.[18] Therefore, the aim of this systematic review and meta-analysis was to overcome the limitation of a primary study in this research area and summarize current evidence



1  
2  
3  
4  
5  
6 regarding prognostic factors of AE of IPF. This study was registered with International  
7 Prospective Register of Systematic Reviews (PROSPERO) (CRD42018106172).  
8  
9

## 10 **Methods**

11  
12 This review was conducted and reported according to the Preferred Reporting Items for  
13 Systematic Reviews and Meta-Analyses (PRISMA) [19] and the Meta-analysis of  
14 Observational Studies in Epidemiology (MOOSE) statement.[20] The methods were  
15 described briefly as the in-depths of methodology of this study were reported as a  
16 protocol paper beforehand.[21]  
17  
18  
19

### 20 Patient and public involvement

21  
22 There was no patient and public involvement in the whole process of conducting this  
23 research.  
24  
25

### 26 Eligibility criteria

27  
28 Patients with AE of IPF were eligible for this review. AE and IPF were diagnosed based  
29 on previously published international guidelines relevant to respective condition or  
30 disease.[22-23] Subjects who presented with rapidly progressive IP at the first visit was  
31 included if radiological and/or pathological usual interstitial pneumonia (UIP) with no  
32 identifiable causes was confirmed. Only the first episode of AE was eligible if it was  
33 repeatedly manifested. The primary outcomes were short-term all-cause mortality and  
34 pulmonary-cause mortality, which were defined as in-hospital or 30-day mortality. The  
35 secondary outcomes were the proportion of patients discharged from the hospital and  
36 long-term all-cause mortality, which was determined at 90 days (3 months), 180 days (6  
37 months) or 1 year after the diagnosis of the disease. Long-term health-related quality of  
38 life (hQOL) was also considered as the secondary outcome. All primary study types  
39 excluding case reports were considered for the review if quantitative data was available  
40 for any clinical information that had been investigated for their association with the  
41 outcomes. Editorials, letters, review articles and conference proceedings were not  
42 considered. Only research papers published in English in 2002 or later were reviewed as  
43 2002 marked the year when the current classification system of IIPs was first  
44 introduced.[24]  
45  
46  
47  
48  
49  
50  
51  
52  
53  
54

### 55 Search strategy

1  
2  
3  
4  
5  
6 Electronic databases, i.e., Medline (Ovid), EMBASE (Ovid) and Science Citation Index  
7 Expanded (Web of Science) were searched using subject headings and text words  
8 related to study population such as 'idiopathic pulmonary fibrosis' and 'acute  
9 exacerbation' (supplementary e-Appendix). The search was conducted on the 1<sup>st</sup> of  
10 March 2019. The reference lists of eligible studies and relevant review articles were also  
11 hand-searched to find additional reports. Grey literature was identified using Google  
12 Scholar.[25]

#### 16 Study selection and data extraction

17  
18 Two reviewers (H.K. and O.M.P.) independently examined titles and abstracts of all  
19 retrieved articles to identify eligible reports. Data was extracted based on a modified  
20 data extraction form, which was previously published in a protocol paper reviewing  
21 prognostic factors.[26] Extracted data included first author's name, year of publication,  
22 study location, study design, sample size, demographic features of subjects, outcomes,  
23 potential prognostic factors and their effect estimates, methods for statistical analysis  
24 and items associated with risk of bias. Any uncertainties or disagreements between  
25 reviewers arising from these processes were resolved through discussions. Authors were  
26 contacted to inquire about uncertain data or request for additional relevant information.  
27  
28  
29  
30  
31  
32

#### 33 Potential prognostic factors

34  
35 Any clinical information relevant to the pre-defined outcomes, which was reported by a  
36 minimum of three separate studies using either univariate or multivariate analysis, was  
37 further investigated as potential prognostic factors for this review. If the same research  
38 group reported a certain potential prognostic factor for a certain outcome in multiple  
39 studies, only the result derived from the study with the largest sample size was  
40 considered.  
41  
42  
43  
44

#### 45 Risk of bias in individual studies

46  
47 The Quality in Prognostic Studies (QUIPS) tool was applied to assess risk of bias in  
48 individual studies. Overall risk of bias was rated as previously reported.[27]  
49

#### 50 Statistical analysis

##### 51 *Summary statistics and statistical synthesis*

52  
53 The effect of potential prognostic factors was summarized with hazard ratios (HRs),  
54 odds ratios (ORs) or mean differences (MDs) depending on the types of available data.  
55 If an association between a potential prognostic factor and an outcome of interest was  
56  
57  
58  
59  
60

1  
2  
3  
4  
5  
6 presented using the same summary statistics in three or more studies, the results were  
7 statistically combined. Pooled results were summarized separately using HRs, ORs or  
8 MDs. If the unit of MD varied between studies, standardized MD (SMD) was calculated  
9 for meta-analysis.[28] Only unadjusted effect estimates of potential prognostic factors  
10 were combined and the effect estimates derived from multivariate models were  
11 described qualitatively. If meta-analysis was feasible from the collated data, it was  
12 conducted using a random-effects model employing the DerSimonian and Laird  
13 method.[29] Meta-analysis was conducted using the statistical software package,  
14 Review Manager (RevMan) Version 5.3 (Copenhagen: The Nordic Cochrane Centre,  
15 The Cochrane Collaboration, 2014). All the results were presented with the 95%  
16 confidence interval (CI) if available and the 95% prediction interval (PI) was also  
17 calculated if the effect estimates were pooled and there was heterogeneity between  
18 studies.[30] Statistical significance was considered with a p-value of <0.05. If  
19 combining data was deemed inappropriate (due to a small number of studies or  
20 substantial clinical or methodological diversity between studies), the results were  
21 reported qualitatively.

### 22 23 24 25 26 27 28 29 30 31 *Heterogeneity*

32 Between-study variance was estimated using Tau<sup>2</sup> and assessed using both Q statistic  
33 and I<sup>2</sup>. For the assessment of heterogeneity between studies, statistical significance was  
34 considered with a p-value of <0.1 due to the low power of the test. Magnitude of  
35 heterogeneity was categorised as mild (0 to 30%), moderate (30 to 50%), considerable  
36 (50 to 70%) and substantial (70 to 100%).[31] To better interpret sources of  
37 heterogeneity, a subgroup analysis was to be conducted based on the definition of AE of  
38 IPF (idiopathic or triggered),[8] study location (Asia or non-Asia) and sample sizes  
39 (N≤50 or N>50) if there was statistically significant heterogeneity. As mortality was  
40 defined at a varied point in time by each study, it was also considered in subgroup  
41 analysis. Sensitivity analysis was to be conducted focusing on studies with low risk of  
42 bias.

### 43 44 45 46 47 48 49 50 51 *Small study bias*

52 Small study bias such as publication bias was to be examined using graphical  
53 asymmetry of a funnel plot and the Egger's test,[32] if 10 or more studies were  
54 available for meta-analysis. A p-value of <0.1 was considered as statistical significance  
55 due to the low power of the test. If publication bias was suspected, an adjusted summary  
56 effect was to be estimated using the trim and fill method.[33]

## Confirmation of prognostic factors

Prognostic factors were confirmed if their effects were in the same direction and statistically significant in the majority of studies by both univariate and multivariate analyses. If a meta-analysis was conducted, its pooled effect was assigned to each study constituting the analysis in assessing the number of significance and consistency of individual studies. In other words, the effect estimate of individual studies was overridden by the result of meta-analysis to calculate the number of significant and consistent studies.

## Confidence in cumulative evidence

The credibility of evidence generated from this systematic review was assessed by the Grades of Recommendation, Assessment, Development and Evaluation (GRADE) system, which was composed of five domains to rate down the quality of evidence (study limitation, inconsistency, indirectness, publication bias and imprecision) and two domains to rate it up (moderate/large effect size and dose response gradient). [34] The GRADE system was applied to the final list of confirmed prognostic factors generated from both univariate and multivariate results.

## Results

### Search strategy

A total of 6763 reports were identified through Medline, EMBASE, Science Citation Index Expanded and Google Scholar. After excluding 1368 duplicates, 79 non-English records, 3293 reports of ineligible study types (consisting of 1353 conference proceedings, 1068 review articles, 294 editorials or letters and 578 case reports) and 1917 articles that did not relate to the topic of interest, the remaining 106 reports were obtained as full-texts. Out of these, 69 reports were excluded due to no prognosis in 43 studies, IP other than IPF in 12 studies, deterioration other than acute exacerbation in 3 studies, an inclusion of stable IPF in 5 studies, multiple episodes of AE in one study and no quantitative data in 5 studies. Finally, 37 articles/studies [35-71] were eligible for this review (supplementary e-Figure 1, supplementary e-Table 1). No additional reports were identified from other potential sources.

### Overview of included studies and potential prognostic factors

1  
2  
3  
4  
5  
6 A total of 34 studies were conducted in Asia. Out of them the majority of studies took  
7 place in Japan (n=27), followed by Korea (n=6) and China (n=1). Two of the remaining  
8 3 studies were conducted in Italy and the other one was in Greece. Thirty-three studies  
9 utilized a retrospective cohort design and the remaining one was a prospective cohort  
10 study. Twenty-four studies had a sample size of  $\leq 50$  participants and the other 13  
11 studies had 51 to 100 participants, which yielded a total number of 1607 patients  
12 included in this review. The outcomes were all-cause mortality in 35 studies and  
13 disease-related mortality in 2 studies. The measure of hQOL was also described in one  
14 study. A total of 8 research groups conducted multiple studies using the same cohort  
15 and published reports (Collard 2010,[40] Kim 2006,[50] Lee 2012 [54] and Song  
16 2011[62]; Kishaba 2018 [51] and Kishaba 2014 [52]; Enomoto 2015,[41] Enomoto  
17 2018 [42] and Enomoto2019 [43]; Furuya 2017,[45] Isshiki 2015,[46] Koyama 2017  
18 [53] and Sakamoto 2018 [59]; Nikaido 2018 [55] and Sand 2018 [60]; Kataoka  
19 2015,[48] Suzuki 2018 [64] and Yokoyama 2010 [71]; Abe 2012 [35] and Atsumi 2018  
20 [38]; Tomioka 2007 [66] and Yamazoe 2018 [70]) (supplementary e-Table 1). Among  
21 these multiple research conducted by the same groups the study with the largest sample  
22 size was prioritized and a total of 31 potential prognostic factors, which were  
23 investigated for their association with all-cause mortality, were identified and followed  
24 by further analysis (supplementary e-Table 2).

#### 35 Risk of bias

36  
37  
38 The rate of attrition was not explicitly stated and this could have biased the results in the  
39 majority of the studies. There was also high risk of bias regarding confounding,  
40 statistical analysis and reporting in most of the studies. This was determined based on  
41 the finding that relevant potential confounders were not addressed or details regarding  
42 the models used for the analysis were insufficiently provided. Consequently, all studies  
43 were rated as being subject to some methodological flaws (supplementary e-Table 3).

#### 44 Statistical analysis

##### 45 *Confirmation of prognostic factors*

46  
47  
48 All potential prognostic factors were reported using univariate analysis in three or more  
49 studies. Meta-analysis was conducted for 17 out of the total of 31 potential prognostic  
50 factors. The effect estimates of the following 7 factors were in the same direction and  
51 statistically significant in the majority of the studies by univariate analysis. These

1  
2  
3  
4  
5  
6 prognostic factors were as follows; Acute Physiology and Chronic Health Evaluation  
7 (APACHE) II score, extent of ground glass opacity (GGO) and consolidation on high  
8 resolution computed tomography (HRCT) scan, partial pressure of arterial oxygen to  
9 fraction of inspired oxygen (PaO<sub>2</sub>/FiO<sub>2</sub>) ratio, C-reactive protein (CRP), lactate  
10 dehydrogenase (LDH), white blood cell (WBC) and oxygen therapy before AE  
11 (supplementary e-Table 4). Out of the total of 31 potential prognostic factors, 20 were  
12 reported by multivariate analysis, mostly derived from a single or few studies. Among  
13 them, the effect estimates of 9 factors were in the same direction and statistically  
14 significant in the majority of the studies. These prognostic factors were as follows;  
15 APACHE II score, distribution pattern of newly emerging radiological opacities and  
16 extent of abnormality on HRCT scan, PaO<sub>2</sub>/FiO<sub>2</sub> ratio, LDH, WBC, D-dimer,  
17 neutrophil in bronchoalveolar fluid (BAL), oxygen therapy before AE (supplementary  
18 e-Table 5). Based on the pre-defined criteria of prognostic factors that considered both  
19 univariate and multivariate analyses, 5 factors were confirmed as prognostic factors.  
20 The results of the other non-prognostic factors were described in a supplementary file  
21 (supplementary e-Table 4-5, supplementary e-Figure 2-20).

### 31 *Effect of prognostic factors*

32  
33 A total of four studies reported APACHE II score using univariate analysis and the  
34 results of three studies were combined. Based on the combined result, APACHE II  
35 score was significantly associated with all-cause mortality of AE of IPF with an HR of  
36 1.09 (95%CI: 1.04-1.15) (Figure 1). The remaining one study excluded from  
37 meta-analysis demonstrated a higher APACHE II score for non-survivors although it  
38 was not statistically significant (MD 2.80 (95%CI: -1.19-6.79) (Nikaido 2018 [55])  
39 (supplementary e-Table 4). A multivariate analysis reported by one study demonstrated  
40 a significant result with an HR of 1.10 (95%CI: 1.01-1.19) (Kawamura 2017 [49]),  
41 which was consistent with the combined result of univariate analysis (supplementary  
42 e-Table 5).

43  
44 A total of 15 studies reported PaO<sub>2</sub>/FiO<sub>2</sub> ratio using univariate analysis. The results of  
45 six studies were combined using an HR while those of other three and four studies were  
46 combined using an OR and an MD, respectively. Based on the combined results,  
47 PaO<sub>2</sub>/FiO<sub>2</sub> ratio was significantly associated with all-cause mortality of AE of IPF with  
48 an HR of 0.95 (95%CI: 0.92-0.97) (Figure 2) and an OR of 0.92 (95%CI: 0.89-0.95)  
49 (Figure 3). Another result of meta-analysis demonstrated a marginal significance with  
50  
51  
52  
53  
54  
55  
56  
57  
58  
59  
60

1  
2  
3  
4  
5  
6 an MD of -76.3 (95%CI: -153.9-1.28) (Figure 4). Of the remaining two studies excluded  
7 from meta-analysis, one study reported a non-significant lower PaO<sub>2</sub>/FiO<sub>2</sub> ratio for  
8 non-survivors than survivors (195 vs. 240) (Novelli 2016 [56]) whereas the other study  
9 demonstrated a point estimate in the opposite direction from the other studies with no  
10 statistical significance (HR 1.45 (95%CI: 0.71-3.03)) (Sokai 2017 [62]) (supplementary  
11 e-Table 4). A total of five studies reported PaO<sub>2</sub>/FiO<sub>2</sub> ratio using multivariate analysis.  
12 PaO<sub>2</sub>/FiO<sub>2</sub> ratio was demonstrated to be significantly associated with all-cause  
13 mortality in four studies with ORs of 0.99 (95%CI: 0.98-1.00) (Kang 2018 [47]) and  
14 0.99 (95%CI: 0.99-1.00) (Sakamoto 2018 [59]) and HRs of 0.99 (95%CI: 0.99-1.00)  
15 (Kishaba 2018 [51]) and 0.31 (95%CI: 0.14-0.67) (Suzuki 2018 [64]), respectively. In  
16 another study, the effect estimate was null value with no statistical significance  
17 (Yamazoe 2018 [70]). All of these results by multivariate analysis were consistent with  
18 the combined result of univariate analysis when the result with the same summary  
19 statistics was compared although one unit of PaO<sub>2</sub>/FiO<sub>2</sub> ratio to calculate ORs and HRs  
20 were unclear in some studies (supplementary e-Table 5).  
21  
22  
23  
24  
25  
26  
27  
28

29 A total of 13 studies reported LDH using univariate analysis. The results of seven  
30 studies were combined using an HR while those of other four studies were combined  
31 using an SMD. Based on the combined results, LDH was significantly associated with  
32 all-cause mortality of AE of IPF with an HR of 1.02 (95%CI: 1.01-1.02) (Figure 5) and  
33 an SMD of 0.48 (0.11-0.84) (Figure 6), respectively. The remaining two studies  
34 excluded from meta-analysis demonstrated similar non-significant results with ORs of  
35 1.02 (95%CI: 1.00-1.04) (Kang 2018 [47]) and 1.01 (95%CI: 1.00-1.01) (Sakamoto  
36 2018 [59]) (supplementary e-Table 4). A total of five studies reported LDH using  
37 multivariate analysis. LDH was demonstrated to be significantly associated with  
38 all-cause mortality in four studies with HRs of 1.002 (95%CI: 1.000-1.004) (Akira 2008  
39 [36]), 1.003 (95%CI: 1.001-1.005) (Kishaba 2018 [51]), 1.01 (95%CI: 1.00-1.01)  
40 (Enomoto 2018 [42]) and 1.02 (95%CI: 1.00-1.05) (Sokai 2017 [62]). The other one  
41 study demonstrated non-significant result with an OR of 1.00 (95%CI: 1.00-1.00)  
42 (Kang 2018 [47]). All of these results by multivariate analysis were consistent with the  
43 combined result of univariate analysis when the result with the same summary statistics  
44 was compared although one unit of LDH to calculate HRs were unclear in some studies  
45 (supplementary e-Table 5).  
46  
47  
48  
49  
50  
51  
52  
53  
54  
55

56 A total of 10 studies reported WBC using univariate analysis and the results of six  
57 studies were combined. Based on the combined result, non-survivors demonstrated a  
58  
59  
60

1  
2  
3  
4  
5  
6 significantly higher value of WBC than survivors with an MD of 1.35 (95%CI:  
7 0.19-2.51) (Figure 7). All of the remaining four studies excluded from meta-analysis  
8 demonstrated a point estimate of null value (supplementary e-Table 4). A multivariate  
9 analysis reported by one study demonstrated that WBC was significantly associated  
10 with all-cause mortality of AE of IPF with an OR of 1.38 (95%CI: 1.04-1.83) (Yamazoe  
11 2018 [70]) (supplementary e-Table 5).  
12  
13  
14

15  
16 A total of four studies reported oxygen therapy before AE using univariate analysis and  
17 the results of all these studies were combined. Based on the combined result, oxygen  
18 therapy before AE was significantly associated with all-cause mortality of AE of IPF  
19 with an HR of 1.88 (95%CI: 1.15-3.09) (Figure 8). A multivariate analysis reported by  
20 two studies demonstrated that oxygen therapy before AE was significantly associated  
21 with all-cause mortality of AE of IPF with HRs of 3.68 (95%CI: 1.05-12.9) (Enomoto  
22 2018 [42]) and 2.34 (95%CI: 1.04-5.28) (Sokai 2017 [62]). Both results by multivariate  
23 analysis were greater than the combined result of univariate analysis (supplementary  
24 e-Table 5).  
25  
26  
27  
28  
29

### 30 *Adjusted factors in multivariate analysis*

31  
32  
33 A total of 13 studies conducted multivariate analysis. Adjusted factors were clearly  
34 described in six studies where two studies allowed one factor each (Enomoto 2018,[42]  
35 Kataoka 2015 [48]) while the other four studies allowed more than three factors, which  
36 included some of the following prognostic factors, i.e., PaO<sub>2</sub>/FiO<sub>2</sub> ratio, LDH, WBC  
37 count and oxygen therapy before AE (Akira 2008,[36] Kishaba 2018,[51] Sokai  
38 2017,[62] Yamazoe 2018 [70]). Overall, adjusted factors were diverse between studies  
39 (supplementary e-Table 4 and supplementary e-Table 5).  
40  
41  
42  
43  
44

### 45 *Additional analysis*

46  
47 There was substantial heterogeneity in the result of meta-analysis using an MD for  
48 PaO<sub>2</sub>/FiO<sub>2</sub> ratio ( $\chi^2=32.91$ ,  $p<0.00001$ ,  $I^2=91\%$ ) (Figure 4). There was no variability  
49 in the location of study, the number of participants and diagnostic criteria for AE. All  
50 studies were conducted in Japan and included 50 or fewer patients who were diagnosed  
51 by nearly the same criteria. However, the effect of one study (Tsushima 2014 [67]) was  
52 extremely different from that of the other three studies. Meta-analysis excluding this  
53 study generated a significant result with an MD of -117.7 (95%CI: -148.0--87.5) and no  
54 heterogeneity was identified ( $\chi^2=1.69$ ,  $p=0.43$ ,  $I^2=0\%$ ) (supplementary e-Figure 21).  
55  
56  
57  
58  
59  
60



1  
2  
3  
4  
5  
6 Two additional subgroup analyses were conducted for non-prognostic factors (the result  
7 was described in supplementary e-Figure 15, 17) but sensitivity analysis was not  
8 undertaken due to the small number of studies with low risk of bias. Small study bias  
9 including publication bias could not be assessed because the designated minimum  
10 number of studies ( $\geq 10$ ) was not available for meta-analysis of any prognostic factor.  
11  
12

### 13 14 Quality of evidence

15  
16  
17 The starting point for the quality level of all of the evidence generated in this review  
18 was considered moderate because this review was phase 1 explanatory research to  
19 identify the association between the outcome and potential prognostic factors. In  
20 addition, study limitation was considered present in all of the evidence because no  
21 studies were rated as low risk of bias. Publication bias was also assumed to exist as this  
22 was a review for prognostic studies.[34] As a result, the GRADE system rated the  
23 quality of evidence for identified prognostic factors as either low or very low  
24 (supplementary e-Table 6).  
25  
26  
27  
28

### 29 30 Discussion

31  
32  
33 This systematic review and meta-analysis elucidated clinical information predictive of  
34 all-cause mortality of AE of IPF based on both univariate and multivariate analyses.  
35 These prognostic factors consisted of APACHE II score, PaO<sub>2</sub>/FiO<sub>2</sub> ratio, LDH, WBC  
36 and oxygen therapy before AE. The effect of these factors exhibited by pooled analysis  
37 of univariate results was consistent with those derived from multivariate analysis except  
38 for oxygen therapy before AE, which displayed much greater effect by multivariate  
39 analysis. This finding will ensure the reliability of a confirmed list of prognostic factors  
40 and their effect estimates that were presented in this study. The knowledge of  
41 prognostic factors, which are composed of clinical information that is easily accessible  
42 in daily clinical practice, will be of great help in developing therapeutic strategies for  
43 this intractable disease and can be very informative to patients and families in  
44 facilitating their decision-making.  
45  
46  
47  
48  
49  
50

51  
52 Among the identified prognostic factors, oxygen therapy before the development of AE  
53 suggests that the disease has already been in an advanced stage and there remains a  
54 limited capacity of the lung. The PaO<sub>2</sub>/FiO<sub>2</sub> ratio reflects the extent of the damage to  
55 the pulmonary parenchyma and the severity of the disease. LDH is a ubiquitous  
56 molecule distributed over the body and increases in bloodstream after tissue  
57  
58  
59  
60

1  
2  
3  
4  
5  
6 destruction.[72] Accordingly, a higher value of LDH may indicate extensive damage in  
7 the lung although LDH is not a specific marker for pulmonary disease. A non-specific  
8 inflammatory maker such as WBC elevates when the body is exposed to external  
9 stressful circumstances.[73] Therefore, an elevation of WBC may reflect the severity of  
10 the disease although it may possibly be an indicator of occult infection that could not be  
11 identified by ordinary diagnostic procedures. Acute physiologic scoring system such as  
12 APACHE II score is usually applied to in-patients in intensive care unit to assess the  
13 severity of their conditions. It is an established tool and known to correlate to the  
14 prognosis of a disease.[74] Although this system is composed of multiple factors that  
15 are not directly caused by the disease localized to the lung, such as renal dysfunction  
16 and electrolyte disturbance, the wide range of respiratory indexes is also included as its  
17 components. As a result, a higher value of APACHE II score may indicate respiratory  
18 distress caused by severely damaged pulmonary parenchyma.

19  
20  
21  
22  
23  
24  
25  
26 Overall, all of these prognostic factors are indicating progressive or severe disease state.  
27 They are analogous to those of other IPs.[75-76] In particular, oxygenation at  
28 presentation is reported to be predictive of the prognosis of the disease.[18] However,  
29 pulmonary function was not deemed as a prognostic factor in this study. This difference  
30 may suggest that the severity of the insult at the onset of AE is more closely associated  
31 with the subsequent clinical course of the disease. On the other hand, pulmonary state  
32 before AE may foretell the development of this devastating condition.[77] There was  
33 also no association between radiological findings and all-cause mortality of AE of IPF  
34 in this review and this was inconsistent with the previous reports of other IPs.[75-76] In  
35 contrast to the implication of baseline pulmonary function, radiological findings at the  
36 development of AE may directly reflect the damaged area of pulmonary parenchyma.  
37 AE of IPs can be pathologically classified into diffuse alveolar damage (DAD),  
38 organizing pneumonia (OP) and fibroblastic foci.[78] The prognosis of AE is reported  
39 to be closely related to these pathological patterns. In short, DAD demonstrates the  
40 worst prognosis.[79] However, these pathological findings are not necessarily correlated  
41 to radiological findings.[80] This may account for the finding of this review that no  
42 radiological findings were deemed as prognostic of all-cause mortality of AE of IPF.  
43 Previous studies demonstrated that mechanical procedures such as surgery and radiation  
44 [81-82] and the presence of pulmonary hypertension [83-84] can be a risk factor for the  
45 development of AE of IPF. However, these factors were not identified as a prognostic  
46 factor in this review. Although mechanical procedures would be related to the prognosis  
47 of IPF rather than AE of IPF, proper safety precautions, such as risk stratification by  
48  
49  
50  
51  
52  
53  
54  
55  
56  
57  
58  
59  
60

1  
2  
3  
4  
5  
6 baseline pulmonary function should be taken beforehand to prevent the development of  
7 the disease.[81-82] The finding that pulmonary hypertension was not identified as a  
8 prognostic factor of AE of IPF may be explained by the speculation that it may not  
9 necessarily be related to the severity of the insult causing AE, which seems to be  
10 directly associated with the prognosis of this condition.  
11  
12  
13

14 The methodology of this review may have affected the selection and confirmation of  
15 prognostic factors although it had been reported in a protocol paper beforehand.[21]  
16 Potential prognostic factors were defined as any clinical information reported in three or  
17 more studies assuming that frequent reports would likely imply clinical relevance.  
18 However, this arbitrary definition may have missed other potential prognostic factors. In  
19 addition, prognostic factors were confirmed by the results of both univariate and  
20 multivariate analyses based on statistical significance and the effect estimates in the  
21 same direction in the majority of included studies. It is possible that univariate results of  
22 prognostic factors that were confirmed in this review were confounded each other or by  
23 other factors in individual studies. For example, serum makers such as LDH and WBC  
24 may have been influenced by PaO<sub>2</sub>/FiO<sub>2</sub> ratio, which may directly reflect the severity  
25 of the aggression. APACHE II score may also have been confounded by PaO<sub>2</sub>/FiO<sub>2</sub>  
26 ratio because the latter is a component of the former index. Similarly, PaO<sub>2</sub>/FiO<sub>2</sub> ratio  
27 may have been confounded by the extent of radiological abnormalities. Oxygen therapy  
28 before AE may have been reflecting impaired pulmonary function at baseline. However,  
29 at least on a study level, these potential confounding effects were not considered too  
30 serious to conduct meta-analysis because there was no concerning heterogeneity  
31 between studies except for PaO<sub>2</sub>/FiO<sub>2</sub> ratio summarized by an MD. Although it was  
32 desirable to investigate the effect of other factors on combined univariate results, a  
33 further analysis such as meta-regression was not conducted due to a small number of  
34 studies. However, the effect of confirmed prognostic factors revealed by pooled analysis  
35 of univariate results was consistent with those derived from multivariate analysis.  
36 Therefore, the effect estimates by meta-analysis of univariate results do not seem to be  
37 unreliable although the result of multivariate analysis should also be interpreted with  
38 caution. Multivariate analysis was conducted in a total of 13 studies. Of these, adjusted  
39 factors were clearly described in only six studies where only a single confounder with  
40 less relevance was adjusted in two studies each and adjusted factors were diverse in the  
41 other four studies. Furthermore, the results of multivariate analysis for all potential  
42 prognostic factors except for two were derived from only a single or few studies. As a  
43 result, a confirmation of prognostic factors was influenced by the results of this small  
44  
45  
46  
47  
48  
49  
50  
51  
52  
53  
54  
55  
56  
57  
58  
59  
60

1  
2  
3  
4  
5  
6 number of studies, which may have turned out to be statistically significant by chance or  
7 non-significant due to low statistical power. These are the major methodological  
8 limitations of this review.  
9

10  
11 There is also some caveat that needs to be kept in mind to interpret the findings of this  
12 review. First, each study included in this review reported all-cause mortality at an  
13 arbitrary point in time such as in-hospital, 30 days, 90 days and overall. However,  
14 subgroup analysis was limited due to a small number of studies included for  
15 meta-analysis. Instead, causative clinical and/or methodological differences were sought  
16 to be identified qualitatively if there was statistically significant heterogeneity between  
17 studies. Second, most of the studies in this review were conducted in Japan. This  
18 finding may be related to the fact that AE of IPF was first reported by Japanese research  
19 group [7] and subsequently investigated vigorously in Japan.[85] In addition, it is  
20 reported that Japanese patients would more frequently develop progressive IP secondary  
21 to other medical conditions such as connective tissue disease [86] and drug toxicity.[87]  
22 Therefore, it is possible that Japanese people may be genetically more susceptible to AE  
23 of IPF, which may have led to more reports from Japan although the incidence of AE  
24 was similar between ethnicities in a recent study.[88] This unbalanced report will limit  
25 an applicability of the findings of this review because they were mostly derived from  
26 data of Japanese patients. Third, the quality of evidence of this review was deemed low  
27 or very low for all prognostic factors by the GRADE system. This is mostly because of  
28 methodological shortcomings in all studies where many potential confounders were not  
29 addressed or details were insufficiently provided regarding the models used for the  
30 analysis. This may also be related to the fact that all included studies were of  
31 retrospective design with a small sample size conducted in a single medical institution.  
32 Therefore, further research of high quality, in particular, a prospective cohort study  
33 involving multi-institutions in different countries, is imperative to make a definitive  
34 conclusion. Finally, other clinical information that was not addressed in this review may  
35 have the potential as a prognostic factor for AE of IPF. For example, increased  
36 monocyte count has recently been presented as a cellular biomarker for poor prognosis  
37 of IPF.[89] Future studies should investigate their role in AE of IPF.  
38  
39  
40  
41  
42  
43  
44  
45  
46  
47  
48  
49  
50  
51

## 52 53 **Conclusion**

54  
55 This systematic review and meta-analysis demonstrated that APACHE II score,  
56 PaO<sub>2</sub>/FiO<sub>2</sub> ratio, LDH, WBC count and oxygen therapy before AE were deemed as  
57  
58  
59  
60

1  
2  
3  
4  
5 prognostic factors of AE of IPF. Although there are some methodological limitations in  
6 this study, these findings are reliable due to consistent results by both univariate and  
7 multivariate analyses.  
8  
9

### 10 11 12 **Ethics approval and participant consent**

13  
14  
15 Neither ethics approval nor participant consent was required as this study was based  
16 solely on the summary results of previously published articles. Individual patient data  
17 were not obtained or accessed.  
18  
19

### 20 21 **Data sharing**

22  
23  
24 The dataset used and/or analyzed for this review will be available from the  
25 corresponding author upon a reasonable request and may become open to the public  
26 through a digital repository (such as Dryad) after the final result is published in a  
27 journal.  
28  
29

### 30 31 **Conflict of interest**

32  
33  
34  
35 None to declare.  
36  
37

### 38 39 **Funding**

40  
41  
42 This research received no specific grant from any funding agency in either the public,  
43 commercial, or not-for-profit sectors.  
44  
45

### 46 47 **Authors' contributions**

48  
49 H.K. planned the entire research project and analysed the data. He also summarized the  
50 result and wrote the manuscript. H.K. has full access to the data and takes responsibility  
51 for its integrity as well as the accuracy of the analysis.  
52  
53

54  
55 O.M.P. contributed to the design of the research project and conducted the literature  
56 search and data extraction. He was also involved in revising the manuscript.  
57  
58

1  
2  
3  
4  
5 All researchers provided thoughts and opinions to compile a draft paper with revisions  
6 and then approved of the final version of the manuscript.  
7  
8  
9  
10  
11  
12  
13  
14  
15  
16  
17  
18  
19  
20  
21  
22  
23  
24  
25  
26  
27  
28  
29  
30  
31  
32  
33  
34  
35  
36  
37  
38  
39  
40  
41  
42  
43  
44  
45  
46  
47  
48  
49  
50  
51  
52  
53  
54  
55  
56  
57  
58  
59  
60

For peer review only

## References

1. Travis WD, Costabel U, Hansell DM, et al. An official American Thoracic Society/European Respiratory Society statement: update of the international multidisciplinary classification of the idiopathic interstitial pneumonias. *Am J Respir Crit Care Med* 2013;188:733-48.
2. American Thoracic Society. Idiopathic pulmonary fibrosis: diagnosis and treatment. International consensus statement. *Am J Respir Crit Care Med* 2000;161:646-64.
3. King TE, Jr. Clinical advances in the diagnosis and therapy of the interstitial lung diseases. *Am J Respir Crit Care Med* 2005;172:268-79.
4. Panos RJ, Mortenson RL, Niccoli SA, et al. Clinical deterioration in patients with idiopathic pulmonary fibrosis: causes and assessment. *Am J Med* 1990;88:396-404.
5. Raghu G, Amatto VC, Behr J, et al. Comorbidities in idiopathic pulmonary fibrosis patients: a systematic literature review. *Eur Respir J* 2015;46:1113-30.
6. Ley B, Collard HR, King TE, Jr. Clinical course and prediction of survival in idiopathic pulmonary fibrosis. *Am J Respir Crit Care Med* 2011;183:431-40.
7. Kondoh Y, Taniguchi H, Kawabata Y, et al. Acute exacerbation in idiopathic pulmonary fibrosis. Analysis of clinical and pathologic findings in three cases. *Chest* 1993;103:1808-12.
8. Collard HR, Ryerson CJ, Corte TJ, et al. Acute Exacerbation of Idiopathic Pulmonary Fibrosis. An international working group report. *Am J Respir Crit Care Med* 2016;194:265-75.
9. Kim DS. Acute exacerbation of idiopathic pulmonary fibrosis. *Clin Chest Med* 2012;33:59-68.
10. Qiu M, Chen Y, Ye Q. Risk factors for acute exacerbation of idiopathic pulmonary fibrosis: a systematic review and meta-analysis. *Clin Respir J* 2018;12:1084-92.
11. Raghu G, Collard HR, Egan JJ, et al. An official ATS/ERS/JRS/ALAT statement: idiopathic pulmonary fibrosis: evidence-based guidelines for diagnosis and management. *Am J Respir Crit Care Med* 2011;183:788-824.
12. Ambrosini V, Cancellieri A, Chilosi M, et al. Acute exacerbation of idiopathic pulmonary fibrosis: report of a series. *Eur Resp J* 2003;22:821-6.
13. Tachikawa R, Tomii K, Ueda H, et al. Clinical features and outcome of acute exacerbation of interstitial pneumonia: collagen vascular diseases-related versus idiopathic. *Respiration* 2012;83:20-7.

14. Mann CJ. Observational research methods. Research design II: cohort, cross sectional, and case-control studies. *Emerg Med J* 2003;20:54-60.
15. Riley RD, Hayden JA, Steyerberg EW, et al. Prognosis research strategy (PROGRESS) 2: prognostic factor research. *PLoS Med* 2013;10:e1001380.
16. Simon-Blancal V, Freynet O, Nunes H, et al. Acute exacerbation of idiopathic pulmonary fibrosis: outcome and prognostic factors. *Respiration* 2012;83:28-35.
17. Agarwal R, Jindal SK. Acute exacerbation of idiopathic pulmonary fibrosis: a systematic review. *Eur J Intern Med* 2008;19:227-35.
18. Kamiya H, Panlaqui OM, Izumi S, et al. Systematic review and meta-analysis of prognostic factors for idiopathic inflammatory myopathy-associated interstitial lung disease. *BMJ Open* 2018;8:e023998.
19. Moher D, Liberati A, Tetzlaff J, et al. Preferred reporting items for systematic reviews and meta-analyses: the PRISMA statement. *Ann Intern Med* 2009;151:264-9.
20. Stroup DF, Berlin JA, Morton SC, et al. Meta-analysis of observational studies in epidemiology: a proposal for reporting. Meta-analysis of observational studies in epidemiology (MOOSE) group. *JAMA* 2000;283:2008-12.
21. Kamiya H, Panlaqui OM. Prognostic factors for acute exacerbation of idiopathic pulmonary fibrosis: protocol for a systematic review and meta-analysis. *BMJ Open* 2019;9:e028226.
22. Collard HR, Moore BB, Flaherty KR, et al. Acute exacerbations of idiopathic pulmonary fibrosis. *Am J Respir Crit Care Med* 2007;176:636-43.
23. Raghu G, Remy-Jardin M, Myers JL, et al. Diagnosis of idiopathic pulmonary fibrosis. An official ATS/ERS/JRS/ALAT clinical practice guideline. *Am J Respir Crit Care Med* 2018;198:e44-e68.
24. American Thoracic Society. American Thoracic Society/European Respiratory Society international multidisciplinary consensus classification of the idiopathic interstitial pneumonias. *Am J Respir Crit Care Med* 2002;165:277-304.
25. Haddaway NR, Collins AM, Coughlin D, et al. The role of google scholar in evidence reviews and its applicability to grey literature searching. *PLoS One*. 2015;10:e0138237.
26. Kamiya H, Panlaqui OM. Prognostic significance of autoantibodies for idiopathic pulmonary fibrosis: protocol for a systematic review. *BMJ Open* 2018;8:e020862.
27. Hayden JA, Cote P, Bombardier C. Evaluation of the quality of prognosis studies in systematic reviews. *Ann Intern Med* 2006;144:427-37.



- 1
- 2
- 3
- 4
- 5
- 6 28. Hedges LV. Distribution theory for Glass's estimator of effect size and related
- 7 estimators. *J Educ Behav Stat* 1981;6:107-28.
- 8
- 9 29. DerSimonian R, Laird N. Meta-analysis in clinical trials. *Control Clin Trials*
- 10 1986;7:177-88.
- 11
- 12 30. Riley RD, Higgins JP, Deeks JJ. Interpretation of random effects
- 13 meta-analyses. *BMJ* 2011;342:d549.
- 14
- 15 31. Higgins JPT, Green S, eds. *Cochrane Handbook for Systematic Reviews of*
- 16 *Interventions Version 5.1.0 [updated March 2011]*. The Cochrane Collaboration 2011.
- 17 Available from: <http://www.handbook.cochrane.org>.
- 18
- 19 32. Egger M, Davey Smith G, Schneider M, et al. Bias in meta-analysis detected
- 20 by a simple, graphical test. *BMJ* 1997;315:629-34.
- 21
- 22 33. Duval S, Tweedie R. Trim and fill: a simple funnel-plot-based method of
- 23 testing and adjusting for publication bias in meta-analysis. *Biometrics* 2000;56:455-63.
- 24
- 25 34. Huguet A, Hayden JA, Stinson J, et al. Judging the quality of evidence in
- 26 reviews of prognostic factor research: adapting the GRADE framework. *Syst Rev*
- 27 2013;2:71.
- 28
- 29 35. Abe S, Azuma A, Mukae H, et al. Polymyxin B-immobilized fiber column
- 30 (PMX) treatment for idiopathic pulmonary fibrosis with acute exacerbation: a
- 31 multicenter retrospective analysis. *Intern Med* 2012;51:1487-91.
- 32
- 33 36. Akira M, Kozuka T, Yamamoto S, et al. Computed tomography findings in
- 34 acute exacerbation of idiopathic pulmonary fibrosis. *Am J Respir Crit Care Med*
- 35 2008;178:372-8.
- 36
- 37 37. Anzai M, Fukushima Y, Obara K, et al. Clinical characteristics of acute
- 38 exacerbations of idiopathic pulmonary fibrosis and involvement of viral, mycoplasma
- 39 pneumoniae, and chlamydia pneumoniae infections. *Dokkyo J Med Sci*
- 40 2013;40:9-16.
- 41
- 42 38. Atsumi K, Saito Y, Kuse N, et al. Prognostic factors in the acute exacerbation
- 43 of idiopathic pulmonary fibrosis: a retrospective single-center study. *Intern Med*
- 44 2018;57:655-61.
- 45
- 46 39. Cao M, Swigris JJ, Wang X, et al. Plasma leptin is elevated in acute
- 47 exacerbation of idiopathic pulmonary fibrosis. *Mediators Inflamm* 2016;6940480.
- 48
- 49 40. Collard HR, Calfee CS, Wolters PJ, et al. Plasma biomarker profiles in acute
- 50 exacerbation of idiopathic pulmonary fibrosis. *Am J Physiol Lung Cell Mol Physiol*
- 51 2010;299:L3-7.
- 52
- 53
- 54
- 55
- 56
- 57
- 58
- 59
- 60

- 1  
2  
3  
4  
5  
6 41. Enomoto N, Mikamo M, Oyama Y, et al. Treatment of acute exacerbation of  
7 idiopathic pulmonary fibrosis with direct hemoperfusion using a polymyxin  
8 B-immobilized fiber column improves survival. *BMC Pulm Med* 2015;15:15.
- 9  
10 42. Enomoto N, Oyama Y, Enomoto Y, et al. Prognostic evaluation of serum  
11 ferritin in acute exacerbation of idiopathic pulmonary fibrosis. *Clin Respir J*  
12 2018;12:2378-89.
- 13  
14 43. Enomoto N, Oyama Y, Enomoto Y, et al. Differences in clinical features of  
15 acute exacerbation between connective tissue disease-associated interstitial pneumonia  
16 and idiopathic pulmonary fibrosis. *Chronic Respir Dis* 2019;16:1479972318809476.
- 17  
18 44. Fujimoto K, Taniguchi H, Johkoh T, et al. Acute exacerbation of idiopathic  
19 pulmonary fibrosis: high-resolution CT scores predict mortality. *Eur Radiol*  
20 2012;22:83-92.
- 21  
22 45. Furuya K, Sakamoto S, Shimizu H, et al. Pirfenidone for acute exacerbation of  
23 idiopathic pulmonary fibrosis: a retrospective study. *Respir Med* 2017;126:93-9.
- 24  
25 46. Isshiki T, Sakamoto S, Kinoshita A, et al. Recombinant human soluble  
26 thrombomodulin treatment for acute exacerbation of idiopathic pulmonary fibrosis: a  
27 retrospective study. *Respiration* 2015;89:201-7.
- 28  
29 47. Kang HS, Cho KW, Kwon SS, et al. Prognostic significance of Glasgow  
30 prognostic score in patients with acute exacerbation of idiopathic pulmonary fibrosis.  
31 *Respirology* 2018;23:206-12.
- 32  
33 48. Kataoka K, Taniguchi H, Kondoh Y, et al. Recombinant human  
34 thrombomodulin in acute exacerbation of idiopathic pulmonary fibrosis. *Chest*  
35 2015;148:436-43.
- 36  
37 49. Kawamura K, Ichikado K, Yasuda Y, et al. Azithromycin for idiopathic acute  
38 exacerbation of idiopathic pulmonary fibrosis: a retrospective single-center study. *BMC*  
39 *Pulm Med* 2017;17:94.
- 40  
41 50. Kim D, Park J, Park B, et al. Acute exacerbation of idiopathic pulmonary  
42 fibrosis: frequency and clinical features. *Eur Resp J* 2006;27:143-50.
- 43  
44 51. Kishaba T, Nei Y, Momose M, et al. Clinical characteristics based on the new  
45 criteria of acute exacerbation in patients with idiopathic pulmonary fibrosis. *Eurasian J*  
46 *Med* 2018;50:6-10.
- 47  
48 52. Kishaba T, Tamaki H, Shimaoka Y, et al. Staging of acute exacerbation in  
49 patients with idiopathic pulmonary fibrosis. *Lung* 2014;192:141-9.
- 50  
51 53. Koyama K, Sakamoto S, Isshiki T, et al. The activities of daily living after an  
52 acute exacerbation of idiopathic pulmonary fibrosis. *Intern Med* 2017;56:2837-43.

- 1  
2  
3  
4  
5  
6 54. Lee JS, Song JW, Wolters PJ, et al. Bronchoalveolar lavage pepsin in acute  
7 exacerbation of idiopathic pulmonary fibrosis. *Eur Resp J* 2012;39:352-8.  
8  
9 55. Nikaido T, Tanino Y, Wang X, et al. Serum decorin is a potential prognostic  
10 biomarker in patients with acute exacerbation of idiopathic pulmonary fibrosis. *J*  
11 *Thorac Dis* 2018;10:5346-58.  
12  
13 56. Novelli L, Ruggiero R, De Giacomo F, et al. Corticosteroid and  
14 cyclophosphamide in acute exacerbation of idiopathic pulmonary fibrosis: a single  
15 center experience and literature review. *Sarcoidosis Vasc Diffuse Lung Dis*  
16 2016;33:385-91.  
17  
18 57. Oishi K, Aoe K, Mimura Y, et al. Survival from an acute exacerbation of  
19 idiopathic pulmonary fibrosis with or without direct hemoperfusion with a polymyxin  
20 B-immobilized fiber column: a retrospective analysis. *Intern Med* 2016;55:3551-9.  
21  
22 58. Papiris SA, Kagouridis K, Kolilekas L, et al. Survival in idiopathic pulmonary  
23 fibrosis acute exacerbations: the non-steroid approach. *BMC Pulm Med* 2015;15:162.  
24  
25 59. Sakamoto S, Shimizu H, Isshiki T, et al. Recombinant human soluble  
26 thrombomodulin for acute exacerbation of idiopathic pulmonary fibrosis: A historically  
27 controlled study. *Respir Investig* 2018;56:136-43.  
28  
29 60. Sand JMB, Tanino Y, Karsdal MA, et al. A serological biomarker of versican  
30 degradation is associated with mortality following acute exacerbations of idiopathic  
31 interstitial pneumonia. *Respir Res* 2018;19:82.  
32  
33 61. Saraya T, Kimura H, Kurai D, et al. Clinical significance of respiratory virus  
34 detection in patients with acute exacerbation of interstitial lung diseases. *Respir Med*  
35 2018;136:88-92.  
36  
37 62. Sokai A, Tanizawa K, Handa T, et al. Asymmetry in acute exacerbation of  
38 idiopathic pulmonary fibrosis. *ERS Open Res* 2017;3:00036-2016.  
39  
40 63. Song JW, Hong S-B, Lim C-M, et al. Acute exacerbation of idiopathic  
41 pulmonary fibrosis: incidence, risk factors and outcome. *Eur Resp J* 2011;37:356-63.  
42  
43 64. Suzuki A, Taniguchi H, Ando M, et al. Prognostic evaluation by oxygenation  
44 with positive end-expiratory pressure in acute exacerbation of idiopathic pulmonary  
45 fibrosis: a retrospective cohort study. *Clin Respir J* 2018;12:895-903.  
46  
47 65. Takei R, Arita M, Kumagai S, et al. Impact of lymphocyte differential count >  
48 15% in BALF on the mortality of patients with acute exacerbation of chronic fibrosing  
49 idiopathic interstitial pneumonia. *BMC Pulm Med* 2017;17:67.  
50  
51 66. Tomioka H, Sakurai T, Hashimoto K, et al. Acute exacerbation of idiopathic  
52 pulmonary fibrosis: role of chlamydomydia pneumoniae infection. *Respirology*  
53 2007;12:700-6.  
54  
55  
56  
57  
58  
59  
60

- 1  
2  
3  
4  
5  
6 67. Tsushima K, Yamaguchi K, Kono Y, et al. Thrombomodulin for acute  
7 exacerbations of idiopathic pulmonary fibrosis: a proof of concept study. *Pulm*  
8 *Pharmacol and Ther* 2014;29:233-40.  
9  
10 68. Vianello A, Molena B, Turato C, et al. Pirfenidone improves the survival of  
11 patients with idiopathic pulmonary fibrosis hospitalized for acute exacerbation. *Curr*  
12 *Med Res Opin* 2019;35:1187-90.  
13  
14 69. Wootton SC, Kim DS, Kondoh Y, et al. Viral infection in acute exacerbation of  
15 idiopathic pulmonary fibrosis. *Am J Respir Crit Care Med* 2011;183:1698-702.  
16  
17 70. Yamazoe M, Tomioka H. Acute exacerbation of idiopathic pulmonary fibrosis:  
18 a 10-year single-centre retrospective study. *BMJ Open Respir Res* 2018;5:e000342.  
19  
20 71. Yokoyama T, Kondoh Y, Taniguchi H, et al. Noninvasive ventilation in acute  
21 exacerbation of idiopathic pulmonary fibrosis. *Intern Med* 2010;49:1509-14.  
22  
23 72. Szucs MM, Brooks HL, Grossman W, et al. Diagnostic sensitivity of laboratory  
24 findings in acute pulmonary embolism. *Ann Intern Med* 1971;74:161-+.  
25  
26 73. Ware LB, Matthay MA. The acute respiratory distress syndrome. *N Engl J Med*  
27 2000;342:1334-49.  
28  
29 74. Knaus WA, Draper EA, Wagner DP, et al. APACHE II: a severity of disease  
30 classification system. *Crit Care Med* 1985;13:818-29.  
31  
32 75. Winstone TA, Assayag D, Wilcox PG, et al. Predictors of mortality and  
33 progression in scleroderma-associated interstitial lung disease: a systematic review.  
34 *Chest* 2014;146:422-36.  
35  
36 76. Assayag D, Lubin M, Lee JS, et al. Predictors of mortality in rheumatoid  
37 arthritis-related interstitial lung disease. *Respirology* 2014;19:493-500.  
38  
39 77. Kondoh Y, Taniguchi H, Katsuta T, et al. Risk factors of acute exacerbation of  
40 idiopathic pulmonary fibrosis. *Sarcoidosis Vasc Diffuse Lung Dis* 2010;27:103-10.  
41  
42 78. Churg A, Muller NL, Silva CI, et al. Acute exacerbation (acute lung injury of  
43 unknown cause) in UIP and other forms of fibrotic interstitial pneumonias. *Am J Surg*  
44 *Pathol* 2007;31:277-84.  
45  
46 79. Parambil JG, Myers JL, Ryu JH. Histopathologic features and outcome of  
47 patients with acute exacerbation of idiopathic pulmonary fibrosis undergoing surgical  
48 lung biopsy. *Chest* 2005;128:3310-5.  
49  
50 80. Silva CIS, Muller NL, Fujimoto K, et al. Acute exacerbation of chronic  
51 interstitial pneumonia - high-resolution computed tomography and pathologic findings.  
52 *J Thorac Imaging* 2007;22:221-9.  
53  
54 81. Karampitsakos T, Tzilas V, Tringidou R, et al. Lung cancer in patients with  
55 idiopathic pulmonary fibrosis. *Pulm Pharmacol Ther* 2017;45:1-10.  
56  
57  
58  
59  
60

- 1  
2  
3  
4  
5  
6 82. Sato T, Watanabe A, Kondo H, et al. Long-term results and predictors of  
7 survival after surgical resection of patients with lung cancer and interstitial lung  
8 diseases. *J Thorac Cardiovasc Surg* 2015;149:64-70.  
9  
10 83. Karampitsakos T, Tzouvelekis A, Chrysikos S, et al. Pulmonary hypertension  
11 in patients with interstitial lung disease. *Pulm Pharmacol Ther* 2018;50:38-46.  
12  
13 84. Judge EP, Fabre A, Adamali HI, et al. Acute exacerbations and pulmonary  
14 hypertension in advanced idiopathic pulmonary fibrosis. *Eur Respir J* 2012;40:93-100.  
15  
16 85. Homma S, Bando M, Azuma A, et al. Japanese guideline for the treatment of  
17 idiopathic pulmonary fibrosis. *Respir Investig* 2018;56:268-91.  
18  
19 86. Koga T, Fujikawa K, Horai Y, et al. The diagnostic utility of anti-melanoma  
20 differentiation-associated gene 5 antibody testing for predicting the prognosis of  
21 Japanese patients with DM. *Rheumatology* 2012;51:1278-84.  
22  
23 87. Inokuma S. Leflunomide-induced interstitial pneumonitis might be a  
24 representative of disease-modifying antirheumatic drug-induced lung injury. *Expert*  
25 *Opin Drug Saf* 2011;10:603-11.  
26  
27 88. Collard HR, Richeldi L, Kim DS, et al. Acute exacerbations in the INPULSIS  
28 trials of nintedanib in idiopathic pulmonary fibrosis. *Eur Respir J* 2017;49:1601339.  
29  
30 89. Scott MKD, Quinn K, Li Q, et al. Increased monocyte count as a cellular  
31 biomarker for poor outcomes in fibrotic diseases: a retrospective, multicentre cohort  
32 study. *Lancet Respir Med* 2019;7:497-508.  
33  
34  
35  
36  
37  
38  
39  
40  
41  
42  
43  
44  
45  
46  
47  
48  
49  
50  
51  
52  
53  
54  
55  
56  
57  
58  
59  
60

## Figure legends

### Figure 1. Forrest plot of the result of univariate analysis for APACHE II score

The result of univariate analysis in 3 studies was pooled for meta-analysis and a total of 194 patients were included. APACHE II score was significantly associated with all-cause mortality with a hazard ratio (HR) of 1.09 (95% confidence interval: 1.04 to 1.15,  $p=0.0009$ ). There was no heterogeneity ( $\chi^2=0.95$ ,  $p=0.62$ ,  $I^2=0\%$ ).

### Figure 2. Forrest plot of the result of univariate analysis for partial pressure of arterial oxygen/fraction of inspired oxygen (PaO<sub>2</sub>/FiO<sub>2</sub>) ratio (combined by hazard ratio)

The result of univariate analysis in 6 studies were pooled for meta-analysis and a total of 325 patients were included. PaO<sub>2</sub>/FiO<sub>2</sub> ratio was significantly associated with all-cause mortality with a hazard ratio (HR) of 0.95 (95% confidence interval: 0.92 to 0.97,  $p<0.0001$ ). There was no heterogeneity ( $\chi^2=4.66$ ,  $p=0.46$ ,  $I^2=0\%$ ).

### Figure 3. Forrest plot of the result of univariate analysis for partial pressure of arterial oxygen/fraction of inspired oxygen (PaO<sub>2</sub>/FiO<sub>2</sub>) ratio (combined by odds ratio)

The result of univariate analysis in 3 studies were pooled for meta-analysis and a total of 236 patients were included. PaO<sub>2</sub>/FiO<sub>2</sub> ratio was significantly associated with all-cause mortality with an odds ratio (OR) of 0.92 (95% confidence interval: 0.89 to 0.95,  $p<0.00001$ ). There was mild heterogeneity with no statistical significance ( $\chi^2=2.46$ ,  $p=0.29$ ,  $I^2=19\%$ ). The 95% prediction interval ranged from 0.75 to 1.13.

### Figure 4. Forrest plot of the result of univariate analysis for partial pressure of arterial oxygen/ fraction of inspired oxygen (PaO<sub>2</sub>/FiO<sub>2</sub>) ratio (combined by mean difference)

The result of univariate analysis in 4 studies was pooled for meta-analysis and a total of 118 patients were included. There was no significant difference of PaO<sub>2</sub>/FiO<sub>2</sub> ratio between non-survivors and survivors with a mean difference (MD) of -76.3 mmHg (95% confidence interval: -153.9 to 1.28,  $p=0.05$ ). There was substantial heterogeneity with statistical significance ( $\chi^2=32.91$ ,  $p<0.00001$ ,  $I^2=91\%$ ). The 95% prediction interval ranged from -435.2 to 282.6. All studies were conducted in Japan and implemented nearly the same definition of AE of IPF. The number of included patients were 50 or fewer in all studies. The effect of one study (Tsushima 2014 [67]) was extremely different from that of the other three studies. It analysed 28-day all-cause mortality whereas the other three studies analysed either in-hospital, 60-day or overall all-cause mortality.

1  
2  
3  
4  
5  
6 Figure 5. Forrest plot of the result of univariate analysis for lactate dehydrogenase  
7 (LDH) (combined by hazard ratio)  
8

9  
10 The result of univariate analysis in 7 studies was pooled for meta-analysis and a total of  
11 425 patients were included. LDH was significantly associated with all-cause mortality  
12 with a hazard ratio (HR) of 1.02 (95% confidence interval: 1.01 to 1.02,  $p < 0.00001$ ).  
13 There was no heterogeneity ( $\chi^2 = 5.58$ ,  $p = 0.47$ ,  $I^2 = 0\%$ ).  
14  
15

16 Figure 6. Forrest plot of the result of univariate analysis for lactate dehydrogenase  
17 (LDH) (combined by standardized mean difference)  
18

19  
20 The result of univariate analysis in 4 studies was pooled for meta-analysis and a total of  
21 118 patients were included. LDH was significantly associated with all-cause mortality  
22 with a standardized mean difference (SMD) of 0.48 (95% confidence interval: 0.11 to  
23 0.84,  $p = 0.01$ ). There was no heterogeneity ( $\chi^2 = 0.66$ ,  $p = 0.88$ ,  $I^2 = 0\%$ ).  
24  
25

26 Figure 7. Forrest plot of the result of univariate analysis for white blood cell (WBC)  
27 count  
28

29  
30 The result of univariate analysis in 6 studies was pooled for meta-analysis and a total of  
31 242 patients were included. WBC count was significantly associated with all-cause  
32 mortality with a mean difference (MD) of 1.35 (95% confidence interval: 0.19 to 2.51,  
33  $p = 0.02$ ). There was mild heterogeneity with no statistical significance ( $\chi^2 = 6.41$ ,  
34  $p = 0.27$ ,  $I^2 = 22\%$ ). The 95% prediction interval ranged from -1.15 to 3.85.  
35  
36  
37

38 Figure 8. Forrest plot of the result of univariate analysis for oxygen therapy before acute  
39 exacerbation  
40

41  
42 The result of univariate analysis in 4 studies was pooled for meta-analysis and a total of  
43 160 patients were included. Oxygen therapy before acute exacerbation was significantly  
44 associated with all-cause mortality with a hazard ratio (HR) of 1.88 (95% confidence  
45 interval: 1.15 to 3.09,  $p = 0.01$ ). There was no heterogeneity ( $\chi^2 = 2.05$ ,  $p = 0.56$ ,  $I^2 = 0\%$ ).  
46  
47  
48  
49  
50  
51  
52  
53  
54  
55  
56  
57  
58  
59  
60

1  
2  
3  
4  
5  
6  
7  
8  
9  
10  
11  
12  
13  
14  
15  
16  
17  
18  
19  
20  
21  
22  
23  
24  
25  
26  
27  
28  
29  
30  
31  
32  
33  
34  
35  
36  
37  
38  
39  
40  
41  
42  
43  
44  
45  
46  
47  
48  
49  
50  
51  
52  
53  
54  
55  
56  
57  
58  
59  
60

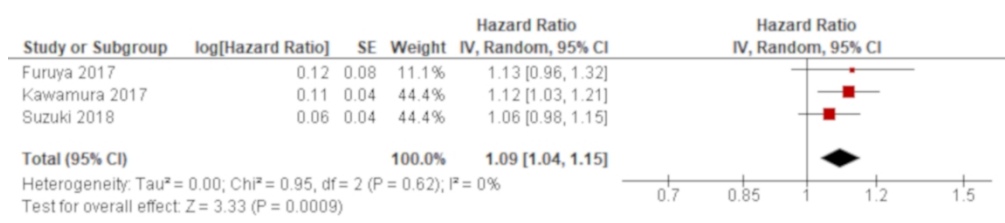

Figure 1

226x50mm (1400 x 1400 DPI)



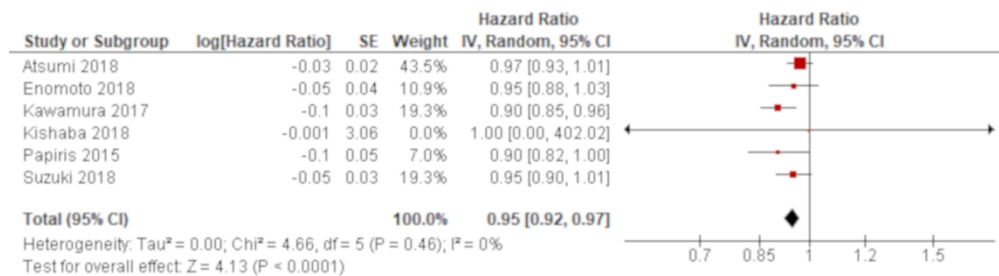

Figure 2

173x50mm (1600 x 1600 DPI)

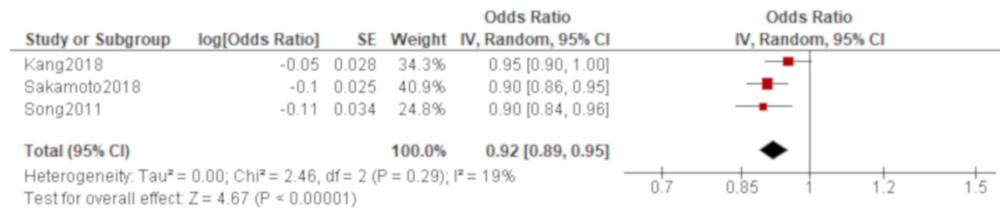

Figure 3

225x50mm (1400 x 1400 DPI)

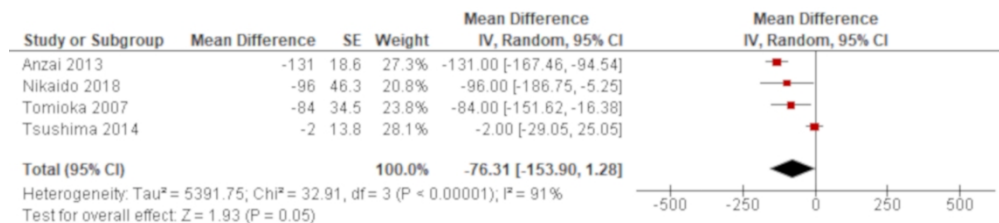

Figure 4

213x50mm (1400 x 1400 DPI)

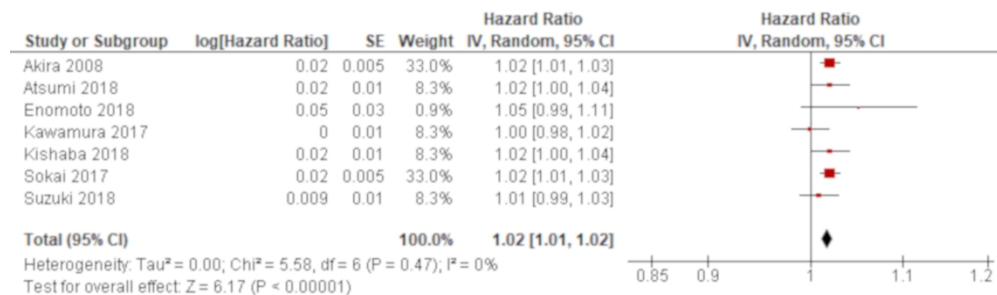

Figure 5

163x50mm (1600 x 1600 DPI)

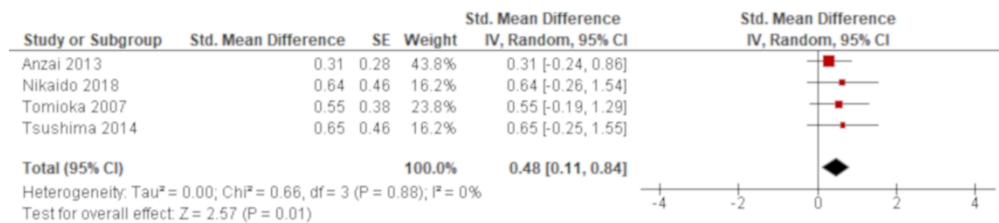

Figure 6

216x50mm (1400 x 1400 DPI)

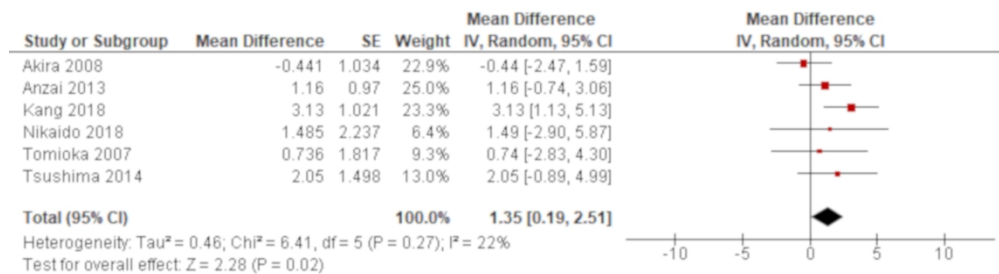

Figure 7

174x50mm (1600 x 1600 DPI)

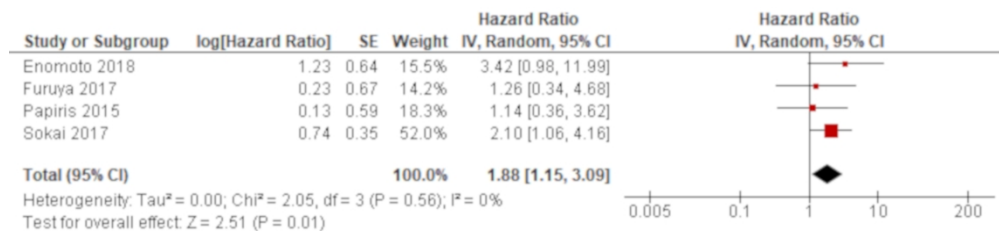

Figure 8

207x50mm (1450 x 1450 DPI)

Supplementary e-Table 1 Characteristics of 37 studies included for the review

| Study                 | Country | Study design            | Patients (n) (M/F) | Age (years) <sup>a</sup>   | Smoking (n (%))                               | Follow-up lengths                  | Outcome                                   | Number of deaths (%) <sup>b</sup>             |
|-----------------------|---------|-------------------------|--------------------|----------------------------|-----------------------------------------------|------------------------------------|-------------------------------------------|-----------------------------------------------|
| Abe 2012<br>[35]      | Japan   | Retrospective<br>cohort | 73 (58/15)         | 67.5±8.2                   | Mean 937 (SD 658)<br>(Smoking index)          | -                                  | All-cause mortality<br>(3-month)          | 48 (65.8)                                     |
| Akira 2008<br>[36]    | Japan   | Retrospective<br>cohort | 58 (44/14)         | Median 66<br>(Range 45-82) | 43 (74.1)                                     | -                                  | All-cause mortality<br>(In-hospital)      | 25 (43.1)                                     |
| Anzai 2013<br>[37]    | Japan   | Retrospective<br>cohort | 50 (41/9)          | 71.0±7.1 <sup>c</sup>      | (74.0)                                        | -                                  | All-cause mortality<br>(Overall)          | 29 (58.0)                                     |
| Atsumi 2018<br>[38]   | Japan   | Retrospective<br>cohort | 59 (49/10)         | Median 74<br>(IQR 66-78)   | Median 800 (IQR 500-1200)<br>(Brinkman index) | -                                  | All-cause mortality<br>(60-day)           | 54 (91.5)                                     |
| Cao 2016<br>[39]      | China   | Retrospective<br>cohort | 30 (23/7)          | 65.0±9.4                   | 9 (30.0)                                      | -                                  | All-cause mortality<br>(Overall)          | 26 (86.7)                                     |
| Collard 2010<br>[40]  | Korea   | Retrospective<br>cohort | 47 (36/11)         | 66.0±8.0                   | 40 (85.1)                                     | -                                  | All-cause mortality<br>(Overall)          | 24 (51.1)                                     |
| Enomoto 2015<br>[41]  | Japan   | Retrospective<br>cohort | 31 (28/3)          | Median 69<br>(Range 50-84) | 27 (87.1)                                     | Median 53 months<br>(Range 2-205)  | All-cause mortality<br>(3-month/12-month) | 12 (38.7) (3 months)<br>23 (74.2) (12 months) |
| Enomoto 2018<br>[42]  | Japan   | Retrospective<br>cohort | 37                 | -                          | -                                             | -                                  | All-cause mortality<br>(3-month)          | 10 (27.0)                                     |
| Enomoto 2019<br>[43]  | Japan   | Retrospective<br>cohort | 37                 | -                          | -                                             | -                                  | All-cause mortality<br>(3-month)          | 7 (18.9)                                      |
| Fujimoto 2012<br>[44] | Japan   | Retrospective<br>cohort | 60 (49/11)         | Median 71<br>(IQR 63-75)   | 48 (80.0)                                     | Median 370 days<br>(Range 39-1230) | Disease-related mortality<br>(Overall)    | 48 (80.0)                                     |



|    |               |       |               |            |                       |            |                    |                     |           |
|----|---------------|-------|---------------|------------|-----------------------|------------|--------------------|---------------------|-----------|
| 1  |               |       |               |            |                       |            |                    |                     |           |
| 2  |               |       |               |            |                       |            |                    |                     |           |
| 3  |               |       |               |            |                       |            |                    |                     |           |
| 4  |               |       |               |            |                       |            |                    |                     |           |
| 5  | Furuya 2017   | Japan | Retrospective | 47 (42/5)  | Range 64-84           | -          | Median 173 days    | All-cause mortality | 27 (57.4) |
| 6  | [45]          |       | cohort        |            |                       |            | (Range 4-1137)     | (Overall)           |           |
| 7  |               |       |               |            |                       |            |                    |                     |           |
| 8  | Isshiki 2015  | Japan | Retrospective | 41 (36/5)  | 72.6±6.4              | 36 (87.8)  | Median 12 months   | All-cause mortality | 29 (70.7) |
| 9  | [46]          |       | cohort        |            |                       |            | (Range 1-143)      | (Overall)           |           |
| 10 |               |       |               |            |                       |            |                    |                     |           |
| 11 | Kang 2018     | Korea | Retrospective | 66 (36/30) | 70.8±9.0 <sup>e</sup> | 30 (45.5)  | -                  | All-cause mortality | 29 (43.9) |
| 12 | [47]          |       | cohort        |            |                       |            |                    | (In-hospital)       |           |
| 13 |               |       |               |            |                       |            |                    |                     |           |
| 14 | Kataoka 2015  | Japan | Retrospective | 40 (36/4)  | Mean 72               | -          | -                  | All-cause mortality | 19 (47.5) |
| 15 | [48]          |       | cohort        |            | (IQR 66-78)           |            |                    | (3-month)           |           |
| 16 |               |       |               |            |                       |            |                    |                     |           |
| 17 | Kawamura 2017 | Japan | Retrospective | 85 (66/19) | Median 76             | -          | -                  | All-cause mortality | 43 (50.6) |
| 18 | [49]          |       | cohort        |            | (IQR 70-80)           |            |                    | (60-day)            |           |
| 19 |               |       |               |            |                       |            |                    |                     |           |
| 20 | Kim 2006      | Korea | Retrospective | 11         | 63.4±6.3              | 6 (75.0)   | -                  | All-cause mortality | 7 (63.6)  |
| 21 | [50]          |       | cohort        |            | (n=8)                 | (n=8)      |                    | (In-hospital)       |           |
| 22 |               |       |               |            |                       |            |                    |                     |           |
| 23 | Kishaba 2018  | Japan | Retrospective | 65 (40/25) | 74.7±11.3             | 37 (56.9)  | -                  | All-cause mortality | -         |
| 24 | [51]          |       | cohort        |            |                       |            |                    | (3-month)           |           |
| 25 |               |       |               |            |                       |            |                    |                     |           |
| 26 | Kishaba 2014  | Japan | Retrospective | 58 (38/20) | 75.0±9.6              | 58 (100.0) | Median 10.2 months | All-cause mortality | - (70.7)  |
| 27 | [52]          |       | cohort        |            |                       |            | (Range 0.1-112)    | (3-month)           |           |
| 28 |               |       |               |            |                       |            |                    |                     |           |
| 29 | Koyama 2017   | Japan | Retrospective | 47 (42/5)  | Median 74             | 42 (89.4)  | -                  | All-cause mortality | 19 (40.4) |
| 30 | [53]          |       | cohort        |            | (Range 58-86)         |            |                    | (3-month)           |           |
| 31 |               |       |               |            |                       |            |                    | Quality of life     |           |
| 32 |               |       |               |            |                       |            |                    |                     |           |
| 33 | Lee 2012      | Korea | Retrospective | 24 (19/5)  | 64.3±9.4 <sup>e</sup> | 19 (79.2)  | Median 74 days     | All-cause mortality | 20 (83.3) |
| 34 | [54]          |       | cohort        |            |                       |            | (IQR15-492)        | (Overall)           |           |
| 35 |               |       |               |            |                       |            |                    |                     |           |
| 36 | Nikaido 2018  | Japan | Retrospective | 21 (21/0)  | 69.7±6.7 <sup>e</sup> | -          | -                  | All-cause mortality | 7 (33.3)  |
| 37 | [55]          |       | cohort        |            |                       |            |                    | (60-day)            |           |
| 38 |               |       |               |            |                       |            |                    |                     |           |
| 39 |               |       |               |            |                       |            |                    |                     |           |
| 40 |               |       |               |            |                       |            |                    |                     |           |
| 41 |               |       |               |            |                       |            |                    |                     |           |
| 42 |               |       |               |            |                       |            |                    |                     |           |
| 43 |               |       |               |            |                       |            |                    |                     |           |
| 44 |               |       |               |            |                       |            |                    |                     |           |
| 45 |               |       |               |            |                       |            |                    |                     |           |
| 46 |               |       |               |            |                       |            |                    |                     |           |

|    |               |        |               |            |                       |           |                  |                           |               |
|----|---------------|--------|---------------|------------|-----------------------|-----------|------------------|---------------------------|---------------|
| 1  |               |        |               |            |                       |           |                  |                           |               |
| 2  |               |        |               |            |                       |           |                  |                           |               |
| 3  |               |        |               |            |                       |           |                  |                           |               |
| 4  |               |        |               |            |                       |           |                  |                           |               |
| 5  | Novelli 2016  | Italy  | Retrospective | 11 (7/4)   | Median 65             | 8 (72.7)  | Median 18 months | All-cause mortality       | - (27.0)      |
| 6  | [56]          |        | cohort        |            | (IQR 55-75)           |           |                  | (3-month)                 |               |
| 7  |               |        |               |            |                       |           |                  |                           |               |
| 8  | Oishi 2016    | Japan  | Retrospective | 50 (46/4)  | 71.7±6.1              | 42 (84.0) | Median 42 days   | Disease-related mortality | 38 (76.0)     |
| 9  | [57]          |        | cohort        |            |                       |           | (Range 1-1656)   | (Overall)                 |               |
| 10 |               |        |               |            |                       |           |                  |                           |               |
| 11 | Papiris 2015  | Greece | Retrospective | 17         | -                     | -         | -                | All-cause mortality       | 11 (39.3)     |
| 12 | [58]          |        | cohort        |            |                       |           |                  | (Overall)                 |               |
| 13 |               |        |               |            |                       |           |                  |                           |               |
| 14 | Sakamoto 2018 | Japan  | Retrospective | 80 (68/12) | 72.9±6.3              | 67 (83.8) | Median 13 months | All-cause mortality       | - (46.3)      |
| 15 | [59]          |        | cohort        |            |                       |           | (Range 1-137)    | (3-month)                 |               |
| 16 |               |        |               |            |                       |           |                  |                           |               |
| 17 | Sand 2018     | Japan  | Retrospective | 28 (28/0)  | 71.0±7.0              | 23 (82.1) | -                | All-cause mortality       | 13 (46.4)     |
| 18 | [60]          |        | cohort        |            |                       |           |                  | (Overall)                 | (at 100 days) |
| 19 |               |        |               |            |                       |           |                  |                           |               |
| 20 | Saraya 2018   | Japan  | Retrospective | 27 (18/9)  | Median 74             | 16 (66.7) | -                | All-cause mortality       | 8 (29.6)      |
| 21 | [61]          |        | cohort        |            | (IQR 70-84)           | (n=24)    |                  | (60-day)                  |               |
| 22 |               |        |               |            |                       |           |                  |                           |               |
| 23 | Sokai 2017    | Japan  | Retrospective | 59 (54/5)  | 71.7±8.2              | 49 (83.1) | -                | All-cause mortality       | - (59.2)      |
| 24 | [62]          |        | cohort        |            |                       |           |                  | (180-day)                 |               |
| 25 |               |        |               |            |                       |           |                  |                           |               |
| 26 | Song 2011     | Korea  | Retrospective | 90 (69/21) | 65.3±7.9              | 59 (65.6) | -                | All-cause mortality       | 45 (50.0)     |
| 27 | [63]          |        | cohort        |            |                       |           |                  | (In-hospital)             |               |
| 28 |               |        |               |            |                       |           |                  |                           |               |
| 29 | Suzuki 2018   | Japan  | Retrospective | 62 (56/6)  | Median 71             | 50 (80.6) | -                | All-cause mortality       | 32 (51.6)     |
| 30 | [64]          |        | cohort        |            | (IQR 64.8-76)         |           |                  | (90-day)                  |               |
| 31 |               |        |               |            |                       |           |                  |                           |               |
| 32 | Takei 2017    | Japan  | Retrospective | 18         | -                     | -         | -                | All-cause mortality       | -             |
| 33 | [65]          |        | cohort        |            |                       |           |                  | (90-day/Overall)          |               |
| 34 |               |        |               |            |                       |           |                  |                           |               |
| 35 | Tomioka 2007  | Japan  | Retrospective | 27 (18/9)  | Mean 71               | 20 (74.1) | -                | All-cause mortality       | 15 (55.6)     |
| 36 | [66]          |        | cohort        |            | (Range 60-85)         |           |                  | (In-hospital)             |               |
| 37 |               |        |               |            |                       |           |                  |                           |               |
| 38 | Tsushima 2014 | Japan  | Retrospective | 20 (14/6)  | 76.8±1.9 <sup>c</sup> | -         | -                | All-cause mortality       | 7 (35.0)      |

|               |       |               |              |                        |          |                  |                       |               |  |
|---------------|-------|---------------|--------------|------------------------|----------|------------------|-----------------------|---------------|--|
| [67]          |       | cohort        |              |                        |          |                  |                       | (28-day)      |  |
| Vianello 2019 | Italy | Retrospective | 20 (15/5)    | 67.0±10.4 <sup>c</sup> | 9 (45.0) | Maximum 370 days | All-cause mortality   | 10 (50.0)     |  |
| [68]          |       | cohort        |              |                        |          |                  | (In-ICU /Overall)     | (In-ICU)      |  |
| Woottoon 2011 | Korea | Prospective   | 43 (88%/12%) | Mean 65                | (84.0)   | -                | All-cause mortality   | - (51.2)      |  |
| [69]          |       | cohort        |              |                        |          |                  | (60-day/Overall)      | (60 days)     |  |
| Yamazoe 2018  | Japan | Retrospective | 57           |                        | -        | -                | All-cause mortality   | 35 (61.4)     |  |
| [70]          |       | cohort        |              |                        |          |                  | (In-hospital/Overall) | (In-hospital) |  |
| Yokoyama 2010 | Japan | Retrospective | 11 (7/4)     | 72.3±7.7               | 8 (72.7) | -                | All-cause mortality   | 6 (54.5)      |  |
| [71]          |       | cohort        |              |                        |          |                  | (3-month)             |               |  |

a, indicates mean±standard deviation unless otherwise specified; b, indicates the number of deaths at each point in time unless otherwise specified; c, calculated using the sample size and median, range or interquartile range in two comparative groups;

IQR, interquartile range;

Supplementary e-Table 2 31 potential prognostic factors for all-cause mortality

---

Demographic characteristics

age, sex, smoking history, BMI, disease duration

Disease severity (staging) of underlying IPF or acute phase

GAP system, JRS classification, APACHE II score

Symptoms (at onset)

Duration of dyspnoea, fever

Pulmonary function tests (at baseline)

FVC, DLCO, FEV1

Radiological features (at onset)

Pattern of distribution, GGO, reticular opacity, extent of GGO and consolidation, extent of abnormality

Laboratory findings (at onset)

PaO<sub>2</sub>/FiO<sub>2</sub> ratio, CRP, LDH, KL-6, SP-D, WBC, D-dimer, FDP, BAL lymphocyte, BAL neutrophil

Treatment before acute exacerbation

Pirfenidone, corticosteroid, oxygen therapy

---

APACHE, acute physiology and chronic health evaluation; BAL, bronchoalveolar lavage; BMI, body mass index; CRP, C-reactive protein; DLCO, diffusion capacity of the lung for carbon monoxide; FDP, fibrin degradation product; FEV1, forced expiratory volume in one second; FVC, forced vital capacity; GAP, gender, age and physiology; GGO, ground glass opacity; HR, hazard ratio; HRCT, high resolution computed tomography; IPF, idiopathic pulmonary fibrosis; JRS, Japanese Respiratory Society; KL-6, Krebs von den Lungen-6; LDH, lactate dehydrogenase; PaO<sub>2</sub>/FiO<sub>2</sub>, partial pressure of arterial oxygen/fraction of inspired oxygen; SP-D, surfactant protein-D; WBC, white blood cell;

Supplementary e-Table 3 Risk of bias in 37 studies included for the review, assessed by the Quality in Prognostic Studies tool<sup>a</sup>

| Study              | study participation | study attrition  | prognostic factor<br>measurement | outcome<br>measurement | study confounding | statistical analysis<br>and reporting |
|--------------------|---------------------|------------------|----------------------------------|------------------------|-------------------|---------------------------------------|
| Abe 2012 [35]      | <b>high risk</b>    | <b>high risk</b> | <b>high risk</b>                 | low risk               | <b>high risk</b>  | <b>high risk</b>                      |
| Akira 2008 [36]    | medium risk         | low risk         | low risk                         | low risk               | medium risk       | <b>high risk</b>                      |
| Anzai 2013 [37]    | low risk            | low risk         | medium risk                      | low risk               | medium risk       | <b>high risk</b>                      |
| Atsumi 2018 [38]   | low risk            | low risk         | low risk                         | low risk               | medium risk       | <b>high risk</b>                      |
| Cao 2016 [39]      | medium risk         | low risk         | low risk                         | low risk               | <b>high risk</b>  | <b>high risk</b>                      |
| Collard 2010 [40]  | medium risk         | <b>high risk</b> | medium risk                      | low risk               | <b>high risk</b>  | <b>high risk</b>                      |
| Enomoto 2015 [41]  | medium risk         | <b>high risk</b> | medium risk                      | low risk               | medium risk       | <b>high risk</b>                      |
| Enomoto 2018 [42]  | medium risk         | <b>high risk</b> | low risk                         | low risk               | medium risk       | <b>high risk</b>                      |
| Enomoto 2019 [43]  | medium risk         | <b>high risk</b> | medium risk                      | low risk               | medium risk       | <b>high risk</b>                      |
| Fujimoto 2012 [44] | low risk            | <b>high risk</b> | low risk                         | low risk               | <b>high risk</b>  | medium risk                           |
| Furuya 2017 [45]   | low risk            | <b>high risk</b> | low risk                         | low risk               | <b>high risk</b>  | <b>high risk</b>                      |
| Isshiki 2015 [46]  | low risk            | <b>high risk</b> | low risk                         | low risk               | medium risk       | <b>high risk</b>                      |
| Kang 2018 [47]     | low risk            | low risk         | low risk                         | low risk               | <b>high risk</b>  | <b>high risk</b>                      |
| Kataoka 2015 [48]  | low risk            | <b>high risk</b> | medium risk                      | low risk               | <b>high risk</b>  | medium risk                           |
| Kawamura 2017 [49] | low risk            | low risk         | low risk                         | low risk               | <b>high risk</b>  | <b>high risk</b>                      |
| Kim 2006 [50]      | medium risk         | <b>high risk</b> | <b>high risk</b>                 | low risk               | medium risk       | <b>high risk</b>                      |
| Kishaba 2018 [51]  | low risk            | <b>high risk</b> | medium risk                      | low risk               | <b>high risk</b>  | <b>high risk</b>                      |
| Kishaba 2014 [52]  | medium risk         | <b>high risk</b> | medium risk                      | low risk               | medium risk       | <b>high risk</b>                      |
| Koyama 2017 [53]   | low risk            | low risk         | medium risk                      | low risk               | <b>high risk</b>  | <b>high risk</b>                      |

1  
2  
3  
4  
5  
6  
7  
8  
9  
10  
11  
12  
13  
14  
15  
16  
17  
18  
19  
20  
21  
22  
23  
24  
25  
26  
27  
28  
29  
30  
31  
32  
33  
34  
35  
36  
37  
38  
39  
40  
41  
42  
43  
44  
45  
46

|                    |                  |                  |                  |          |                  |                  |
|--------------------|------------------|------------------|------------------|----------|------------------|------------------|
| Lee 2012 [54]      | low risk         | <b>high risk</b> | low risk         | low risk | <b>high risk</b> | <b>high risk</b> |
| Nikaido 2018 [55]  | low risk         | low risk         | low risk         | low risk | <b>high risk</b> | <b>high risk</b> |
| Novelli 2016 [56]  | medium risk      | <b>high risk</b> | low risk         | low risk | <b>high risk</b> | <b>high risk</b> |
| Oishi 2016 [57]    | medium risk      | <b>high risk</b> | medium risk      | low risk | <b>high risk</b> | <b>high risk</b> |
| Papiris 2015 [58]  | low risk         | <b>high risk</b> | low risk         | low risk | medium risk      | <b>high risk</b> |
| Sakamoto 2018 [59] | low risk         | <b>high risk</b> | low risk         | low risk | medium risk      | <b>high risk</b> |
| Sand 2018 [60]     | medium risk      | <b>high risk</b> | low risk         | low risk | <b>high risk</b> | <b>high risk</b> |
| Saraya 2018 [61]   | medium risk      | <b>high risk</b> | low risk         | low risk | <b>high risk</b> | <b>high risk</b> |
| Sokai 2017 [62]    | low risk         | <b>high risk</b> | low risk         | low risk | medium risk      | medium risk      |
| Song 2011 [63]     | medium risk      | low risk         | medium risk      | low risk | <b>high risk</b> | <b>high risk</b> |
| Suzuki 2018 [64]   | low risk         | <b>high risk</b> | low risk         | low risk | <b>high risk</b> | medium risk      |
| Takei 2017 [65]    | medium risk      | <b>high risk</b> | low risk         | low risk | <b>high risk</b> | <b>high risk</b> |
| Tomioka 2007 [66]  | low risk         | low risk         | low risk         | low risk | <b>high risk</b> | <b>high risk</b> |
| Tsushima 2014 [67] | medium risk      | low risk         | low risk         | low risk | <b>high risk</b> | <b>high risk</b> |
| Vianello 2019 [68] | <b>high risk</b> | <b>high risk</b> | low risk         | low risk | <b>high risk</b> | <b>high risk</b> |
| Woottoon 2011 [69] | medium risk      | <b>high risk</b> | medium risk      | low risk | <b>high risk</b> | <b>high risk</b> |
| Yamazoe 2018 [70]  | low risk         | <b>high risk</b> | low risk         | low risk | <b>high risk</b> | medium risk      |
| Yokoyama 2010 [71] | medium risk      | low risk         | <b>high risk</b> | low risk | <b>high risk</b> | <b>high risk</b> |

a, Text in bold refers to high risk of bias.

Supplementary e-Table 4 The result of univariate analysis of potential prognostic factors for all-cause mortality

| Potential prognostic factors <sup>a</sup> | Analysis   | Studies (n) <sup>b</sup> | Subjects (n) | Point estimate (+/-) <sup>c</sup> | Result of meta-analysis and non-pooled studies (95% CI) <sup>d</sup> |
|-------------------------------------------|------------|--------------------------|--------------|-----------------------------------|----------------------------------------------------------------------|
| Demographic features                      |            |                          |              |                                   |                                                                      |
| Age                                       | Meta       | 8                        | 405          | 4/2                               | HR 1.00 (0.98-1.02) (/1 year)                                        |
|                                           |            | 3                        | 236          | 3/0                               | OR 1.02 (0.98-1.05) (/1 year)                                        |
|                                           | Not pooled | Kishaba 2014 [52]        | 58           | -/-                               | HR 1.00 (p=0.83) (year)                                              |
|                                           |            | Anzai 2013 [37]          | 50           | 1/0                               | MD 3.50 (-0.48-7.48) (year) (non-survivor vs. survivor)              |
|                                           |            | Tsushima 2014 [67]       | 20           | 0/1                               | <b>MD -4.30 (-6.04--2.56) (year) (non-survivor vs. survivor)</b>     |
| Sex                                       | Meta       | 7                        | 377          | 3/4                               | HR 0.93 (0.65-1.34) (vs. female)                                     |
|                                           |            | 5                        | 306          | 3/2                               | OR 1.28 (0.74-2.21) (vs. female)                                     |
|                                           | Not pooled | Kishaba 2014 [52]        | 58           | 0/1                               | HR 0.90 (p=0.76)                                                     |
| Smoking history                           | Meta       | 3                        | 145          | 2/1                               | HR 0.98 (0.35-2.75) (vs. never-smoker)                               |
|                                           |            | 4                        | 243          | 3/1                               | OR 0.99 (0.59-1.67) (vs. never-smoker)                               |
|                                           |            | 3                        | 116          | 1/1                               | HR 1.00 (0.89-1.11) (/10 pack-year)                                  |
|                                           | Not pooled | Atsumi 2018 [38]         | 59           | 0/1                               | HR 0.95 (0.88-1.02) (/200 Brinkman index)                            |
|                                           |            | Kishaba 2014 [52]        | 58           | 1/0                               | <b>HR 1.01 (p=0.03) (pack-year)</b>                                  |
| BMI                                       | Not pooled | Kang 2018 [47]           | 66           | 0/1                               | MD -0.13 (-2.12-1.86) (non-survivor vs. survivor)                    |
|                                           |            | Suzuki 2018 [64]         | 62           | 1/0                               | HR 1.04 (0.94-1.15) (/1 kg/m <sup>2</sup> )                          |
|                                           |            | Lee 2012 [54]            | 24           | 0/1                               | HR 0.93 (0.82-1.05)                                                  |
|                                           |            |                          |              |                                   |                                                                      |
| Disease duration before AE                | Not pooled | Papiris 2015 [58]        | 17           | 1/0                               | HR 1.01 (1.00-1.03)                                                  |
|                                           |            | Enomoto 2019 [43]        | 37           | -/-                               | HR 1.00 (p=0.82) (/1 month)                                          |
|                                           |            | Song 2011 [63]           | 90           | 0/1                               | OR 0.99 (0.98-1.01) (months)                                         |

|                                                                    |            |                    |     |     |                                                                       |
|--------------------------------------------------------------------|------------|--------------------|-----|-----|-----------------------------------------------------------------------|
|                                                                    |            | Akira 2008 [36]    | 58  | 1/0 | MD 2.00 (-11.6-15.6) (months) (non-survivor vs. survivor)             |
|                                                                    |            | Novelli 2016 [56]  | 11  | 0/1 | 8 vs. 20 (months) (non-survivor vs. survivor)                         |
| <b>Disease severity (staging) of underlying IPF or acute phase</b> |            |                    |     |     |                                                                       |
| GAP system <sup>e</sup>                                            | Not pooled | Atsumi 2018 [38]   | 59  | 1/0 | <b>HR 1.45 (1.10-1.93) (/1 point)</b>                                 |
|                                                                    |            | Enomoto 2018 [42]  | 37  | 1/0 | HR 1.08 (0.48-2.44) (/1 stage)                                        |
|                                                                    |            | Sakamoto 2018 [59] | 80  | 1/0 | OR 1.64 (0.98-2.70) (/1)                                              |
| JRS classification <sup>f</sup>                                    | Not pooled | Atsumi 2018 [38]   | 59  | 1/0 | <b>HR 1.50 (1.17-1.94) (/1 stage)</b>                                 |
|                                                                    |            | Enomoto 2018 [42]  | 37  | 1/0 | HR 2.12 (0.86-5.23)                                                   |
|                                                                    |            | Sakamoto 2018 [59] | 80  | 1/0 | OR 1.28 (0.53-3.13) (advanced (III, IV))                              |
| <b>APACHE II score</b>                                             | Meta       | 3                  | 194 | 3/0 | <b>HR 1.09 (1.04-1.15) (/1 point)</b>                                 |
|                                                                    | Not pooled | Nikaido 2018 [55]  | 21  | 1/0 | MD 2.80 (-1.19-6.79) (non-survivor vs. survivor)                      |
| <b>Symptoms</b>                                                    |            |                    |     |     |                                                                       |
| Duration of dyspnoea                                               | Not pooled | Song 2011 [63]     | 90  | 0/1 | <b>OR 0.94 (0.90-0.98) (days)</b>                                     |
|                                                                    |            | Kishaba 2014 [52]  | 58  | 1/0 | HR 1.01 (p=0.65) (days)                                               |
|                                                                    |            | Kang 2018 [47]     | 66  | 0/1 | MD -6.43 (-15.9-3.04) (days) (non-survivor vs. survivor)              |
| Fever                                                              | Meta       | 3                  | 206 | 2/1 | OR 1.66 (0.74-3.70)                                                   |
|                                                                    | Not pooled | Enomoto 2019 [43]  | 37  | 0/1 | HR 0.51 (p=0.39)                                                      |
| <b>Pulmonary function</b>                                          |            |                    |     |     |                                                                       |
| FVC                                                                | Meta       | 5                  | 199 | 1/3 | HR 0.99 (0.98-1.01) (/1% predicted value)                             |
|                                                                    |            | 3                  | 193 | 1/0 | OR 1.01 (0.99-1.02) (/1% predicted value)                             |
| DLCO                                                               | Meta       | 4                  | 171 | 1/2 | HR 0.99 (0.98-1.01) (/1% predicted value)                             |
|                                                                    | Not pooled | Kang 2018 [47]     | 66  | 0/1 | MD -6.38 (-15.8-3.04) (% predicted value) (non-survivor vs. survivor) |



|                                        |            |                    |     |     |                                                                       |
|----------------------------------------|------------|--------------------|-----|-----|-----------------------------------------------------------------------|
|                                        |            | Sakamoto 2018 [59] | 80  | 1/0 | OR 1.01 (0.98-1.03)                                                   |
| FEV1                                   | Not pooled | Kang 2018 [47]     | 66  | 0/1 | MD -4.36 (-14.1-5.37) (% predicted value) (non-survivor vs. survivor) |
|                                        |            | Koyama 2017 [53]   | 47  | 0/1 | MD -11.0 (-23.8-1.82) (% predicted value) (non-survivor vs. survivor) |
|                                        |            | Papiris 2015 [58]  | 17  | -/- | HR 1.00 (0.94-1.06) (% predicted value)                               |
| <b>Features on HRCT</b>                |            |                    |     |     |                                                                       |
| Pattern                                | Not pooled | Kim 2006 [50]      | 11  | 1/0 | OR 30.3 (0.96-959.6) (multifocal vs. peripheral)                      |
|                                        |            | Anzai 2013 [37]    | 50  | 1/0 | OR 8.00 (0.82-78.0) (diffuse+multifocal vs. peripheral)               |
|                                        |            | Sakamoto 2018 [59] | 80  | 1/0 | OR 1.39 (0.55-3.45) (diffuse)                                         |
|                                        |            | Akira 2008 [36]    | 58  | 1/0 | <b>HR 5.39 (2.60-11.2) (diffuse+multifocal vs. peripheral)</b>        |
|                                        |            | Kawamura 2017 [49] | 85  | 0/1 | HR 0.41 (0.10-1.71) (multifocal)                                      |
| GGO                                    | Not pooled | Sokai 2017 [62]    | 59  | 1/0 | HR 1.01 (0.99-1.03)                                                   |
|                                        |            | Papiris 2015 [58]  | 17  | 1/0 | HR 1.65 (0.74-3.70)                                                   |
|                                        |            | Lee 2012 [54]      | 24  | 1/0 | HR 1.03 (1.00-1.06) (GGO score)                                       |
| Reticular opacity                      | Not pooled | Akira 2008 [36]    | 58  | 1/0 | HR 1.03 (1.00-1.06) (reticulation and honeycombing (%))               |
|                                        |            | Lee 2012 [54]      | 24  | 0/1 | HR 0.96 (0.91-1.01) (reticulation score)                              |
|                                        |            | Kishaba 2014 [52]  | 58  | 1/0 | HR 1.32 (p=0.06) (traction bronchiectasis and honeycombing score)     |
|                                        |            | Sokai 2017 [62]    | 59  | 0/1 | HR 0.98 (0.95-1.02) (reticulation and honeycombing (%))               |
| <b>Extent of GGO and consolidation</b> | Not pooled | Kishaba 2014 [52]  | 58  | 1/0 | <b>HR 1.85 (p=0.03) (score)</b>                                       |
|                                        |            | Akira 2008 [36]    | 58  | 1/0 | <b>HR 1.05 (1.02-1.07) (%)</b>                                        |
|                                        |            | Sokai 2017 [62]    | 59  | 1/0 | HR 1.02 (1.00-1.04) (%)                                               |
| Extent of abnormality                  | Meta       | 3                  | 120 | 3/0 | HR 1.02 (1.00-1.05) (/1 score)                                        |
|                                        |            | Akira 2008 [36]    | 58  | 1/0 | <b>HR 1.07 (1.04-1.10) (%)</b>                                        |

1  
2  
3  
4  
5  
6  
7  
8  
9  
10  
11  
12  
13  
14  
15  
16  
17  
18  
19  
20  
21  
22  
23  
24  
25  
26  
27  
28  
29  
30  
31  
32  
33  
34  
35  
36  
37  
38  
39  
40  
41  
42  
43  
44  
45  
46

| Laboratory findings    |            |                    |     |     |                                                               |  |
|------------------------|------------|--------------------|-----|-----|---------------------------------------------------------------|--|
| <b>PaO2/FiO2 ratio</b> | Meta       | 6                  | 325 | 0/5 | <b>HR 0.95 (0.92-0.97) (/10 mmHg)</b>                         |  |
|                        |            | 3                  | 236 | 0/3 | <b>OR 0.92 (0.89-0.95) (/10 mmHg)</b>                         |  |
|                        |            | 4                  | 118 | 0/4 | MD -76.3 (-153.9-1.28) (non-survivor vs. survivor)            |  |
|                        | Not pooled | Novelli 2016 [56]  | 11  | 0/1 | 195 vs. 240 (non-survivor vs. survivor)                       |  |
| <b>CRP</b>             |            | Sokai 2017 [62]    | 59  | 1/0 | HR 1.45 (0.71-3.03) (≥200)                                    |  |
|                        | Meta       | 4                  | 243 | 3/0 | <b>HR 1.05 (1.02-1.08) (/1mg/dl)</b>                          |  |
|                        |            | 6                  | 242 | 7/0 | <b>SMD 0.69 (0.19-1.18) (non-survivor vs. survivor)</b>       |  |
|                        | Not pooled | Kishaba 2014 [52]  | 58  | 0/1 | HR 0.98 (p=0.47) (mg/dl)                                      |  |
|                        |            | Song 2011 [63]     | 90  | 1/0 | <b>OR 1.09 (1.01-1.17) (mg/dl)</b>                            |  |
| <b>LDH</b>             |            | Sakamoto 2018 [59] | 80  | 1/0 | OR 1.05 (0.97-1.14) (mg/dl)                                   |  |
|                        | Meta       | 7                  | 425 | 6/0 | <b>HR 1.02 (1.01-1.02) (/10 IU/L)</b>                         |  |
|                        |            | 4                  | 118 | 4/0 | <b>SMD 0.48 (0.11-0.84) (non-survivor vs. survivor)</b>       |  |
|                        | Not pooled | Kang 2018 [47]     | 66  | 1/0 | OR 1.02 (1.00-1.04)                                           |  |
| <b>KL-6</b>            |            | Sakamoto 2018 [59] | 80  | 1/0 | OR 1.01 (1.00-1.01) (IU/L)                                    |  |
|                        | Meta       | 4                  | 265 | 3/0 | <b>HR 1.02 (1.01-1.04) (/100 U/mL)</b>                        |  |
|                        |            | 4                  | 118 | 2/2 | MD -23.6 (-119.7-72.5) (×10 U/mL) (non-survivor vs. survivor) |  |
|                        | Not pooled | Kishaba 2014 [52]  | 58  | 1/0 | <b>HR 2.01 (p=0.001) (IU/L)</b>                               |  |
|                        |            | Enomoto 2018 [42]  | 37  | -/- | HR 1.00 (1.00-1.00) (U/mL)                                    |  |
| <b>SP-D</b>            |            | Collard 2010 [40]  | 47  | 0/1 | OR 0.41 (0.06-2.93) (log unit)                                |  |
|                        |            | Sakamoto 2018 [59] | 80  | -/- | OR 1.00 (1.00-1.00) (U/mL)                                    |  |
|                        | Meta       | 4                  | 243 | 0/2 | HR 0.99 (0.99-1.00) (/10 ng/ml)                               |  |
|                        | Not pooled | Anzai 2013 [37]    | 50  | 1/0 | MD 25.0 (-155.6-205.6) (non-survivor vs. survivor) (ng/ml)    |  |

|                     |            |   |                    |     |     |                                                                                        |
|---------------------|------------|---|--------------------|-----|-----|----------------------------------------------------------------------------------------|
|                     |            |   | Nikaido 2018 [55]  | 21  | 1/0 | MD 172.2 (-76.3-420.7) (non-survivor vs. survivor) (ng/ml)                             |
|                     |            |   | Collard 2010 [40]  | 47  | 1/0 | OR 1.23 (0.36-4.21) (log ng/ml)                                                        |
|                     |            |   | Sakamoto 2018 [59] | 80  | 1/0 | OR 1.01 (1.00-1.01) (ng/ml)                                                            |
| <b>WBC</b>          | Meta       | 6 |                    | 242 | 5/1 | <b>MD 1.35 (0.19-2.51) (<math>\times 10^6/mm^3</math>) (non-survivor vs. survivor)</b> |
|                     | Not pooled |   | Kataoka 2015 [48]  | 40  | -/- | OR 1.00 (1.00-1.00) (/mm <sup>3</sup> )                                                |
|                     |            |   | Sakamoto 2018 [59] | 80  | -/- | OR 1.00 (1.00-1.00) (/mm <sup>3</sup> )                                                |
|                     |            |   | Kishaba 2014 [52]  | 58  | -/- | HR 1.00 (p=0.47) (/mm <sup>3</sup> )                                                   |
|                     |            |   | Enomoto 2019 [43]  | 37  | -/- | <b>HR 1.00 (p=0.03) (/ul)</b>                                                          |
| D-dimer             | Not pooled |   | Suzuki 2018 [64]   | 62  | 1/0 | <b>HR 1.03 (1.01-1.05) (/1 <math>\mu g/ml</math>)</b>                                  |
|                     |            |   | Sakamoto 2018 [59] | 80  | 0/1 | OR 0.99 (0.94-1.04) (mg/ml)                                                            |
|                     |            |   | Nikaido 2018 [55]  | 21  | 1/0 | MD 3.10 (-7.48-13.7) ( $\mu g/ml$ ) (non-survivor vs. survivor)                        |
| FDP                 | Not pooled |   | Nikaido 2018 [55]  | 21  | 1/0 | MD 3.0 (-21.6-27.6) ( $\mu g/ml$ ) (non-survivor vs. survivor)                         |
|                     |            |   | Tsushima 2014 [67] | 20  | 1/0 | <b>MD 115.6 (73.5-157.7) (<math>\mu g/ml</math>) (non-survivor vs. survivor)</b>       |
|                     |            |   | Sakamoto 2018 [59] | 80  | -/- | OR 1.00 (0.98-1.02) ( $\mu g/ml$ )                                                     |
| BAL lymphocyte      | Not pooled |   | Song 2011 [63]     | 90  | 0/1 | <b>OR 0.91 (0.83-0.99) (%)</b>                                                         |
|                     |            |   | Suzuki 2018 [64]   | 62  | 0/1 | HR 0.97 (0.92-1.01) (/1%)                                                              |
|                     |            |   | Kishaba 2014 [52]  | 58  | -/- | HR 1.00 (p=0.97)                                                                       |
| BAL neutrophil      | Not pooled |   | Song 2011 [63]     | 90  | 1/0 | OR 1.06 (1.00-1.12) (%)                                                                |
|                     |            |   | Suzuki 2018 [64]   | 62  | 1/0 | <b>HR 1.01 (1.00-1.03) (/1%)</b>                                                       |
|                     |            |   | Kishaba 2014 [52]  | 58  | 0/1 | HR 0.94 (p=0.33)                                                                       |
| Treatment before AE |            |   |                    |     |     |                                                                                        |
| Pirfenidone         | Meta       | 3 |                    | 164 | 3/0 | HR 1.34 (0.81-2.24)                                                                    |

|                       |      |                    |     |     |                                                                      |
|-----------------------|------|--------------------|-----|-----|----------------------------------------------------------------------|
|                       |      | Sakamoto 2018 [59] | 80  | 0/1 | OR 0.85 (0.28-2.56)                                                  |
| Corticosteroid        | Meta | 3                  | 161 | 2/1 | HR 0.96 (0.61-1.52)                                                  |
|                       |      | Song 2011 [63]     | 90  | 0/1 | OR 0.83 (0.35-1.94) (corticosteroid with or without cytotoxic agent) |
|                       |      | Sakamoto [59]      | 80  | 1/0 | OR 1.75 (0.64-4.76)                                                  |
| <b>Oxygen therapy</b> | Meta | 4                  | 160 | 4/0 | <b>HR 1.88 (1.15-3.09)</b>                                           |

a, Text in italic bold refers to potential prognostic factors, which demonstrated consistent and statistically significant results in the majority of studies. If the result of meta-analysis was significant, all studies included for the analysis were assumed to be significant to determine whether the majority of studies demonstrated significant results.

b, The number of included studies was described for meta-analysis while an individual study was specified for non-pooled studies.

c, Plus (+) indicates a positive association between mortality and potential prognostic factors based on point estimates while minus (-) indicates the negative association. Studies with null effects such as zero by MDs and one by HRs were not counted in this column. The direction of point estimates of all pooled and non-pooled studies were considered.

d, Parenthesis indicates 95% confidence interval unless otherwise specified. Text in bold refers to statistically significant results. Per unit for relative values such as ORs and HRs was described only if data was available and otherwise only unit was described.

e, The system considers gender, age and two lung physiology variables, i.e., FVC and DLCO. Points are assigned to each component of the system and there are three stages depending on the total points with a higher value indicating severer disease.

f, The classification consists of PaO<sub>2</sub> at rest and minimum SpO<sub>2</sub> during the six-minute walking test. There are four stages based on a combination of the value of both PaO<sub>2</sub> and SpO<sub>2</sub> with a higher stage indicating severer disease.

AE, acute exacerbation; APACHE, acute physiology and chronic health evaluation; BAL, bronchoalveolar lavage; BMI, body mass index; CRP, C-reactive protein; CI, confidence interval; DLCO, diffusion capacity of the lung for carbon monoxide; FDP, fibrin

1  
2  
3  
4 degradation product; FEV1, forced expiratory volume in 1 second; FVC, forced vital capacity; GAP, gender, age and physiology; GGO,  
5 ground glass opacity; HR, hazard ratio; HRCT, high resolution computed tomography; IPF, idiopathic pulmonary fibrosis; KL-6, Krebs  
6 von den Lungen-6; LDH, lactate dehydrogenase; MD, mean difference; Meta, meta-analysis; OR, odds ratio; PaO<sub>2</sub>, partial pressure of  
7 arterial oxygen; PaO<sub>2</sub>/FiO<sub>2</sub> ratio, partial pressure of arterial oxygen/fraction of inspired oxygen ratio, SMD, standardized mean  
8 difference; SP-D, SpO<sub>2</sub>, saturation of percutaneous oxygen; surfactant protein-D; WBC, white blood cell;  
9  
10  
11  
12  
13  
14  
15  
16  
17  
18  
19  
20  
21  
22  
23  
24  
25  
26  
27  
28  
29  
30  
31  
32  
33  
34  
35  
36  
37  
38  
39  
40  
41  
42  
43  
44  
45  
46

Supplementary e-Table 5 The result of multivariate analysis of potential prognostic factors for all-cause mortality

| Potential prognostic factors <sup>a</sup>                   | Studies (n)        | Subjects (n) | Effect estimates (95% CI) <sup>b</sup>  | Adjusted factors                                                                |
|-------------------------------------------------------------|--------------------|--------------|-----------------------------------------|---------------------------------------------------------------------------------|
| Demographic features                                        |                    |              |                                         |                                                                                 |
| Age                                                         | Akira 2008 [36]    | 58           | HR 1.00 (0.96-1.04) (year)              | sex, smoking history, FVC, DLCO, pattern and extent of abnormality on HRCT, LDH |
|                                                             | Kang 2008 [47]     | 66           | OR 0.97 (0.91-1.04) (year)              | Unclear                                                                         |
|                                                             | Yamazoe 2018 [70]  | 57           | OR 0.96 (0.87-1.07) (year)              | PaO <sub>2</sub> /FiO <sub>2</sub> ratio, CRP, WBC, Hb, antibiotic therapy      |
| Sex                                                         | Akira 2008 [36]    | 58           | HR 0.91 (0.34-2.43) (vs. female)        | age, smoking history, FVC, DLCO, pattern and extent of abnormality on HRCT, LDH |
| Smoking history                                             | Akira 2008 [36]    | 58           | HR 2.47 (0.91-6.70) (vs. never-smoker)  | age, sex, FVC, DLCO, pattern and extent of abnormality on HRCT, LDH             |
|                                                             | Sokai 2017 [62]    | 59           | HR 0.51 (0.23-1.31)                     | GGO and consolidation, LDH, KL-6, oxygen therapy, asymmetrical exacerbation     |
| Disease severity (staging) of underlying IPF or acute phase |                    |              |                                         |                                                                                 |
| GAP system <sup>c</sup>                                     | Atsumi 2018 [38]   | 59           | HR 0.98 (0.62-1.51) (/1 point)          | Unclear                                                                         |
| <b>APACHE II score</b>                                      | Kawamura 2017 [49] | 85           | <b>HR 1.10 (1.01-1.19)</b>              | Unclear                                                                         |
| Symptoms                                                    |                    |              |                                         |                                                                                 |
| Fever                                                       | Kang 2018 [47]     | 66           | OR 1.35 (0.41-4.50)                     | Unclear                                                                         |
| Pulmonary function                                          |                    |              |                                         |                                                                                 |
| FVC                                                         | Akira 2008 [36]    | 58           | HR 0.98 (0.96-1.01) (% predicted value) | age, sex, smoking history, DLCO, pattern and extent of abnormality on HRCT, LDH |
|                                                             | Kang 2018 [47]     | 66           | OR 1.00 (0.96-1.04) (% predicted value) | Unclear                                                                         |

|                                 |                    |    |                                                                |                                                                                |
|---------------------------------|--------------------|----|----------------------------------------------------------------|--------------------------------------------------------------------------------|
| DLCO                            | Akira 2008 [36]    | 58 | HR 1.02 (1.00-1.04) (% predicted value)                        | age, sex, smoking history, FVC, pattern and extent of abnormality on HRCT, LDH |
| Features on HRCT                |                    |    |                                                                |                                                                                |
| <b>Pattern</b>                  | Akira 2008 [36]    | 58 | <b>HR 4.63 (1.90-11.3)</b> (diffuse+multifocal vs. peripheral) | age, sex, smoking history, FVC, DLCO, extent of abnormality on HRCT, LDH       |
| Extent of GGO and consolidation | Kishaba 2014 [52]  | 58 | <b>HR 2.29 (p=0.03)</b>                                        | Unclear                                                                        |
|                                 | Akira 2008 [36]    | 58 | HR 0.98 (0.95-1.02) (%)                                        | Unclear                                                                        |
|                                 | Sokai 2017 [62]    | 59 | HR 0.99 (0.96-1.02) (%)                                        | smoking history, LDH, KL-6, oxygen therapy, asymmetrical exacerbation          |
| <b>Extent of abnormality</b>    | Akira 2008 [36]    | 58 | <b>HR 1.07 (1.02-1.12) (%)</b>                                 | age, sex, smoking history, FVC, DLCO, pattern of abnormality on HRCT, LDH      |
|                                 | Atsumi 2018 [38]   | 59 | HR 1.18 (0.99-1.39) (/10 score)                                | Unclear                                                                        |
|                                 | Enomoto 2018 [42]  | 37 | <b>HR 1.22 (1.01-1.48) (score)</b>                             | age                                                                            |
| Laboratory findings             |                    |    |                                                                |                                                                                |
| <b>PaO2/FiO2 ratio</b>          | Kang 2018 [47]     | 66 | <b>OR 0.99 (0.98-1.00)</b>                                     | Unclear                                                                        |
|                                 | Yamazoe 2018 [70]  | 57 | OR 1.00 (0.99-1.01)                                            | age, CRP, WBC, Hb, antibiotic therapy                                          |
|                                 | Kishaba 2018 [51]  | 65 | <b>HR 0.99 (0.99-1.00)</b>                                     | LDH, delta LDH, delta KL-6, criteria of AE                                     |
|                                 | Suzuki 2018 [64]   | 62 | <b>HR 0.31 (0.14-0.67) (&gt;300 vs. ≤300)</b>                  | Unclear                                                                        |
|                                 | Sakamoto 2018 [59] | 80 | <b>OR 0.99 (0.99-1.00)</b>                                     | Unclear                                                                        |
| CRP                             | Song 2011 [63]     | 90 | <b>OR 2.47 (1.03-5.91) (mg/dl)</b>                             | Unclear                                                                        |
|                                 | Yamazoe 2018 [70]  | 57 | OR 1.00 (0.90-1.13) (mg/dl)                                    | age, PaO2/FiO2 ratio, WBC, Hb, antibiotic therapy                              |

|                       |                   |    |                                       |                                                                                         |
|-----------------------|-------------------|----|---------------------------------------|-----------------------------------------------------------------------------------------|
|                       | Kataoka 2015 [48] | 40 | OR 1.18 (1.00-1.39) (mg/dl)           | respiratory rate                                                                        |
| <b>LDH</b>            | Kang 2018 [47]    | 66 | OR 1.00 (1.00-1.00)                   | Unclear                                                                                 |
|                       | Akira 2008 [36]   | 58 | <b>HR 1.002 (1.000-1.004)</b>         | age, sex, smoking history, FVC, DLCO, pattern and extent of abnormality on HRCT         |
|                       | Kishaba 2018 [51] | 65 | <b>HR 1.003 (1.001-1.005) (IU/L)</b>  | PaO <sub>2</sub> /FiO <sub>2</sub> ratio, delta LDH, delta KL-6, criteria of AE         |
|                       | Enomoto 2018 [42] | 37 | <b>HR 1.01 (1.00-1.01) (IU/L)</b>     | age                                                                                     |
|                       | Sokai 2017 [62]   | 59 | <b>HR 1.02 (1.00-1.05) (/10IU/L)</b>  | smoking history, GGO and consolidation, KL-6, oxygen therapy, asymmetrical exacerbation |
| <b>KL-6</b>           | Suzuki 2018 [64]  | 62 | <b>HR 1.24 (1.05-1.46) (/500U/mL)</b> | Unclear                                                                                 |
|                       | Sokai 2017 [62]   | 59 | HR 0.99 (0.96-1.02) (/100U/mL)        | smoking history, GGO and consolidation, LDH, oxygen therapy, asymmetrical exacerbation  |
| <b>WBC</b>            | Yamazoe 2018 [70] | 57 | <b>OR 1.38 (1.04-1.83) (/μl)</b>      | age, PaO <sub>2</sub> /FiO <sub>2</sub> ratio, CRP, Hb, antibiotic therapy              |
| <b>D-dimer</b>        | Suzuki 2018 [64]  | 62 | <b>HR 1.04 (1.02-1.06) (/1μg/mL)</b>  | Unclear                                                                                 |
| BAL lymphocyte        | Song 2011 [63]    | 90 | OR 0.87 (0.74-1.02) (%)               | Unclear                                                                                 |
| <b>BAL neutrophil</b> | Suzuki 2018 [64]  | 62 | <b>HR 1.02 (1.00-1.03) (%)</b>        | Unclear                                                                                 |
| Treatment before AE   |                   |    |                                       |                                                                                         |
| <b>Oxygen therapy</b> | Enomoto 2018 [42] | 37 | <b>HR 3.68 (1.05-12.9)</b>            | age                                                                                     |
|                       | Sokai 2017 [62]   | 59 | <b>HR 2.34 (1.04-5.28)</b>            | smoking history, GGO and consolidation, LDH, asymmetrical exacerbation                  |

a, Text in italic bold refers to potential prognostic factors, which demonstrated consistent and statistically significant results in the majority of studies.



1  
2  
3  
4  
5 b, Parenthesis indicates 95% confidence interval unless otherwise specified. Text in bold refers to statistically significant results. Per unit  
6 for relative values such as ORs and HRs was described only if data was available and otherwise only unit was described.  
7

8 c, The system considers gender, age and two lung physiology variables, i.e., FVC and DLCO. Points are assigned to each component of  
9 the system and there are three stages depending on the total points with a higher value indicating severer disease.  
10

11  
12 AE, acute exacerbation; APACHE, acute physiology and chronic health evaluation; BAL, bronchoalveolar lavage; CRP, C-reactive  
13 protein; CI, confidence interval; DLCO, diffusion capacity of the lung for carbon monoxide; FVC, forced vital capacity; GAP, gender,  
14 age and physiology; GGO, ground glass opacity; Hb, haemoglobin; HR, hazard ratio; HRCT, high resolution computed tomography;  
15 KL-6, Krebs von den Lungen-6; LDH, lactate dehydrogenase; OR, odds ratio; PaO<sub>2</sub>/FiO<sub>2</sub> ratio, partial pressure of arterial  
16 oxygen/fraction of inspired oxygen, WBC, white blood cell  
17  
18  
19  
20  
21  
22  
23  
24  
25  
26  
27  
28  
29  
30  
31  
32  
33  
34  
35  
36  
37  
38  
39  
40  
41  
42  
43  
44  
45  
46

1  
2  
3  
4  
5  
6  
7  
8  
9  
10  
11  
12  
13  
14  
15  
16  
17  
18  
19  
20  
21  
22  
23  
24  
25  
26  
27  
28  
29  
30  
31  
32  
33  
34  
35  
36  
37  
38  
39  
40  
41  
42  
43  
44  
45  
46

Supplementary e-Table 6 Assessment of quality of evidence of prognostic factors by the Grades of Recommendation, Assessment, Development and Evaluation (GRADE) system

| Outcome: all-cause mortality    |                       |       |                   |                            |              |                  |             |                            |                        |                 |
|---------------------------------|-----------------------|-------|-------------------|----------------------------|--------------|------------------|-------------|----------------------------|------------------------|-----------------|
| GRADE factors                   |                       |       |                   |                            |              |                  |             |                            |                        |                 |
| Prognostic factors <sup>a</sup> | Analysis <sup>b</sup> | Phase | Study limitations | Inconsistency <sup>c</sup> | Indirectness | Publication bias | Imprecision | Moderate/large effect size | Dose response gradient | Overall quality |
| APACHE II score                 | Uni                   | 1     | +                 | -                          | -            | +                | -           | -                          | -                      | Very Low        |
|                                 | Multi                 | 1     | +                 | N/A                        | -            | +                | -           | -                          | -                      | Very low        |
| PaO2/FiO2 ratio                 | Uni                   | 1     | +                 | -                          | -            | +                | -           | +                          | -                      | Low             |
|                                 | Multi                 | 1     | +                 | -                          | -            | +                | -           | -                          | -                      | Very low        |
| LDH                             | Uni                   | 1     | +                 | -                          | -            | +                | -           | -                          | -                      | Very low        |
|                                 | Multi                 | 1     | +                 | -                          | -            | +                | -           | -                          | -                      | Very low        |
| WBC                             | Uni                   | 1     | +                 | -                          | -            | +                | -           | -                          | -                      | Very low        |
|                                 | Multi                 | 1     | +                 | N/A                        | -            | +                | -           | -                          | -                      | Very low        |
| Oxygen therapy (before AE)      | Uni                   | 1     | +                 | -                          | -            | +                | -           | -                          | -                      | Very low        |
|                                 | Multi                 | 1     | +                 | -                          | -            | +                | +           | +                          | -                      | Very low        |

a, A total of 5 clinical information was determined as prognostic factors from 30 potential prognostic factors based on the consistent and significant result on both univariate and multivariate analyses.

b, ‘uni’ indicating univariate analysis while ‘multi’ indicating multivariate analysis.

c, N/A indicating not applicable due to only one study available.

1  
2  
3  
4 AE, acute exacerbation; APACHE, acute physiology and chronic health evaluation; BAL, bronchoalveolar lavage; HRCT, high  
5 resolution computed tomography; KL-6, Krebs von den Lungen-6; LDH, lactate dehydrogenase; PaO<sub>2</sub>/FiO<sub>2</sub> ratio, partial pressure of  
6 arterial oxygen/fraction of inspired oxygen ratio, WBC, white blood cell;  
7  
8  
9  
10  
11  
12  
13  
14  
15  
16  
17  
18  
19  
20  
21  
22  
23  
24  
25  
26  
27  
28  
29  
30  
31  
32  
33  
34  
35  
36  
37  
38  
39  
40  
41  
42  
43  
44  
45  
46

For peer review only

## Supplementary e-Figure

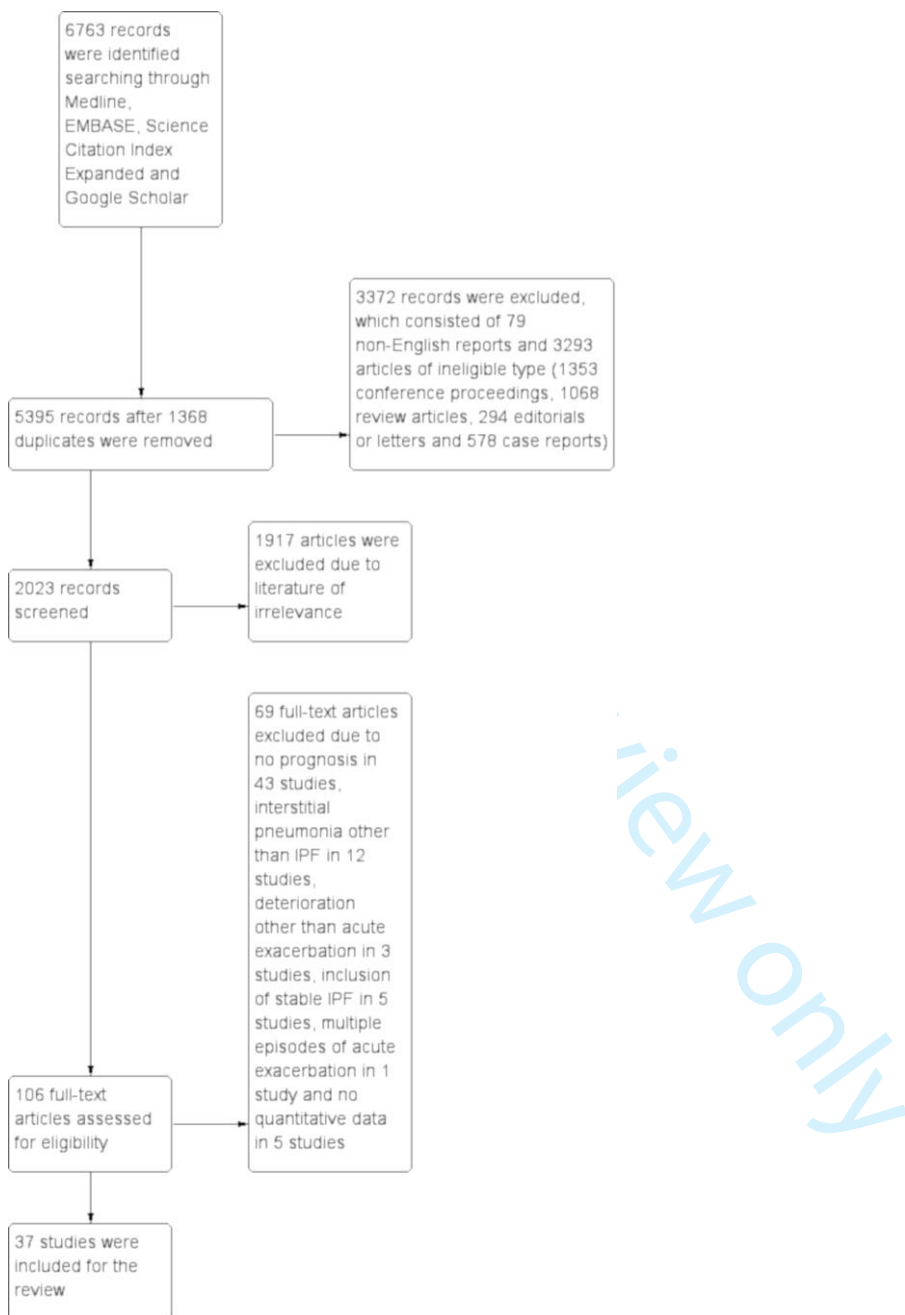

Supplementary e-Figure 1. Study flow diagram

A total of 6763 reports were identified through Medline, EMBASE, Science Citation Index Expanded and Google Scholar. After excluding 1368 duplicates, 79 non-English records, 3293 reports of ineligible types (consisting of 1353 conference proceedings,

1  
2  
3  
4  
5  
6 1068 review articles, 294 editorials or letters and 578 case reports) and 1917 irrelevant  
7 articles, the remaining 106 reports were obtained as full-texts. Out of these, 69 reports  
8 were excluded due to no prognosis in 43 studies, interstitial pneumonia other than  
9 idiopathic pulmonary fibrosis (IPF) in 12 studies, deterioration other than acute  
10 exacerbation in 3 studies, inclusion of stable IPF in 5 studies, multiple episodes of acute  
11 exacerbation in 1 study and no quantitative data in 5 studies. Finally, 37 articles/studies  
12 were eligible for this review.  
13  
14  
15  
16  
17  
18  
19  
20  
21  
22  
23  
24  
25  
26  
27  
28  
29  
30  
31  
32  
33  
34  
35  
36  
37  
38  
39  
40  
41  
42  
43  
44  
45  
46  
47  
48  
49  
50  
51  
52  
53  
54  
55  
56  
57  
58  
59  
60

For peer review only

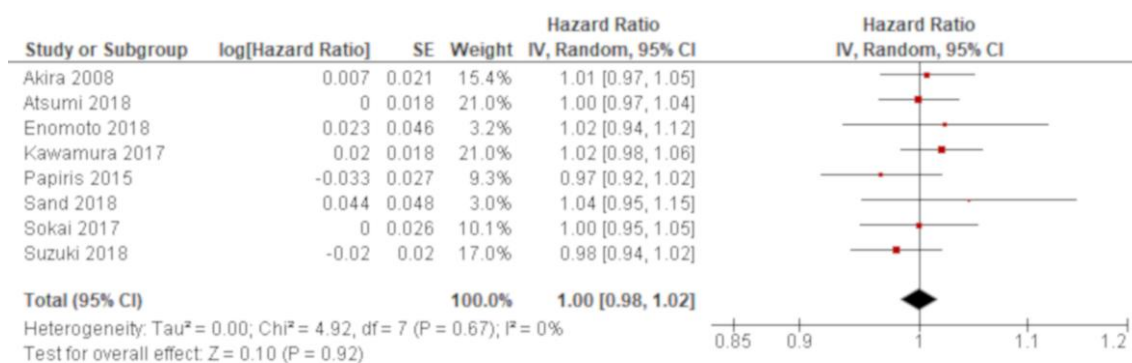

Supplementary e-Figure 2. Forrest plot of the result of univariate analysis for age (combined by hazard ratio)

The result of univariate analysis in 8 studies was pooled for meta-analysis and a total of 405 patients were included. Age was not significantly associated with all-cause mortality with a hazard ratio (HR) of 1.00 (95% confidence interval: 0.98 to 1.02,  $p=0.92$ ). There was no heterogeneity ( $\chi^2=4.92$ ,  $p=0.67$ ,  $I^2=0\%$ ).

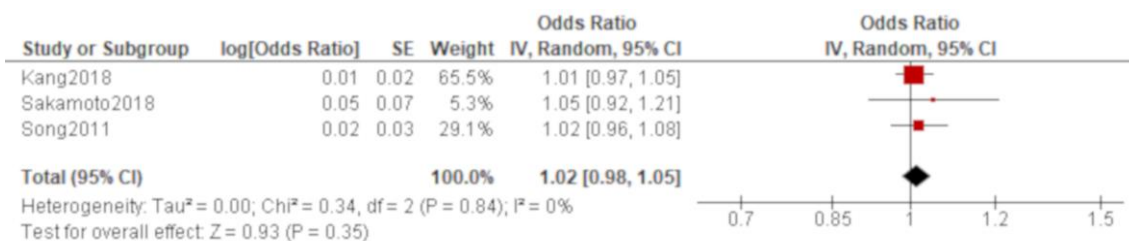

Supplementary e-Figure 3. Forrest plot of the result of univariate analysis for age (combined by odds ratio)

The result of univariate analysis in 3 studies was pooled for meta-analysis and a total of 236 patients were included. Age was not significantly associated with all-cause mortality with an odds ratio (OR) of 1.02 (95% confidence interval: 0.98 to 1.05,  $p=0.35$ ). There was no heterogeneity ( $\chi^2=0.34$ ,  $p=0.84$ ,  $I^2=0\%$ ).

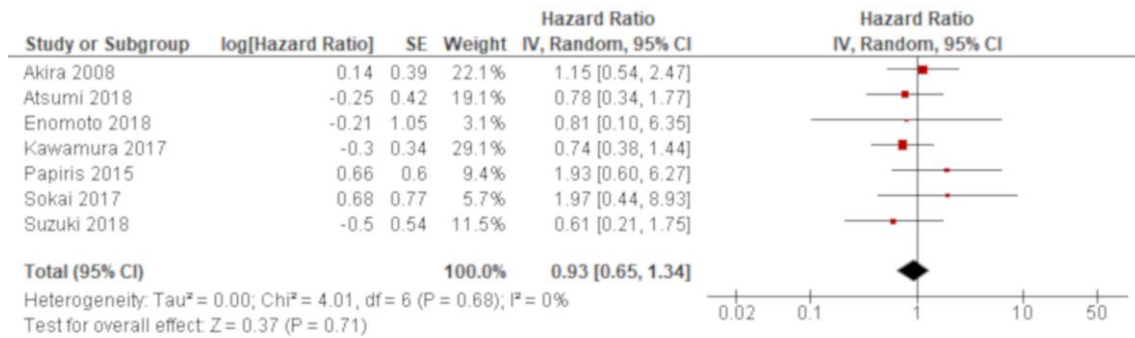

Supplementary e-Figure 4. Forrest plot of the result of univariate analysis for sex (male vs. female) (combined by hazard ratio)

The result of univariate analysis in 7 studies was pooled for meta-analysis and a total of 377 patients were included. Men were not significantly associated with all-cause mortality with a hazard ratio (HR) of 0.93 (95% confidence interval: 0.65 to 1.34,  $p=0.71$ ). There was no heterogeneity ( $\text{chi}^2=4.01$ ,  $p=0.68$ ,  $I^2=0\%$ ).



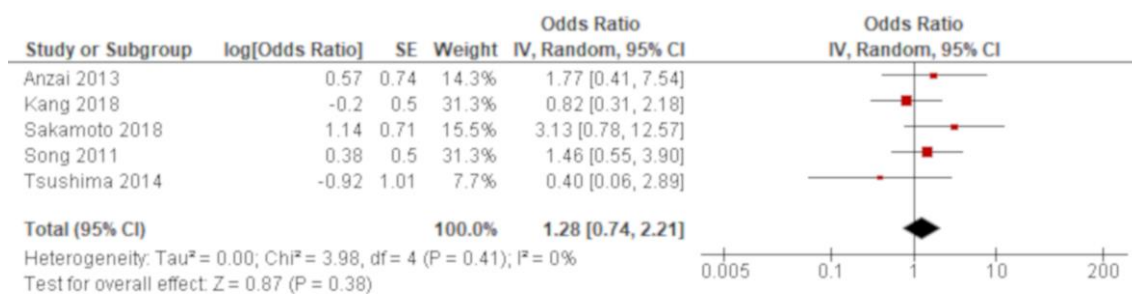

Supplementary e-Figure 5. Forrest plot of the result of univariate analysis for sex (male vs. female) (combined by odds ratio)

The result of univariate analysis in 5 studies was pooled for meta-analysis and a total of 306 patients were included. Men were not significantly associated with all-cause mortality with an odds ratio (OR) of 1.28 (95% confidence interval: 0.74 to 2.21,  $p=0.38$ ). There was no heterogeneity ( $\chi^2=3.98$ ,  $p=0.41$ ,  $I^2=0\%$ ).

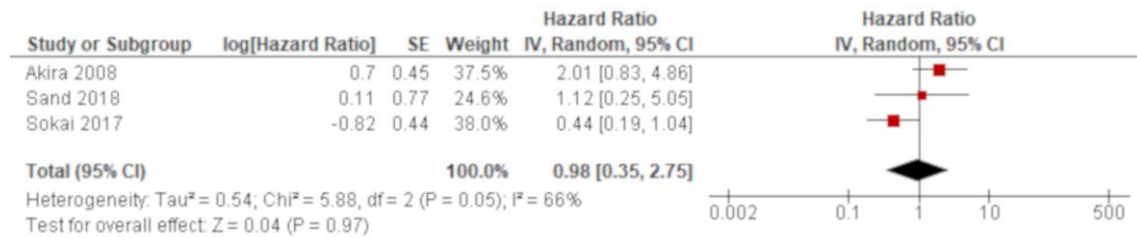

Supplementary e-Figure 6. Forrest plot of the result of univariate analysis for smoking history (ever-smoker vs. never-smoker) (combined by hazard ratio)

The result of univariate analysis in 3 studies was pooled for meta-analysis and a total of 145 patients were included. Smoking history was not significantly associated with all-cause mortality with a hazard ratio (HR) of 0.98 (95% confidence interval: 0.35 to 2.75,  $p=0.97$ ). There was considerable heterogeneity with statistical significance ( $\chi^2=5.88$ ,  $p=0.05$ ,  $I^2=66\%$ ). The 95% prediction interval ranged from 0.0000 to 95377. All studies were conducted in Japan and implemented nearly the same definition of AE of IPF. One study (Sokai 2017 [62]) demonstrated the effect estimate in the opposite direction from the other two studies. It included over 50 patients and analysed 180-day all-cause mortality whereas the other two studies included over 50 or fewer than 50 patients and analysed in-hospital or overall all-cause mortality.

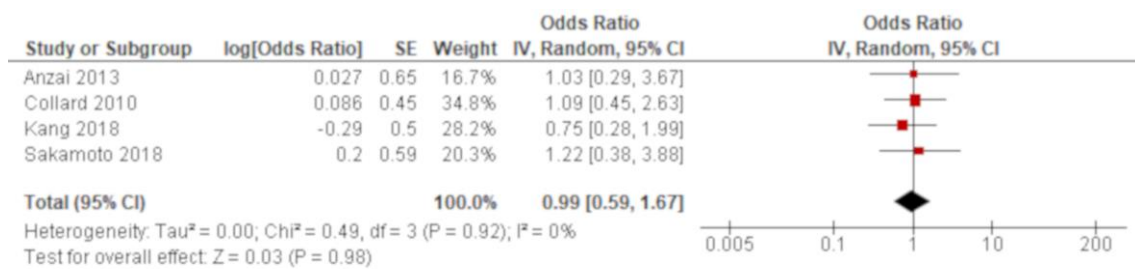

Supplementary e-Figure 7. Forrest plot of the result of univariate analysis for smoking history (ever-smoker vs. never-smoker) (combined by odds ratio)

The result of univariate analysis in 4 studies was pooled for meta-analysis and a total of 243 patients were included. Smoking history was not significantly associated with all-cause mortality with an odds ratio (OR) of 0.99 (95% confidence interval: 0.59 to 1.67,  $p=0.98$ ). There was no heterogeneity ( $\text{chi}^2=0.49$ ,  $p=0.92$ ,  $I^2=0\%$ ).

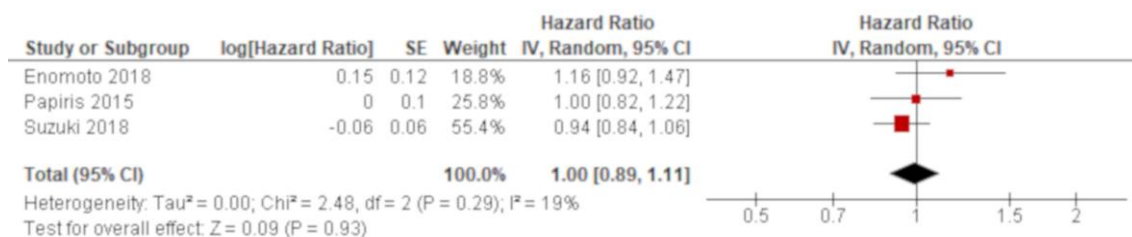

Supplementary e-Figure 8. Forrest plot of the result of univariate analysis for smoking history (pack-year)

The result of univariate analysis in 3 studies was pooled for meta-analysis and a total of 116 patients were included. Smoking history was not significantly associated with all-cause mortality with a hazard ratio (HR) of 1.00 (95% confidence interval: 0.89 to 1.11,  $p=0.93$ ). There was mild heterogeneity with no statistical significance ( $\chi^2=2.48$ ,  $p=0.29$ ,  $I^2=19\%$ ). The 95% prediction interval ranged from 0.51 to 1.97.

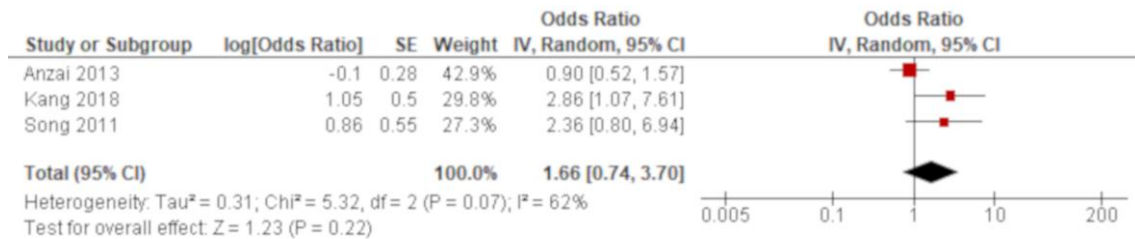

### Supplementary e-Figure 9. Forrest plot of the result of univariate analysis for fever

The result of univariate analysis in 3 studies was pooled for meta-analysis and a total of 206 patients were included. Fever was not significantly associated with all-cause mortality with an odds ratio (OR) of 1.66 (95% confidence interval: 0.74 to 3.70,  $p=0.22$ ). There was considerable heterogeneity with statistical significance ( $\chi^2=5.32$ ,  $p=0.07$ ,  $I^2=62\%$ ). The 95% prediction interval ranged from 0.0003 to 10770. All studies implemented the same definition of AE of IPF. One study (Anzai 2013 [37]), which was conducted in Japan, demonstrated the effect estimate in the opposite direction from the other two studies. It included 50 patients and analysed overall all-cause mortality. The other two studies, which were conducted in Korea, included over 50 patients and analysed in-hospital all-cause mortality.

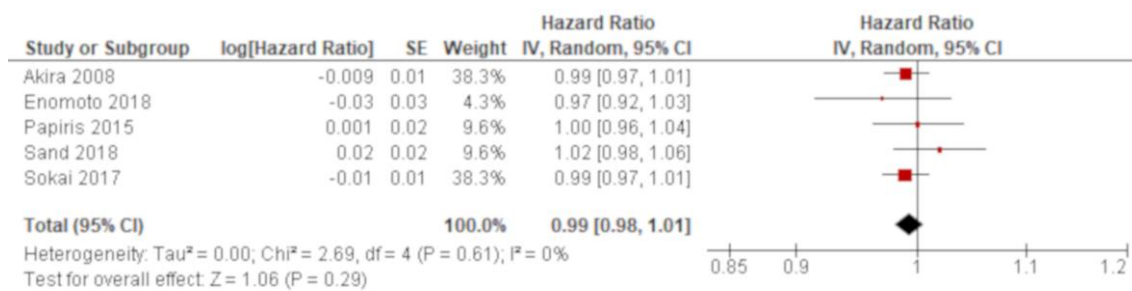

Supplementary e-Figure 10. Forrest plot of the result of univariate analysis for percentage of predicted value of forced vital capacity (%FVC) (combined by hazard ratio)

The result of univariate analysis in 5 studies was pooled for meta-analysis and a total of 199 patients were included. %FVC was not significantly associated with all-cause mortality with a hazard ratio (HR) of 0.99 (95% confidence interval: 0.98 to 1.01,  $p=0.29$ ). There was no heterogeneity ( $\chi^2=2.69$ ,  $p=0.61$ ,  $I^2=0\%$ ).

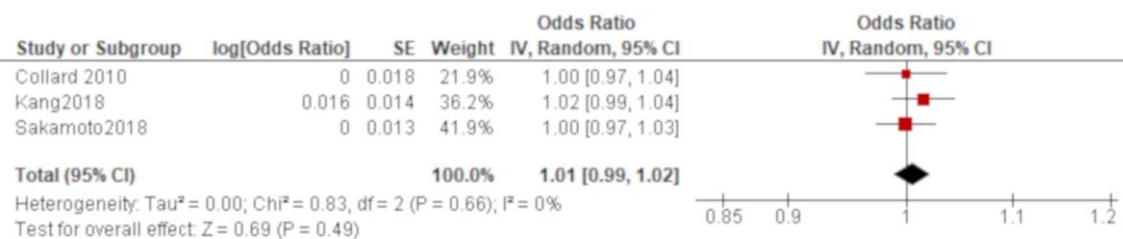

Supplementary e-Figure 11. Forrest plot of the result of univariate analysis for percentage of predicted value of forced vital capacity (%FVC) (combined by odds ratio)

The result of univariate analysis in 3 studies was pooled for meta-analysis and a total of 193 patients were included. %FVC was not significantly associated with all-cause mortality with an odds ratio (OR) of 1.01 (95% confidence interval: 0.99 to 1.02,  $p=0.49$ ). There was no heterogeneity ( $\text{chi}^2=0.83$ ,  $p=0.66$ ,  $I^2=0\%$ ).

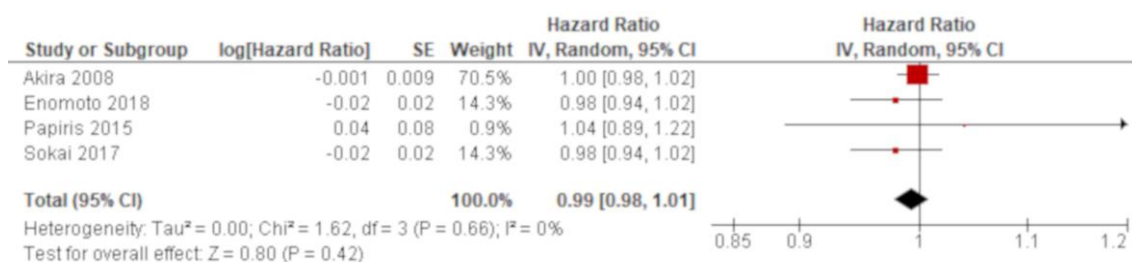

Supplementary e-Figure 12. Forrest plot of the result of univariate analysis for percentage of predictive value of diffusion capacity of the lung for carbon monoxide (%DLCO)

The result of univariate analysis in 4 studies was pooled for meta-analysis and a total of 171 patients were included. %DLCO was not significantly associated with all-cause mortality with a hazard ratio (HR) of 0.99 (95% confidence interval: 0.98 to 1.01,  $p=0.42$ ). There was no heterogeneity ( $\chi^2=1.62$ ,  $p=0.66$ ,  $I^2=0\%$ ).



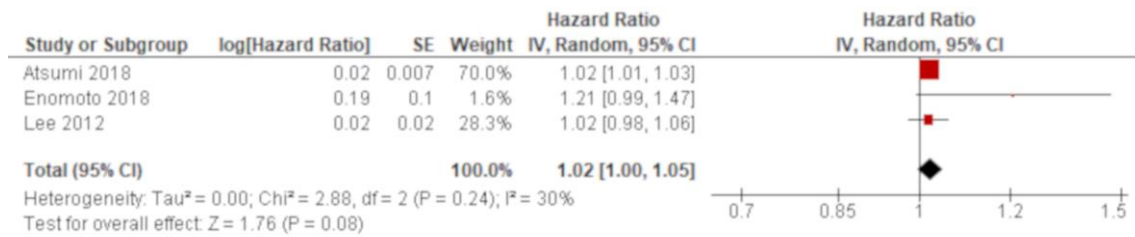

Supplementary e-Figure 13. Forrest plot of the result of univariate analysis for extent of abnormality on high resolution computed tomography (HRCT) scan

The result of univariate analysis in 3 studies was pooled for meta-analysis and a total of 120 patients were included. Extent of abnormality on HRCT scan was not significantly associated with all-cause mortality with a hazard ratio (HR) of 1.02 (95% confidence interval: 1.00 to 1.05,  $p=0.08$ ). There was moderate heterogeneity with no statistical significance ( $\chi^2=2.88$ ,  $p=0.24$ ,  $I^2=30\%$ ). The 95% prediction interval ranged from 0.85 to 1.23.

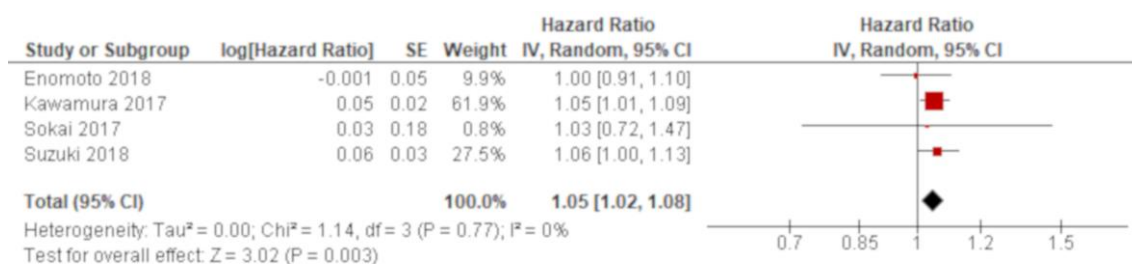

Supplementary e-Figure 14. Forrest plot of the result of univariate analysis for C-reactive protein (CRP) (combined by hazard ratio)

The result of univariate analysis in 4 studies was pooled for meta-analysis and a total of 243 patients were included. CRP was significantly associated with all-cause mortality with a hazard ratio (HR) of 1.05 (95% confidence interval: 1.02 to 1.08,  $p=0.003$ ).

There was no heterogeneity ( $\chi^2=1.14$ ,  $p=0.77$ ,  $I^2=0\%$ ).

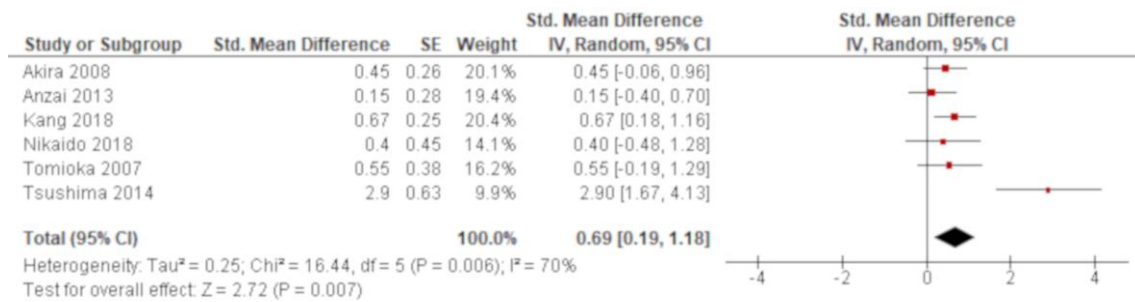

Supplementary e-Figure 15. Forrest plot of the result of univariate analysis for C-reactive protein (CRP) (combined by standardized mean difference)

The result of univariate analysis in 6 studies was pooled for meta-analysis and a total of 242 patients were included. CRP was significantly associated with all-cause mortality with a standardized mean difference (SMD) of 0.69 (95% confidence interval: 0.19 to 1.18,  $p=0.007$ ). There was substantial heterogeneity ( $\chi^2=16.44$ ,  $p=0.006$ ,  $I^2=70\%$ ). The 95% prediction interval ranged from -0.86 to 2.24. All studies except for one study (Kang 2018 [47]) were conducted in Japan and most of these studies included 50 or fewer patients. All studies implemented nearly the same definition of AE of IPF. The effect of one study (Tsushima 2014 [67]) was extremely different from that of the other five studies. It analysed 28-day all-cause mortality whereas the other five studies analysed either in-hospital, 60-day, 3-month or overall all-cause mortality. Meta-analysis excluding this study demonstrated a SMD of 0.45 (95% CI: 0.19 to 0.72) with no heterogeneity ( $\chi^2=2.00$ ,  $p=0.74$ ,  $I^2=0\%$ ).

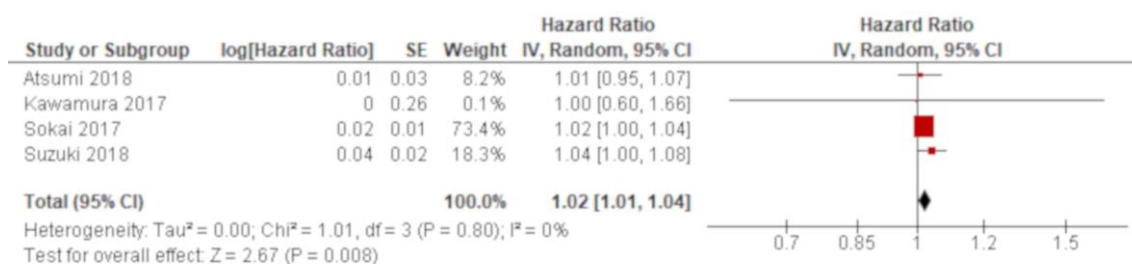

Supplementary e-Figure 16. Forrest plot of the result of univariate analysis for Krebs von den Lungen-6 (KL-6) (combined by hazard ratio)

The result of univariate analysis in 4 studies was pooled for meta-analysis and a total of 265 patients were included. KL-6 was significantly associated with all-cause mortality with a hazard ratio (HR) of 1.02 (95% confidence interval: 1.01 to 1.04,  $p=0.008$ ).

There was no heterogeneity ( $\chi^2=1.01$ ,  $p=0.80$ ,  $I^2=0\%$ ).

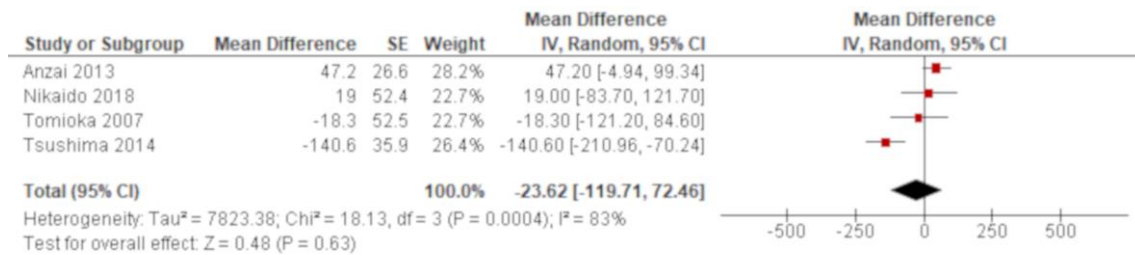

Supplementary e-Figure 17. Forrest plot of the result of univariate analysis for Krebs von den Lungen-6 (KL-6) (combined by mean difference)

The result of univariate analysis in 4 studies was pooled for meta-analysis and a total of 118 patients were included. KL-6 was not significantly associated with all-cause mortality with a mean difference (MD) of -23.6 (95% confidence interval: -119.7 to 72.5,  $p=0.63$ ). There was substantial heterogeneity with statistical significance ( $\text{chi}^2=18.13$ ,  $p=0.0004$ ,  $I^2=83\%$ ). The 95% prediction interval ranged from -458.7 to 411.5. All studies were conducted in Japan and included 50 or fewer patients. All studies implemented nearly the same definition of AE of IPF. The effect of one study (Tsushima 2014 [67]) was extremely different from that of the other three studies. It analysed 28-day all-cause mortality whereas the other three studies analysed either in-hospital, 60-day or overall all-cause mortality. Meta-analysis excluding this study demonstrated an MD of 31.3 (95%CI: -11.1 to 73.7) with no heterogeneity ( $\text{chi}^2=1.30$ ,  $p=0.52$ ,  $I^2=0\%$ ).

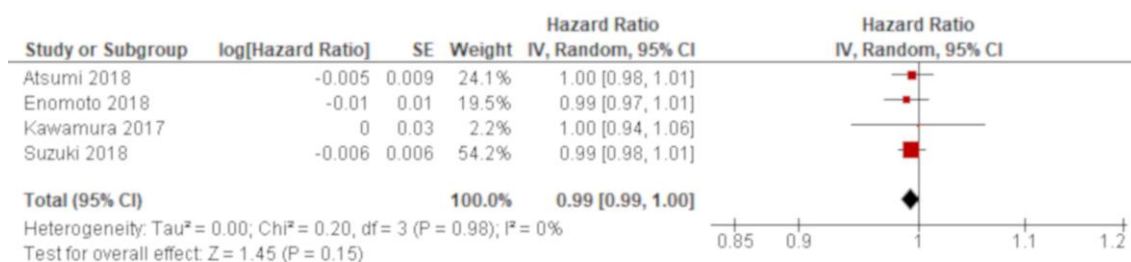

Supplementary e-Figure 18. Forrest plot of the result of univariate analysis for surfactant protein-D (SP-D)

The result of univariate analysis in 4 studies was pooled for meta-analysis and a total of 243 patients were included. SP-D was not significantly associated with all-cause mortality with a hazard ratio (HR) of 0.99 (95% confidence interval: 0.99 to 1.00,  $p=0.15$ ). There was no heterogeneity ( $\text{chi}^2=0.20$ ,  $p=0.98$ ,  $I^2=0\%$ ).

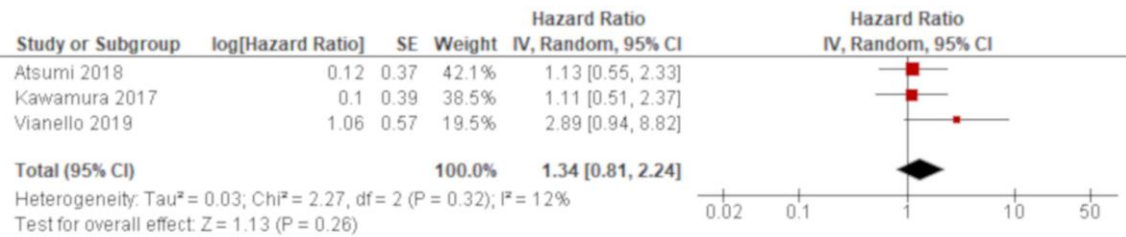

Supplementary e-Figure 19. Forrest plot of the result of univariate analysis for pirfenidone therapy before acute exacerbation

The result of univariate analysis in 3 studies was pooled for meta-analysis and a total of 164 patients were included. Pirfenidone therapy before acute exacerbation was not significantly associated with all-cause mortality with a hazard ratio (HR) of 1.34 (95% confidence interval: 0.81 to 2.24,  $p=0.26$ ). There was mild heterogeneity with no statistical significance ( $\chi^2=2.27$ ,  $p=0.32$ ,  $I^2=12\%$ ). The 95% prediction interval ranged from 0.02 to 75.6.

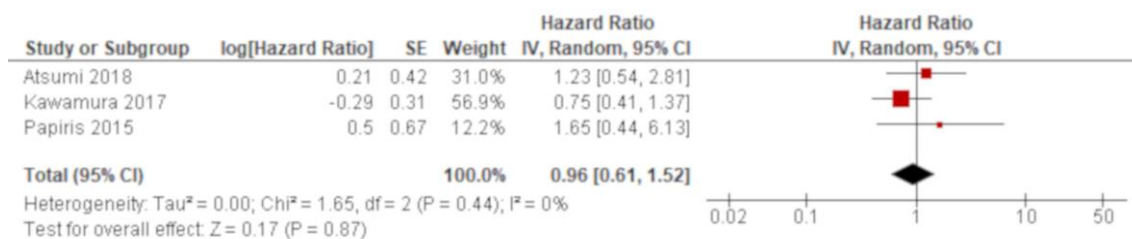

Supplementary e-Figure 20. Forrest plot of the result of univariate analysis for corticosteroid therapy before acute exacerbation

The result of univariate analysis in 3 studies was pooled for meta-analysis and a total of 161 patients were included. Corticosteroid therapy before acute exacerbation was not significantly associated with all-cause mortality with a hazard ratio (HR) of 0.96 (95% confidence interval: 0.61 to 1.52,  $p=0.87$ ). There was no heterogeneity ( $\chi^2=1.65$ ,  $p=0.44$ ,  $I^2=0\%$ ).



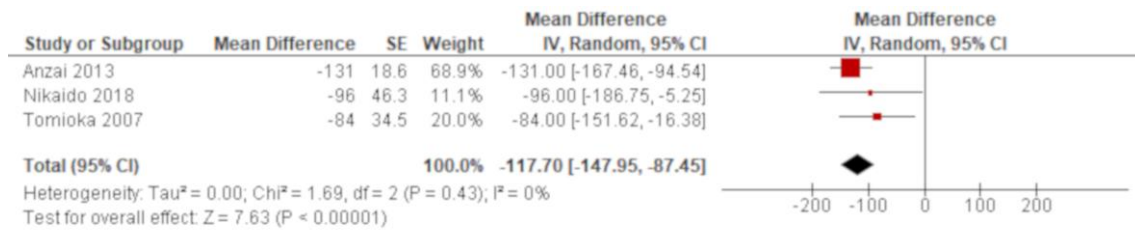

Supplementary e-Figure 21. Forrest plot of the result of univariate analysis for partial pressure of arterial oxygen to fraction of inspired oxygen (PaO<sub>2</sub>/FiO<sub>2</sub>) ratio (combined by mean difference)

As there was substantial heterogeneity in the result of meta-analysis using MD for PaO<sub>2</sub>/FiO<sub>2</sub> ratio (Figure 4), meta-analysis was re-conducted after excluding one study (Tsushima 2014 [67]) that demonstrated an extremely different effect estimate from the other studies. The result was significant with an MD of -117.7 (95%CI: -148.0 to -87.5) and no heterogeneity was identified (chi<sup>2</sup>=1.69, p=0.43, I<sup>2</sup>=0%).

## Supplementary e-Appendix: Search terms for each electronic database

## Medline (Ovid)

- 1 exp Pulmonary Fibrosis/
- 2 exp Idiopathic Pulmonary Fibrosis/
- 3 exp Lung Diseases, Interstitial/
- 4 (pulmonary adj3 fibros\$).mp.
- 5 (interstitial adj3 pneumoni\$).mp.
- 6 exp Disease Progression /
- 7 (acute adj3 exacerbation?).mp.
- 8 (disease adj3 progression?).mp.
- 9 (disease adj3 exacerbation?).mp.
- 10 (deterioration?).mp.
- 11 incidence.sh.
- 12 exp Mortality/
- 13 follow-up studies.sh.
- 14 prognos\$.tw.
- 15 predict\$.tw.
- 16 course\$.tw.
- 17 (1 or 2 or 3 or 4 or 5)
- 18 (6 or 7 or 8 or 9 or 10)
- 19 (11 or 12 or 13 or 14 or 15 or 16)
- 20 (17 and 18 and 19)
- 21 limit 20 to yr="2002 -Current"

## EMBASE (Ovid)

- 1 exp fibrosing alveolitis/
- 2 exp interstitial pneumonia/
- 3 exp lung fibrosis /
- 4 (pulmonary adj3 fibros\$).mp.
- 5 (interstitial adj3 pneumoni\$).mp.
- 6 exp disease exacerbation /
- 7 exp deterioration /
- 8 (acute adj3 exacerbation?).mp.
- 9 (disease adj3 progression?).mp.
- 10 (disease adj3 exacerbation?).mp.
- 11 risk\$.mp.
- 12 diagnos\$.mp.
- 13 follow-up.mp.
- 14 ep.fs.
- 15 outcome.tw.
- 16 exp disease course/
- 17 (1 or 2 or 3 or 4 or 5)
- 18 (6 or 7 or 8 or 9 or 10)
- 19 (11 or 12 or 13 or 14 or 15 or 16)
- 20 (17 and 18 and 19)
- 21 limit 20 to yr="2002 -Current"

1  
2  
3  
4  
5  
6 Science Citation Index Expanded (Web of Science)  
7

8 #1 TS=("interstitial NEAR/3 lung NEAR/3 disease\$") OR TS=("interstitial NEAR/3  
9 pneumonia\$") OR TS=(alveolitis) OR TS=("pulmonary NEAR/3 fibros\*")  
10  
11

12 #2 TS=(acute NEAR/3 exacerbation\$) OR TS=(disease NEAR/3 progression\$) OR  
13 TS=(disease NEAR/3 exacerbation\$) OR TS=(deterioration\$)  
14

15 #3 TS=(prognos\*) OR TS=(mortality) OR TS=(outcome) OR TS=(course\$) OR  
16 TS=(follow-up) OR TS=(predict\*) OR TS=(incidence) OR TS=(risk)  
17  
18

19 #4 #1 AND #2 AND #3  
20

21 #5 #4 AND (2002-2019)  
22  
23  
24  
25  
26  
27  
28  
29  
30  
31  
32  
33  
34  
35  
36  
37  
38  
39  
40  
41  
42  
43  
44  
45  
46  
47  
48  
49  
50  
51  
52  
53  
54  
55  
56  
57  
58  
59  
60

1  
2  
3  
4  
5  
6 Google scholar  
7

8 (“acute exacerbation” OR "disease progression" OR "disease exacerbation")  
9 (“interstitial lung disease” OR “usual interstitial pneumonia” OR “idiopathic pulmonary  
10 fibrosis”) (prognosis OR mortality OR outcome)  
11  
12  
13  
14  
15  
16  
17  
18  
19  
20  
21  
22  
23  
24  
25  
26  
27  
28  
29  
30  
31  
32  
33  
34  
35  
36  
37  
38  
39  
40  
41  
42  
43  
44  
45  
46  
47  
48  
49  
50  
51  
52  
53  
54  
55  
56  
57  
58  
59  
60

For peer review only

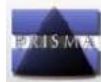

# PRISMA 2009 Checklist

| Section/topic                      | #  | Checklist item                                                                                                                                                                                                                                                                                              | Reported on page #   |
|------------------------------------|----|-------------------------------------------------------------------------------------------------------------------------------------------------------------------------------------------------------------------------------------------------------------------------------------------------------------|----------------------|
| <b>TITLE</b>                       |    |                                                                                                                                                                                                                                                                                                             |                      |
| Title                              | 1  | Identify the report as a systematic review, meta-analysis, or both.                                                                                                                                                                                                                                         | Page 1               |
| <b>ABSTRACT</b>                    |    |                                                                                                                                                                                                                                                                                                             |                      |
| Structured summary                 | 2  | Provide a structured summary including, as applicable: background; objectives; data sources; study eligibility criteria, participants, and interventions; study appraisal and synthesis methods; results; limitations; conclusions and implications of key findings; systematic review registration number. | Page 2-3             |
| <b>INTRODUCTION</b>                |    |                                                                                                                                                                                                                                                                                                             |                      |
| Rationale                          | 3  | Describe the rationale for the review in the context of what is already known.                                                                                                                                                                                                                              | Page 4               |
| Objectives                         | 4  | Provide an explicit statement of questions being addressed with reference to participants, interventions, comparisons, outcomes, and study design (PICOS).                                                                                                                                                  | Page 4-5             |
| <b>METHODS</b>                     |    |                                                                                                                                                                                                                                                                                                             |                      |
| Protocol and registration          | 5  | Indicate if a review protocol exists, if and where it can be accessed (e.g., Web address), and, if available, provide registration information including registration number.                                                                                                                               | Page 5               |
| Eligibility criteria               | 6  | Specify study characteristics (e.g., PICOS, length of follow-up) and report characteristics (e.g., years considered, language, publication status) used as criteria for eligibility, giving rationale.                                                                                                      | Page 5               |
| Information sources                | 7  | Describe all information sources (e.g., databases with dates of coverage, contact with study authors to identify additional studies) in the search and date last searched.                                                                                                                                  | Page 6               |
| Search                             | 8  | Present full electronic search strategy for at least one database, including any limits used, such that it could be repeated.                                                                                                                                                                               | Page 6<br>e-Appendix |
| Study selection                    | 9  | State the process for selecting studies (i.e., screening, eligibility, included in systematic review, and, if applicable, included in the meta-analysis).                                                                                                                                                   | Page 6               |
| Data collection process            | 10 | Describe method of data extraction from reports (e.g., piloted forms, independently, in duplicate) and any processes for obtaining and confirming data from investigators.                                                                                                                                  | Page 6               |
| Data items                         | 11 | List and define all variables for which data were sought (e.g., PICOS, funding sources) and any assumptions and simplifications made.                                                                                                                                                                       | Page 6               |
| Risk of bias in individual studies | 12 | Describe methods used for assessing risk of bias of individual studies (including specification of whether this was done at the study or outcome level), and how this information is to be used in any data synthesis.                                                                                      | Page 6               |
| Summary measures                   | 13 | State the principal summary measures (e.g., risk ratio, difference in means).                                                                                                                                                                                                                               | Page 6               |
| Synthesis of results               | 14 | Describe the methods of handling data and combining results of studies, if done, including measures of consistency (e.g., I <sup>2</sup> ) for each meta-analysis. <a href="http://bmjopen.bmj.com/site/about/guidelines.xhtml">http://bmjopen.bmj.com/site/about/guidelines.xhtml</a>                      | Page 6-7             |



# PRISMA 2009 Checklist

Page 1 of 2

| Section/topic                 | #  | Checklist item                                                                                                                                                                                           | Reported on page #        |
|-------------------------------|----|----------------------------------------------------------------------------------------------------------------------------------------------------------------------------------------------------------|---------------------------|
| Risk of bias across studies   | 15 | Specify any assessment of risk of bias that may affect the cumulative evidence (e.g., publication bias, selective reporting within studies).                                                             | Page 7                    |
| Additional analyses           | 16 | Describe methods of additional analyses (e.g., sensitivity or subgroup analyses, meta-regression), if done, indicating which were pre-specified.                                                         | Page 7                    |
| <b>RESULTS</b>                |    |                                                                                                                                                                                                          |                           |
| Study selection               | 17 | Give numbers of studies screened, assessed for eligibility, and included in the review, with reasons for exclusions at each stage, ideally with a flow diagram.                                          | Page 8<br>e-Figure 1      |
| Study characteristics         | 18 | For each study, present characteristics for which data were extracted (e.g., study size, PICOS, follow-up period) and provide the citations.                                                             | Page 8-9<br>e-Table 1     |
| Risk of bias within studies   | 19 | Present data on risk of bias of each study and, if available, any outcome level assessment (see item 12).                                                                                                | Page 9<br>e-Table 3       |
| Results of individual studies | 20 | For all outcomes considered (benefits or harms), present, for each study: (a) simple summary data for each intervention group (b) effect estimates and confidence intervals, ideally with a forest plot. | Page 10-12<br>e-Table 4,5 |
| Synthesis of results          | 21 | Present results of each meta-analysis done, including confidence intervals and measures of consistency.                                                                                                  | Page 10-12<br>e-Table 4   |
| Risk of bias across studies   | 22 | Present results of any assessment of risk of bias across studies (see Item 15).                                                                                                                          | Page 12-13                |
| Additional analysis           | 23 | Give results of additional analyses, if done (e.g., sensitivity or subgroup analyses, meta-regression [see Item 16]).                                                                                    | Page 12                   |
| <b>DISCUSSION</b>             |    |                                                                                                                                                                                                          |                           |
| Summary of evidence           | 24 | Summarize the main findings including the strength of evidence for each main outcome; consider their relevance to key groups (e.g., healthcare providers, users, and policy makers).                     | Page 13                   |
| Limitations                   | 25 | Discuss limitations at study and outcome level (e.g., risk of bias), and at review-level (e.g., incomplete retrieval of identified research, reporting bias).                                            | Page 15-16                |
| Conclusions                   | 26 | Provide a general interpretation of the results in the context of other evidence, and implications for future research.                                                                                  | Page 17                   |
| <b>FUNDING</b>                |    |                                                                                                                                                                                                          |                           |
| Funding                       | 27 | Describe sources of funding for the systematic review and other support (e.g., supply of data); role of funders for the systematic review.                                                               | Page 17                   |

1  
2  
3  
4  
5  
6  
7  
8  
9  
10  
11  
12  
13  
14  
15  
16  
17  
18  
19  
20  
21  
22  
23  
24  
25  
26  
27  
28  
29  
30  
31  
32  
33  
34  
35  
36  
37  
38  
39  
40  
41  
42  
43  
44  
45  
46

| Checklist items for Meta-analyses of Observational Studies in Epidemiology (MOOSE)                           | Reported      |
|--------------------------------------------------------------------------------------------------------------|---------------|
|                                                                                                              | on Page       |
| Reporting of background should include                                                                       |               |
| • Problem definition                                                                                         | Page 4-5      |
| • Hypothesis statement                                                                                       | Not described |
| • Description of study outcome(s)                                                                            | Page 5        |
| • Type of exposure or intervention used                                                                      | Page 5        |
| • Type of study designs used                                                                                 | Page 5        |
| • Study population                                                                                           | Page 5        |
| Reporting of search strategy should include                                                                  |               |
| • Qualifications of searchers (eg, librarians and investigators)                                             | Page 6        |
| • Search strategy, including time period included in the synthesis and keywords                              | Page 6        |
|                                                                                                              | e-Appendix    |
| • Effort to include all available studies, including contact with authors                                    | Page 6        |
| • Databases and registries searched                                                                          | Page 6        |
| • Search software used, name and version, including special features used (eg, explosion)                    | Not described |
| • Use of hand searching (eg, reference lists of obtained articles)                                           | Page 6        |
| • List of citations located and those excluded, including justification                                      | e-Figure 1    |
| • Method of addressing articles published in languages other than English                                    | Page 5        |
| • Method of handling abstracts and unpublished studies                                                       | Page 6        |
| • Description of any contact with authors                                                                    | Page 6        |
| Reporting of methods should include                                                                          |               |
| • Description of relevance or appropriateness of studies assembled for assessing the hypothesis to be tested | Not described |



|    |                                                                                                                                              |               |
|----|----------------------------------------------------------------------------------------------------------------------------------------------|---------------|
| 1  |                                                                                                                                              |               |
| 2  |                                                                                                                                              |               |
| 3  |                                                                                                                                              |               |
| 4  |                                                                                                                                              |               |
| 5  | • Rationale for the selection and coding of data (eg, sound clinical principles or convenience)                                              | Not described |
| 6  | • Documentation of how data were classified and coded (eg, multiple raters, blinding, and interrater reliability)                            | Not described |
| 7  | • Assessment of confounding (eg, comparability of cases and controls in studies where appropriate)                                           | Not described |
| 8  | • Assessment of study quality, including blinding of quality assessors; stratification or regression on possible predictors of study results | Page 6        |
| 9  | • Assessment of heterogeneity                                                                                                                | Page 7        |
| 10 | • Description of statistical methods (eg, complete description of fixed or random effects models, justification of whether the chosen        | Page 7        |
| 11 | models account for predictors of study results, dose-response models, or cumulative meta-analysis) in sufficient detail to be replicated     |               |
| 12 | • Provision of appropriate tables and graphics                                                                                               | e-Figure 1    |
| 13 |                                                                                                                                              | (study flow   |
| 14 |                                                                                                                                              | diagram)      |
| 15 |                                                                                                                                              |               |
| 16 |                                                                                                                                              |               |
| 17 |                                                                                                                                              |               |
| 18 |                                                                                                                                              |               |
| 19 |                                                                                                                                              |               |
| 20 | Reporting of results should include                                                                                                          |               |
| 21 | • Graphic summarizing individual study estimates and overall estimate                                                                        | e-Table 4, 5  |
| 22 | • Table giving descriptive information for each study included                                                                               | e-Table 1     |
| 23 | • Results of sensitivity testing (eg, subgroup analysis)                                                                                     | Page 12       |
| 24 | • Indication of statistical uncertainty of findings                                                                                          | Page 10-12    |
| 25 |                                                                                                                                              | e-Table 4, 5  |
| 26 |                                                                                                                                              |               |
| 27 |                                                                                                                                              |               |
| 28 |                                                                                                                                              |               |
| 29 | Reporting of discussion should include                                                                                                       |               |
| 30 | • Quantitative assessment of bias (eg, publication bias)                                                                                     | Not described |
| 31 | • Justification of exclusion (eg, exclusion of non-English-language citations)                                                               | Not described |
| 32 | • Assessment of quality of included studies                                                                                                  | Page 16       |
| 33 |                                                                                                                                              |               |
| 34 | Reporting of conclusions should include                                                                                                      |               |
| 35 | • Consideration of alternative explanations for observed results                                                                             | Page 15       |
| 36 | • Generalization of the conclusions (ie, appropriate for the data presented and within the domain of the literature review)                  | Page 16       |
| 37 |                                                                                                                                              |               |
| 38 |                                                                                                                                              |               |
| 39 |                                                                                                                                              |               |
| 40 |                                                                                                                                              |               |
| 41 |                                                                                                                                              |               |
| 42 |                                                                                                                                              |               |
| 43 |                                                                                                                                              |               |
| 44 |                                                                                                                                              |               |
| 45 |                                                                                                                                              |               |
| 46 |                                                                                                                                              |               |

1  
2  
3  
4  
5  
6  
7  
8  
9  
10  
11  
12  
13  
14  
15  
16  
17  
18  
19  
20  
21  
22  
23  
24  
25  
26  
27  
28  
29  
30  
31  
32  
33  
34  
35  
36  
37  
38  
39  
40  
41  
42  
43  
44  
45  
46

- 
- Guidelines for future research Page 16
  - Disclosure of funding source Page 17
- 

From Stroup DF, Berlin JA, Morton SC, et al. Meta-analysis of observational studies in epidemiology: a proposal for reporting. Meta-analysis Of Observational Studies in Epidemiology (MOOSE) group. JAMA 2000;283:2008-12.

For peer review only
